# Supplementary material for: Disciplined doctors: Does the sex of a doctor matter? A cross-sectional study examining the association between a doctor's sex and receiving sanctions against their medical registration
Source: PubMed Central journal article supplement — BMJ Open. 2014 Aug 7;4(8):e005405. doi: 10.1136/bmjopen-2014-005405 (PMC4127941; doi:10.1136/bmjopen-2014-005405), 2014-08-07
Supplement: bmjopen-2014-005405.draft_revisions.pdf [file bmjopen-2014-005405.draft_revisions.pdf]

# BMJ Open

## Disciplined doctors: does the sex of a doctor matter?

|                                 |                                                                                                                                                                                                                                                              |
|---------------------------------|--------------------------------------------------------------------------------------------------------------------------------------------------------------------------------------------------------------------------------------------------------------|
| Journal:                        | <i>BMJ Open</i>                                                                                                                                                                                                                                              |
| Manuscript ID:                  | bmjopen-2014-005405                                                                                                                                                                                                                                          |
| Article Type:                   | Research                                                                                                                                                                                                                                                     |
| Date Submitted by the Author:   | 09-Apr-2014                                                                                                                                                                                                                                                  |
| Complete List of Authors:       | Unwin, Emily; University College London, UCL Medical School<br>Woolf, Katherine; University College London, UCL Medical School<br>Wadlow, Clare; University College London, UCL Medical School<br>Dacre, Jane; University College London, UCL Medical School |
| <b>Primary Subject Heading</b>: | Medical education and training                                                                                                                                                                                                                               |
| Secondary Subject Heading:      | Health services research, Epidemiology                                                                                                                                                                                                                       |
| Keywords:                       | LAW (see Medical Law), MEDICAL EDUCATION & TRAINING, EPIDEMIOLOGY, GMC, Gender                                                                                                                                                                               |
|                                 |                                                                                                                                                                                                                                                              |

SCHOLARONE™  
Manuscripts

## Title Page

### Disciplined doctors: does the sex of a doctor matter?

Emily Unwin, Katherine Woolf, Clare Wadlow, Jane Dacre

**Corresponding author:**

Prof Jane Dacre, Director UCL Medical school  
UCL Medical School, 74 Huntley Street. London, WC1E 6AU. UK  
j.dacre@ucl.ac.uk  
Tel: 020 7679 0894  
Fax: 020 7679 0890

Dr Emily Unwin, PhD student  
UCL Medical School, Royal Free Hospital, London, NW3 2PF. UK

Dr Katherine Woolf, Lecturer  
UCL Medical School, Royal Free Hospital, London, NW3 2PF. UK

Dr Clare Wadlow, Clinical training fellow  
UCL Medical School, Royal Free Hospital, London, NW3 2PF. UK

**Key words:**

Law, Medical education & training, epidemiology, GMC, gender

**Word count:**

4316

## Abstract

**Objectives:** To examine the association between doctors' sex and receiving sanctions on their medical registration, whilst controlling for other potentially confounding variables.

**Design:** Cross-sectional study.

**Setting:** The General Medical Council's (GMC) List of Registered Medical Practitioners (LRMP) database of doctors practising in the United Kingdom (UK).

**Population:** All doctors on the GMC's LRMP on 29<sup>th</sup> May 2013. The database included all doctors who are or have been registered to practice medicine in the UK since October 2005. The exposure of interest was doctor's sex. Confounding variables included years since primary medical qualification, world region of primary medical qualification and specialty.

**Outcome measures:** Sanctions on a doctor's medical registration. Sanction types included warning, undertakings, conditions, suspension or erasure from the register. Binary logistic regression modelling, controlling for the confounders, described the association between doctor's sex and sanctions on a doctor's medical registration.

**Results:** Of the 329,542 doctors on the LRMP, 2,697 doctors (0.8%) had sanctions against their registration, 516 (19.1%) of whom were female. In the fully adjusted model, female doctors had nearly a third of the odds (OR 0.37, 95% CI: 0.33-0.41) of having sanctions compared to male doctors. There was evidence that the association varies with specialty, with female doctors who had specialised as GPs being the least likely to receive sanctions compared to their male colleagues.

**Conclusions:** Female doctors have reduced odds of receiving sanctions on their medical registration when compared to their male colleagues. This association remained after adjustment for the confounding factors. These results are representative of all doctors registered to practice in the UK. Further exploration of why doctors' sex may impact their professional performance is underway.

## Article summary

### Strengths and limitations of this study

- We used a large national database with no missing data, so the findings of the study apply to all doctors registered to practise in the UK.
- Receiving sanctions is a rare outcome and using a large dataset is crucial when examining rare outcomes.
- This is one of the first studies of this nature on UK data that adjusted for known confounders.
- The study was constrained by the variables collected and made available by the GMC. So we were unable to examine the effect of other potential confounding factors.
- The data available did not provide the reasons for why a sanction had been imposed, nor data on those granted voluntary erasure. A more detailed evaluation of the reasons for referral to the GMC may go towards explaining the sex difference observed.

## Introduction

The number of complaints about doctors' fitness to practise received by the UK medical regulatory body, the General Medical Council (GMC), has been increasing since 2007<sup>1</sup>. Following a triage and investigation process by the GMC the outcome of a case against a doctor can be closed, or can result in a sanction against the doctor's registration. The cost of this regulatory process, both in terms of financial cost of the actual complaints investigation procedure, but also in terms of the loss of the medical workforce during the process, can be significant. The level of stress that a doctor endures while undergoing a fitness to practise investigation was recently reported in the BMJ and highlights the impact the complaints investigation procedure can have on the mental well being of doctors<sup>2</sup>.

One of the most significant changes in the medical profession has been the increase in the number of women entering this previously male dominated profession. The number of female medical students has been increasing since the mid-1960s with female medical students outnumbering male medical students since the mid-1990s<sup>3</sup>. It is predicted that female doctors will outnumber their male colleagues by 2017<sup>3</sup>. This change in the demographic profile of UK doctors has brought with it a heightened interest in how the increase of female doctors may impact the profession.

Examining and understanding the predictors of doctors receiving sanctions may aid the medical profession in identifying doctors whose performance might raise future concerns, in order to support these doctors and help prevent GMC referral. Research from the United States of America has suggested that male and female doctors differ in terms of risk of disciplinary action, with male doctors being at increased risk<sup>4,5,6,7,8</sup>. However, the applicability of the findings from these American studies to the UK may be limited due to differences in both the medical and legal systems in these countries. In 2011 Wakeford explored the situation in the UK<sup>9</sup>. He examined the factors associated with severest outcomes of the GMC disciplinary procedures, suspension or erasure from the medical register. In agreement with the American studies, he demonstrated that female doctors were four times less likely to be disciplined when compared to male doctors. However, the interpretation of this finding is limited because the measure of effect for doctors' sex was not adjusted for potential confounders.

We aimed to examine the effect of doctors' sex on receiving sanctions against their medical registration, while adjusting for known confounding factors. This would allow

1  
2  
3 for a meaningful comparison of male and female doctors and their experience of  
4 disciplinary action in the UK.  
5  
6

## 7 8 **Methods**

### 9 **Study design, setting and source of data**

10 We conducted a cross-sectional study using UK-wide data. The data were obtained  
11 from the GMC. Under the Medical Act 1983 the GMC is required to keep up-to-date  
12 registers of qualified doctors. The main register is the List of Registered Medical  
13 Practitioners (LRMP). The LRMP is a list of all doctors registered to practise  
14 medicine in the UK, and as such changes daily. The GMC provided us with a  
15 snapshot of doctors registered on the LRMP on the 29<sup>th</sup> May 2013. The list included  
16 doctors who have been registered with the GMC at any point in the period 20<sup>th</sup>  
17 October 2005<sup>a</sup> – 28<sup>th</sup> May 2013. The different categories of registration status  
18 included: provisionally registered with a licence; provisionally registered without a  
19 licence; registered with a licence; registered without a licence; suspended; not  
20 registered – administrative reason; not registered – deceased; not registered –  
21 erased after Fitness to Practise panel hearing; and not registered – having  
22 relinquished registration. The database provided details of doctor's sex; the year,  
23 country, and institutions of the doctor's primary medical qualification; date of entry on  
24 the GP and/or Specialist registers (when they complete specialty training and qualify  
25 as a specialist); and the doctor's current registration status, including whether they  
26 currently had any sanctions on their medical registration (see below for details).  
27  
28  
29  
30  
31  
32  
33  
34  
35  
36  
37

### 38 **Population**

39 All doctors who were listed on the LRMP on the 29<sup>th</sup> May 2013 were included.  
40  
41  
42

### 43 **Primary outcome and exposure**

44 The outcome of interest was sanctions on a doctor's medical registration on the 29<sup>th</sup>  
45 May 2013.  
46

47 The types of sanctions included:

- 48  
49 • **Warning:** issued when a doctor's performance has not been in keeping with  
50 the principles set by the GMC for doctors, but a restriction on the doctor's  
51 registration is not necessary. Warnings remain on the LRMP for a five year  
52 period;  
53  
54  
55

56  
57 <sup>a</sup> The 20<sup>th</sup> October 2005 was the date when the GMC first began to publish full details of a doctor's  
58 registration status on the LRMP online.  
59  
60

- **Undertakings:** an agreement between the GMC and the doctor about the doctor's future practice. The doctor must adhere to these undertakings to maintain their registration;
- **Conditions:** set out by the GMC and restrict a doctor's practice. The doctor must comply with these conditions to maintain their registration. Conditions can initially be imposed for a maximum of three years and then be renewed in periods of up to 36 months;
- **Suspension or erasure:** the doctor's licence is withdrawn by the GMC and they are no longer able to practise. Suspension from the register can last up to 12 months, but may be indefinite in certain circumstances.

A sanction can be imposed if a doctor's fitness to practise has been proved to be impaired. The impairment can result from misconduct; poor professional performance; physical or mental ill health; or a conviction or fitness to practise determination by another regulatory body either in the UK or overseas<sup>10</sup>. However it is recognised that the reason for impairment can cross more than one category (for example a doctor with a drug misuse problem could be classified as having mental ill health, yet the effects of the drug abuse could impact their professional performance). The duration of a sanction on a doctor's registration varies and it is possible for doctors to have more than one sanction against their registration and this typically represents the outcomes of different complaints. It was not possible to establish the date a sanction was imposed from the available data.

The outcome of interest was collapsed into a binary variable: doctors with sanctions against their registration; and doctors with no sanctions against their registration.

The exposure of interest was doctor's sex, as declared by the doctor to the GMC.

### **Selection of variables**

The variables included in the study were selected before any statistical analysis. Data was available on the year of primary medical qualification (PMQ), country of PMQ and primary specialty, if on the Specialist or General Practitioner (GP) Registers. These variables were selected as a priori confounders based on findings from earlier research<sup>6,7,9,11</sup>, which demonstrated that these factors may influence the risk of receiving sanctions.

Once the variables had been selected, we performed a variable reduction process, to reduce the number categories into meaningful categories. Once again, this was

1  
2  
3 performed before any statistical analysis. The variable 'year of PMQ' was converted  
4 into 'number of years since qualification' by subtracting the year of PMQ from 2013  
5  
6<sup>b</sup>. We then collapsed the variable into six categories. The first category '0-2 years'  
7 represented Foundation Training, the second category '3-10 years' represented the  
8 bulk of time a doctor would likely spend in Specialty Training. The subsequent  
9 categories were divided into 10-year blocks. The variable 'country of PMQ' was  
10 collapsed into three categories; 'UK', 'EEA' (European Economic Area) and  
11 'International'. The list of countries included in the EEA category was obtained from  
12 the European Union website<sup>12</sup> and included all countries that were members before  
13 May 2013. The variable 'specialty' was divided into fourteen categories. Doctors  
14 who were not present on either the Specialist Register or the GP Register were  
15 categorised as having 'no specialty'. Doctors on both the Specialist Register and the  
16 GP Register were recorded as having 'dual specialty' and doctors only on the GP  
17 register were categorised as 'GP'. For doctors only registered on the Specialist  
18 Register, their primary specialty was taken and recorded into one of eleven  
19 categories. To categorise those doctors on the Specialist Register two researchers  
20 (EU and CW) independently allocated each primary specialty to a specialty category.  
21 Kappa statistic demonstrated a good level of agreement ( $\kappa = 0.72$ ). Any  
22 disagreements about specialty category allocation were resolved through discussion.  
23  
24  
25  
26  
27  
28  
29  
30  
31  
32

### 33 **Statistical methods**

34  
35 We took a causal modelling analysis approach to analyse the data. We firstly  
36 performed bivariate analyses to look for crude associations in the data, followed by  
37 Mantel-Haenszel analyses, before going on to complete multivariate analyses using  
38 binary logistic regression modelling. The initial logistic regression model included  
39 only the exposure (sex) and outcome (sanctions) variables to provide a crude  
40 measure of effect. The final logistic regression model was built to include all  
41 potential confounder variables, while checking for multicollinearity. The final logistic  
42 regression model enabled the calculation of an adjusted measure of effect. The final  
43 model was assessed for the presence of effect modifiers following the findings from  
44 the Mantel-Haenszel analyses.  
45  
46  
47  
48  
49  
50

51  
52 Statistical analyses were conducted using the software Stata 12/SE.  
53  
54

---

55  
56<sup>b</sup> As mentioned above, a doctor could appear in the LRMP dataset if they had been removed from the  
57 medical register. The actual date of those doctors being removed could lie anytime between 20<sup>th</sup>  
58 October 2005 and 28<sup>th</sup> May 2013. However, as no actual removal dates were given for those doctors,  
59 we used 2013 for all doctors.  
60



We used the STROBE Statement<sup>13</sup> to guide our study report.

## Results

There were 329,542 doctors on the LRMP on the 29<sup>th</sup> May 2013, of whom 40.3% were female. Table 1 shows the distribution of variables by the sex of doctors. The median number of years since qualification was 19 years. The distribution of the number of years since a doctor had qualified was skewed to the right with the majority of the doctors qualifying 11-20 years ago (28.1%). The majority of the doctors had received their PMQ from a UK medical school (59.3%).

Approximately half of all the doctors were neither on the GP Register nor the Specialist Register (51.0%), of which the majority (58.0%) had received their PMQ greater than 10 years previously. Of those doctors who had specialised, General Practice was the most popular specialty (21.3%), followed by Medicine (6.6%). 0.5% of the doctors were on both the Specialist and GP Registers.

2697 (0.8%) doctors had sanctions against their registration on the 29<sup>th</sup> May 2013. There was a higher proportion of male doctors who had sanctions against their registration when compared to female doctors (1.1% of all male doctors compared with 0.4% of all female doctors,  $\chi^2=505.4$ ,  $P<0.001$ ). There was strong evidence for an association between receiving sanctions and the number of years since received PMQ, with doctors who qualified 31-40 years ago having the highest proportion of sanctions; world region of PMQ, with doctors who qualified outside the EEA with the highest proportion of doctors with sanctions; and specialty, with doctors on both the Specialist and GP Registers having the highest proportion of doctors with sanctions. These results are presented in Table 2.

Using bivariate analyses we compared female doctors to male doctors. There was a strong trend between sex of a doctor and the number of years since the doctor received their PMQ, with female doctors being more likely to have recently qualified and the proportion of female doctors reducing as the number of years since PMQ increased. We also found that female doctors were more likely to have qualified in the UK (65.5% of all female doctors compared to 55.0% of all male doctors) and male doctors were more likely to have qualified outside of the EEA (32.1% of all male doctors compared to 22.5% of all female doctors). Approximately equal proportions of male and female doctors qualified in the EEA (12.9% and 12.0% respectively). Both sexes were more likely to not to be registered in a specialty (GP or hospital), though there was a slightly higher proportion of women when compared to men who

1  
2  
3 were not on the Specialist or GP Registers. When examining those doctors who  
4 were registered in a specialty, a higher proportion of female doctors were on the GP  
5 Register compared to male doctors (24.3% of female doctors compared with 19.3%  
6 of male doctors) and a higher proportion of male doctors were registered with a  
7 hospital specialty (32.0% of male doctors compared with 20.1% of female doctors).  
8  
9 In summary, number of years since received PMQ, world region where PMQ was  
10 received, and registered specialty were associated with both the outcome (sanctions)  
11 and the exposure (sex of a doctor) and as such we considered these variables as  
12 confounders.  
13  
14  
15  
16

17  
18 The unadjusted odds ratio for having sanctions against a doctor's registration  
19 comparing female doctors with male doctors was 0.35 (95% CI: 0.32-0.38),  
20 suggesting that being a female doctor is protective of receiving sanctions.  
21

22 Mantel-Haenszel analyses and tests of homogeneity were conducted to examine the  
23 change in the strength of the association between sanctions and sex while controlling  
24 for each of the confounders separately.  
25

26 There was strong evidence that the true odds ratios were different between the  
27 different specialty categories ( $P=0.0002$ ), therefore specialty was considered as an  
28 effect modifier when conducting multivariate analyses.  
29  
30  
31

32  
33 Table 3 represents the results from the binary logistic regression model built to adjust  
34 for all the variables. After taking into account the number of years since PMQ, world  
35 region where the doctor received their PMQ and specialty, female doctors had nearly  
36 a third of the odds of having sanctions on their registration compared to male doctors  
37 (OR 0.37, 95% CI: 0.33-0.41,  $P<0.0001$ ).  
38

39 All of the a priori confounders were felt to be confounders because the adjusted odds  
40 ratio changed when each variable was added to the model. We found no evidence  
41 of multicollinearity.  
42

43 The Mantel-Haenszel analyses suggested that specialty may be an effect modifier,  
44 we therefore performed a statistical test for effect modification by firstly collapsing the  
45 specialty variable into four groups to increase the power of the test. Table 4  
46 demonstrates that specialty was felt to be an important effect modifier with female  
47 doctors being less likely to receive sanctions when compared to male doctors, but  
48 the effect was greater for GPs than for those doctors with no specialty or practising a  
49 hospital specialty.  
50  
51  
52  
53  
54  
55  
56  
57  
58  
59  
60

1  
2  
3 Upon discovering the strong evidence for an association between doctor's sex and  
4 likelihood of receiving sanctions on a doctor's registration, we decided to further the  
5 findings by performing post-hoc analyses to establish whether the type of sanction  
6 imposed on a doctor's registration was associated with doctor's sex. All variables  
7 were categorised to create binary variables to ensure there were sufficient cases in  
8 each category of variable. The results displayed in Table 5 demonstrate that female  
9 doctors have reduced odds of having each type of sanction imposed on their  
10 registration when compared to their male colleagues. Female doctors had  
11 approximately one third of the odds of receiving a warning, being suspended or  
12 erased from the register and they had just over half the odds of receiving  
13 undertakings or conditions on their registration compared to male doctors. The  
14 Mantel-Haenszel analyses suggested that when examining the outcome 'warning'  
15 specialty may be an effect modifier, and when examining the outcome 'erased' world  
16 region where received PMQ may be an effect modifier, we therefore performed a  
17 statistical test for effect modification. Specialty was demonstrated to be an important  
18 effect modifier when examining the association between warning and sex, with  
19 female specialists having approximately half the odds of receiving a warning  
20 compared to male specialists, whereas for male and female doctors without a  
21 specialty there was no strong evidence for a difference in the odds of receiving a  
22 warning (see Table 6). World region where a doctor received their PMQ was also  
23 shown to be an important effect modifier when examining the association between  
24 erasure and sex. Female doctors who had received their PMQ in the UK had  
25 approximately one fifth of the odds of being erased, whereas female doctors who  
26 received their PMQ outside of the UK had approximately one third of the odds of  
27 being erased when compared to their male colleagues (see Table 7).

## 42 Discussion

43 In our large cross-sectional study we found strong evidence that being female was  
44 associated with a reduction in odds of receiving sanctions (OR 0.35, 95% CI: 0.32-  
45 0.38) in the unadjusted model. Controlling for years since PMQ, world region where  
46 received PMQ, and specialty did slightly increase this odds ratio (OR 0.37, 95% CI:  
47 0.33-0.41,  $P < 0.0001$ ), but there remained strong evidence for the association  
48 between doctor's sex and receiving sanctions. There was evidence that the  
49 association varied with specialty, with female GPs being the least likely to have  
50 sanctions against their registration. Post hoc analyses demonstrated the association  
51 between receiving a warning varied with specialty registration, with female specialists  
52 having less than half the odds of receiving a warning when compared to their male  
53  
54  
55  
56  
57  
58  
59  
60

1  
2  
3 colleagues, but no real evidence for a difference between the sexes and receiving a  
4 warning in doctors who had not yet specialised. Post hoc analyses also provided  
5 evidence to show that the odds of being erased from the medical register varied  
6 depending on where a doctor had received their PMQ, with female doctors who had  
7 received their PMQ in the UK being the least likely to be erased from the medical  
8 register.  
9  
10

11  
12  
13 To our knowledge this is the first study in the UK to examine the association between  
14 doctor's sex and receiving sanctions against medical registration, while adjusting for  
15 known confounders.  
16  
17

### 18 19 20 **Strengths and weaknesses of this study**

21 One of the major strengths of this study is that we used a large national database.  
22 The advantage of using this dataset is two-fold; firstly, because a national database  
23 was used the findings of the study apply to all doctors registered to practise in the  
24 UK; secondly, receiving sanctions is a rare outcome and using a large dataset is  
25 crucial when examining rare outcomes.  
26  
27

28 A further strength of this study is that it adjusted for known confounders. Previous  
29 research on UK data did not adjust the measure of effect of sex for potential  
30 confounders<sup>9</sup>.  
31  
32

33 Finally, a further advantage was the completeness of the dataset. The data is  
34 collected by the GMC for inclusion on the LRMP, and not research purposes.  
35 Doctors are required to provide the data to the GMC to be registered and as such  
36 there is no missing data. However, the fact the data is not collected for research  
37 purposes is also a limitation of the study. The study was constrained by the  
38 variables collected and made available by the GMC. As such, we were only able to  
39 explore the variables available and we were unable to examine the effect of other  
40 potential confounding factors.  
41  
42

43 It could be argued that the reason for referral to the GMC could be a source of  
44 residual confounding if systematic differences exist between the sexes. The GMC  
45 may take action against a doctor's registration for a number of reasons; including  
46 misconduct; poor performance; or physical or mental ill health. The data available  
47 did not provide the reasons for why a sanction had been imposed, but a more  
48 detailed evaluation of the reasons for referral to the GMC may go towards explaining  
49 the sex difference observed.  
50  
51

52 A further limitation is that a doctor can apply for voluntary erasure from the LRMP  
53 during an investigation process. Once again, this is a potential source of residual  
54  
55  
56  
57  
58  
59  
60

1  
2  
3 confounding and it is possible that the sex of doctors who are subject to a complaints  
4 investigation and apply for voluntary erasure differs to those doctors who complete  
5 the investigative process and receive a sanction (however, it is important to note that  
6 the GMC's decision to grant a request for voluntary erasure is based on the public  
7 interest and the doctor's health and likelihood to return to practise<sup>14</sup>).  
8  
9

### 10 11 12 **Comparison with other studies**

13 Several studies have examined the association between doctors' sex and disciplinary  
14 action, with the majority of these studies demonstrating that female doctors are less  
15 likely to be subject to disciplinary action than male doctors<sup>4,5,6,7,8,9</sup>. However, the  
16 majority of these studies have been performed in the United States of America,  
17 where the medical and legal systems differ to the UK and therefore we felt that their  
18 findings may not be applicable to the UK population of doctors. To our knowledge,  
19 one study has been performed in the UK using national data<sup>9</sup>, however when  
20 examining the association between doctors' sex and disciplinary action this study did  
21 not control for any potential confounders.  
22  
23

24 The findings of this study are in agreement with previous research that has shown  
25 that older doctors<sup>7</sup>, doctors who qualified outside of the country in which they are  
26 practising<sup>9,11</sup> and doctors of certain specialties<sup>6</sup> are more likely to be subjected to  
27 disciplinary action from a medical regulatory board. It has also been demonstrated in  
28 previous studies that female doctors are more likely to be have qualified more  
29 recently than male doctors<sup>3</sup>, are more likely to have qualified in the country in which  
30 they are practising<sup>15</sup> and choose different specialties to male doctors<sup>16</sup>.  
31  
32

33 This study showed that the reason that male doctors receive more sanctions is not  
34 because they qualified longer ago, nor because they are more likely to have qualified  
35 outside the UK, despite both of those factors being associated with increased  
36 likelihood of sanctions.  
37  
38

### 39 40 41 42 **Unanswered questions and future research**

43 This study has demonstrated that female doctors are less likely to receive sanctions  
44 against their medical registration compared to male doctors, however it is not clear  
45 why women are less likely to receive sanctions when compared to men. Exploring  
46 the possible reasons for this sex difference in professional performance is required,  
47 using a theoretical based approach. One theory suggested by some researchers is  
48 that male and female doctors differ in communication style and hence the interaction  
49 with patients and colleagues differed between the sexes, which could affect the risk  
50  
51  
52  
53  
54  
55  
56  
57  
58  
59  
60

1  
2  
3 of being subject to a complaint<sup>17,18</sup>. Future research could be performed to explore  
4 this further.  
5  
6

7  
8 We have also demonstrated that the effect of sex on likelihood to receive sanctions  
9 varied by specialty, with female GPs being the least likely to receive sanctions. It  
10 has been demonstrated by an observational study of primary care physicians in the  
11 USA that female primary care physicians spend more time with their patients when  
12 compared to their male colleagues and they engaged more in conversation,  
13 displaying more positive-talk, partnership-building, question-asking and information-  
14 giving<sup>19</sup>. These differences in communication style and time spent with patients may  
15 go towards explaining the larger sex discrepancy observed in GPs, however future  
16 research is required to explore these possible reasons further.  
17  
18  
19  
20  
21

22  
23 We have also shown that female specialists are much less likely than male  
24 specialists to receive a warning, but the sex difference disappears for doctors who  
25 have not yet specialised. The association between sex and the other types of  
26 sanctions was not found to vary with specialty registration. Examining why receiving  
27 warnings varies according to specialty registration, with a sex difference being  
28 observed in specialists, merits being explored. Possibilities include that the threshold  
29 for delivering a warning to a non-specialist is lower than for a specialist because it  
30 may be more likely that a non-specialist is at an early stage of their career and  
31 perhaps the medical regulatory body feel it is important to highlight that behaviour  
32 which demonstrates a significant departure from the principles of Good Medical  
33 Practice as set out by the GMC will be dealt with seriously and the warning may be  
34 hoped to act as a deterrent for any future more serious demonstrations of departure  
35 from the principles set out by the GMC.  
36  
37  
38  
39  
40  
41  
42  
43

44  
45 Our results have demonstrated that female doctors who qualified in the UK are the  
46 least likely to be erased from the medical register (the most severe sanction to be  
47 imposed). Female doctors who qualified outside of the UK are less likely to be  
48 erased from the medical register than their male colleagues who qualified outside of  
49 the UK, but they are more likely to be erased than their female colleagues who  
50 qualified in the UK. These results echo the findings of a cohort study conducted by  
51 Humphrey et al.<sup>11</sup> who demonstrated that referrals to the GMC concerning doctors  
52 who had received their PMQ outside of the UK was associated with the most severe  
53 sanctions on their registration (suspension or erasure).  
54  
55  
56  
57  
58  
59  
60

1  
2  
3 Our results also show that female doctors have approximately one third of the odds  
4 of being erased or suspended, and just over half the odds of receiving undertakings  
5 or conditions when compared to their male colleagues. These results suggest that,  
6 with the exception of the sanction 'warning', the more severe the sanction  
7 (suspension or erasure from the medical register) the more likely men will receive it.  
8 Exploring the reasons for this sex difference in the severity of sanctions imposed  
9 would be of interest. It is possible that male doctors' behaviour and actions warrant  
10 the severest types of sanctions to be imposed, whereas female doctors' behaviour  
11 and actions do not require such severe sanctions. Examining the reasons for why  
12 doctors have received sanctions would go towards showing whether this is in fact the  
13 case.  
14  
15  
16  
17  
18  
19

20  
21 It should also be noted that this study was observational in design and as such  
22 causality cannot be determined. It is possible that other factors, such as ethnicity,  
23 may be confounding the association between doctors' sex and disciplinary action.  
24 Research examining whether other potential confounders could explain the observed  
25 association is required.  
26  
27  
28  
29

30 Further exploration of why doctors' sex may impact their professional performance is  
31 needed to enable the profession to develop a better understanding of the factors  
32 associated with impaired fitness to practise and crucially, how to better support those  
33 doctors and ensure patient safety.  
34  
35  
36  
37

### 38 **Conclusion**

39 In this study we demonstrated that female doctors practising in the UK were less  
40 likely to receive sanctions on their medical registration when compared with their  
41 male colleagues. These findings remained after adjusting for known confounders.  
42 Reasons for why this sex difference exists needs to be examined.  
43  
44  
45  
46

### 47 **Acknowledgements**

48 We acknowledge Una Lane for facilitating access to the data and for answering our  
49 queries on the dataset. We acknowledge Andrew Ledgard for clarifying our queries  
50 on the dataset.  
51  
52  
53  
54  
55  
56  
57  
58  
59  
60

## Footnotes

**Contributorship statement:** EU conceived and designed the study with input from KW and JD. EU and CW categorised the data. EU analysed and interpreted the data with support from KW. EU drafted the manuscript and all authors participated in the revision process and have approved this submission for publication. EU is guarantor, had full access to all of the data in the study, and can take responsibility for the integrity of the data and the accuracy of the data analysis.

**Funding:** No specific funding was obtained for this study. EU is a PhD student, and recipient of a UCL Impact studentship. None of the funders influenced the conduct of this research.

**Competing interests:** All authors have completed the ICMJE uniform disclosure form at [www.icmje.org/coi\\_disclosure.pdf](http://www.icmje.org/coi_disclosure.pdf). All authors declare no competing interests that may be relevant to the submitted work.

**Ethical approval:** The study is part of a research project that has received ethical approval from the UCL Research Ethics Committee.

**Data sharing statement:** No additional data available.

**Transparency declaration:** EU, as guarantor, affirms that this manuscript is an honest, accurate and transparent account of the study being reported; that no important aspects of the study have been omitted; and that any discrepancies from the study as planned have been explained.

**Copyright:** The corresponding author has the right to grant on behalf of all authors and does grant on behalf of all authors, a worldwide licence to the Publishers and its licensees in perpetuity, in all forms, formats and media (whether known now or created in the future), to i) publish, reproduce, distribute, display and store the Contribution, ii) translate the Contribution into other languages, create adaptations, reprints, include within collections and create summaries, extracts and/or, abstracts of the Contribution, iii) create any other derivative work(s) based on the Contribution, iv) to exploit all subsidiary rights in the Contribution, v) the inclusion of electronic links from the Contribution to third party material where-ever it may be located; and, iv) licence any third party to do any or all of the above.



**Table 1:** Distribution of variables by sex of doctors.

| Variable                                           | Male<br>N=196,814 | Female<br>N=132,728 | Total<br>N=329,542 |
|----------------------------------------------------|-------------------|---------------------|--------------------|
| <b>Sanction imposed on registration</b>            |                   |                     |                    |
| No                                                 | 194,633 (98.9%)   | 132,212 (99.6%)     | 326,845 (99.2%)    |
| Yes                                                | 2,181 (1.1%)      | 516 (0.4%)          | 2,697 (0.8%)       |
| <b>No. of years since received PMQ<sup>i</sup></b> |                   |                     |                    |
| 0-2 years                                          | 6,332 (3.2%)      | 8,830 (6.7%)        | 15,162 (4.6%)      |
| 3-10 years                                         | 28,548 (14.5%)    | 37,220 (28.0%)      | 65,768 (20.0%)     |
| 11-20 years                                        | 52,437 (26.6%)    | 40,023 (30.2%)      | 92,460 (28.1%)     |
| 21-30 years                                        | 39,146 (19.9%)    | 23,069 (17.4%)      | 62,215 (18.9%)     |
| 31-40 years                                        | 30,206 (15.4%)    | 12,136 (9.1%)       | 42,342 (12.9%)     |
| ≥41 years                                          | 40,145 (20.4%)    | 11,450 (8.6%)       | 51,595 (15.7%)     |
| <b>Region where received PMQ</b>                   |                   |                     |                    |
| UK                                                 | 108,323 (55.0%)   | 86,989 (65.5%)      | 195,312 (59.3%)    |
| EEA <sup>ii</sup>                                  | 25,333 (12.9%)    | 15,880 (12.0%)      | 41,213 (12.5%)     |
| International                                      | 63,158 (32.1%)    | 29,859 (22.5%)      | 93,017 (28.2%)     |
| <b>Specialty</b>                                   |                   |                     |                    |
| No Specialty                                       | 94,815 (48.2%)    | 73,309 (55.2%)      | 168,124 (51.0%)    |
| Anaesthetics                                       | 8,710 (4.4%)      | 3,797 (2.9%)        | 12,507 (3.8%)      |
| EM <sup>iii</sup>                                  | 754 (0.4%)        | 209 (0.2%)          | 963 (0.3%)         |
| GP <sup>iv</sup>                                   | 37,959 (19.3%)    | 32,264 (24.3%)      | 70,223 (21.3%)     |
| Medicine                                           | 15,076 (7.7%)     | 6,775 (5.1%)        | 21,851 (6.6%)      |
| O&G <sup>v</sup>                                   | 2,934 (1.5%)      | 1,966 (1.5%)        | 4,900 (1.5%)       |
| Ophthalmology                                      | 2,508 (1.3%)      | 1,078 (0.8%)        | 3,586 (1.1%)       |
| Paediatrics                                        | 3,906 (2.0%)      | 3,891 (2.9%)        | 7,797 (2.4%)       |
| Pathology                                          | 5,589 (2.8%)      | 2,965 (2.2%)        | 8,554 (2.6%)       |
| Psychiatry                                         | 5,494 (2.8%)      | 3,077 (2.3%)        | 8,571 (2.6%)       |
| Radiology                                          | 172 (0.1%)        | 41 (0.03%)          | 213 (0.1%)         |
| Surgery                                            | 16,452 (8.4%)     | 1,942 (1.5%)        | 18,394 (5.6%)      |
| Other                                              | 1,330 (0.7%)      | 867 (0.7%)          | 2,197 (0.7%)       |
| Dual Specialty                                     | 1,115 (0.6%)      | 547 (0.4%)          | 1,662 (0.5%)       |

<sup>i</sup>Primary Medical Qualification<sup>ii</sup>European Economic Area<sup>iii</sup>Emergency Medicine<sup>iv</sup>General Practice<sup>v</sup>Obstetrics & Gynaecology

**Table 2:** The distribution of sanctions for each variable and the association of individual factors with sanctions.

| Variable                                           | Total number of doctors | Sanctions (%) | p-value |
|----------------------------------------------------|-------------------------|---------------|---------|
| <b>Sex</b>                                         |                         |               | <0.001  |
| Male                                               | 196,814                 | 1.1%          |         |
| Female                                             | 132,728                 | 0.4%          |         |
| <b>No. of years since received PMQ<sup>i</sup></b> |                         |               | <0.001  |
| 0-2                                                | 15,162                  | 0.1%          |         |
| 3-10                                               | 65,768                  | 0.6%          |         |
| 11-20                                              | 92,460                  | 0.8%          |         |
| 21-30                                              | 62,215                  | 1.1%          |         |
| 31-40                                              | 42,342                  | 1.4%          |         |
| ≥41                                                | 51,595                  | 0.7%          |         |
| <b>Region where received PMQ</b>                   |                         |               | <0.001  |
| UK                                                 | 195,312                 | 0.6%          |         |
| EEA <sup>ii</sup>                                  | 41,213                  | 0.9%          |         |
| International                                      | 93,017                  | 1.2%          |         |
| <b>Specialty</b>                                   |                         |               | <0.001  |
| No Specialty                                       | 168,124                 | 0.7%          |         |
| Anaesthetics                                       | 12,507                  | 0.7%          |         |
| EM <sup>iii</sup>                                  | 963                     | 0.7%          |         |
| GP <sup>iv</sup>                                   | 70,223                  | 1.2%          |         |
| Medicine                                           | 21,851                  | 0.5%          |         |
| O&G <sup>v</sup>                                   | 4,900                   | 1.2%          |         |
| Ophthalmology                                      | 3,586                   | 0.5%          |         |
| Paediatrics                                        | 7,797                   | 0.6%          |         |
| Pathology                                          | 8,554                   | 0.6%          |         |
| Psychiatry                                         | 8,571                   | 0.8%          |         |
| Radiology                                          | 213                     | 0.5%          |         |
| Surgery                                            | 18,394                  | 0.9%          |         |
| Other                                              | 2,197                   | 0.3%          |         |
| Dual Specialty                                     | 1,662                   | 1.4%          |         |

<sup>i</sup>Primary Medical Qualification<sup>ii</sup>European Economic Area<sup>iii</sup>Emergency Medicine<sup>iv</sup>General Practice<sup>v</sup>Obstetrics & Gynaecology

**Table 3:** The adjusted odds ratio for having sanctions against registration for each variable compared to its baseline having adjusted for all other variables.

| Variable                               | Adjusted OR <sup>i</sup> | 95% CI <sup>ii</sup> | p-value |
|----------------------------------------|--------------------------|----------------------|---------|
| <b>Sex of a doctor</b>                 |                          |                      |         |
|                                        |                          |                      | <0.0001 |
| Male                                   | 1                        |                      |         |
| Female                                 | 0.37                     | 0.33-0.41            |         |
| <b>No. of years since received PMQ</b> |                          |                      |         |
|                                        |                          |                      | <0.0001 |
| 0-2                                    | 1                        |                      |         |
| 3-10                                   | 3.42                     | 2.20-5.32            |         |
| 11-20                                  | 3.85                     | 2.48-5.98            |         |
| 21-30                                  | 5.66                     | 3.63-8.81            |         |
| 31-40                                  | 6.44                     | 4.13-10.05           |         |
| ≥41                                    | 3.12                     | 1.20-4.87            |         |
| <b>Region where received PMQ</b>       |                          |                      |         |
|                                        |                          |                      | <0.0001 |
| UK                                     | 1                        |                      |         |
| EEA                                    | 1.33                     | 1.17-1.50            |         |
| International                          | 1.65                     | 1.51-1.80            |         |
| <b>Specialty</b>                       |                          |                      |         |
|                                        |                          |                      | <0.0001 |
| No Specialty                           | 1                        |                      |         |
| Anaesthetics                           | 0.65                     | 0.52-0.82            |         |
| EM                                     | 0.66                     | 0.31-1.39            |         |
| GP                                     | 1.43                     | 1.29-1.58            |         |
| Medicine                               | 0.49                     | 0.40-0.60            |         |
| O&G                                    | 1.22                     | 0.93-1.59            |         |
| Ophthalmology                          | 0.53                     | 0.33-0.83            |         |
| Paediatrics                            | 0.64                     | 0.47-0.88            |         |
| Pathology                              | 0.65                     | 0.50-0.86            |         |
| Psychiatry                             | 0.81                     | 0.63-1.04            |         |
| Radiology                              | 0.47                     | 0.07-3.38            |         |
| Surgery                                | 0.78                     | 0.66-0.93            |         |
| Other                                  | 0.36                     | 0.17-0.77            |         |
| Dual Specialty                         | 1.37                     | 0.90-2.09            |         |

<sup>i</sup> Odds Ratio

<sup>ii</sup> Confidence Interval

**Table 4:** Stratum-specific odds ratios for having sanctions imposed on registration if the doctor is female for each specialty divided into four categories.

| Variable                  | Stratum-Specific OR <sup>i</sup> | 95% CI <sup>ii</sup> | p-value |
|---------------------------|----------------------------------|----------------------|---------|
| <b>Specialty Category</b> |                                  |                      |         |
|                           |                                  |                      | <0.0001 |
| No Specialty              | 0.43                             | 0.38-0.49            |         |
| GP                        | 0.26                             | 0.22-0.31            |         |
| Hospital Specialty        | 0.44                             | 0.36-0.56            |         |
| Dual Specialty            | 0.09                             | 0.13-0.70            |         |

<sup>i</sup> Odds Ratio

<sup>ii</sup> Confidence Interval

**Table 5:** The unadjusted and adjusted odds ratio for having each type of sanction against registration for a female doctor when compared to a male doctor.

| Sanction type | Model 1                     |                       | Model 2 <sup>i</sup>      |                       |
|---------------|-----------------------------|-----------------------|---------------------------|-----------------------|
|               | Unadjusted OR <sup>ii</sup> | 95% CI <sup>iii</sup> | Adjusted OR <sup>ii</sup> | 95% CI <sup>iii</sup> |
| Warning       | 0.29                        | 0.24-0.35             | 0.30                      | 0.25-0.36             |
| Undertakings  | 0.64                        | 0.52-0.79             | 0.66                      | 0.53-0.81             |
| Conditions    | 0.48                        | 0.39-0.59             | 0.54                      | 0.44-0.67             |
| Suspended     | 0.28                        | 0.21-0.36             | 0.32                      | 0.25-0.42             |
| Erased        | 0.21                        | 0.17-0.27             | 0.26                      | 0.21-0.34             |

<sup>i</sup> Model adjusted for number of years since received PMQ, region where received PMQ and specialty

<sup>ii</sup> Odds Ratio

<sup>iii</sup> Confidence Interval

**Table 6:** Stratum-specific odds ratios for having a warning imposed on registration if the doctor is female for each specialty divided into two categories.

| Variable                          | Stratum-Specific OR <sup>i</sup> | 95% CI <sup>ii</sup> | p-value |
|-----------------------------------|----------------------------------|----------------------|---------|
| <b>Specialty Category</b>         |                                  |                      | 0.0031  |
| No Specialty                      | 0.90                             | 0.67-1.20            |         |
| On Specialist and/or GP Registers | 0.48                             | 0.35-0.65            |         |

<sup>i</sup> Odds Ratio

<sup>ii</sup> Confidence Interval

**Table 7:** Stratum-specific odds ratios for being erased from the LRMP if the doctor is female for each region where received PMQ divided into two categories.

| Variable                                  | Stratum-Specific OR <sup>i</sup> | 95% CI <sup>ii</sup> | p-value |
|-------------------------------------------|----------------------------------|----------------------|---------|
| <b>Region where received PMQ Category</b> |                                  |                      | 0.0301  |
| EEA and/or International                  | 0.32                             | 0.24-0.44            |         |
| UK                                        | 0.18                             | 0.11-0.28            |         |

<sup>i</sup> Odds Ratio

<sup>ii</sup> Confidence Interval

## References

1. General Medical Council. *The state of medical education and practice in the UK*. London: GMC; 2012.
2. Dyer C. GMC and vulnerable doctors: too blunt an instrument? *BMJ* 2013; 347: f6230.
3. Elston MA. *Women and medicine: the future*. London: Royal College of Physicians; 2009.
4. Cardarelli R & Licciardone, JC. Factors associated with high-severity disciplinary action by a state medical board: a Texas study of medical license revocation. *JAOA* 2006; 106(3): 153-156.
5. Clay SW & Conaster RR. Characteristics of physicians disciplined by the State Medical Board of Ohio. *JAOA* 2003; 103(2): 81-88.
6. Khaliq AA, Dimassi H, Huang CY, Narine L & Smego RA Jr. Disciplinary action against physicians: who is likely to get disciplined? *The American Journal of Medicine* 2005; 118(7): 773-777.
7. Kohatsu ND, Gould D, Ross LK & Fox PJ. Characteristics associated with physician discipline: a case-control study. *Archives of Internal Medicine* 2004; 164(6): 653-658.
8. Morrison J & Wickersham P. Physicians disciplined by a State Medical Board. *JAMA* 1998; 279: 1889-1893.
9. Wakeford R. Who gets struck off? *BMJ* 2011; 343: d7842.
10. General Medical Council. *A guide for doctors referred to the GMC*. [http://www.gmc-uk.org/concerns/doctors\\_under\\_investigation/a\\_guide\\_for\\_referred\\_doctors.asp](http://www.gmc-uk.org/concerns/doctors_under_investigation/a_guide_for_referred_doctors.asp) (accessed December 2013)
11. Humphrey C, Hickman S & Gulliford MC. Place of medical qualification and outcomes of UK General Medical Council "fitness to practise" process: cohort study. *BMJ* 2011; 342: d1817.
12. European Union. *Countries*. [http://europa.eu/about-eu/countries/index\\_en.htm](http://europa.eu/about-eu/countries/index_en.htm) (accessed May 2013).
13. Von Elm E, Altman DG, Egger M, Pocock SJ, Gøtzsche PC & Vandenbroucke JP. The Strengthening the Reporting of Observational Studies in Epidemiology (STROBE) Statement: Guidelines for Reporting Observational Studies. *PLoS Med* 2007; 4(10): e296.
14. General Medical Council. *Guidance on making decisions on voluntary erasure applications*. GMC; 2013.
15. Lambert TW, Goldacre MJ & Parkhouse J. Doctors who qualified in the UK between 1974 and 1993: age, gender, nationality, marital status and family formation. *Medical Education* 1998; 32(5): 533-537.
16. Lambert TW, Goldacre MJ, Edwards C & Parkhouse J. Career preferences of doctors who qualified in the United Kingdom in 1993 compared with those doctors qualifying in 1974, 1977, 1980, and 1983. *BMJ* 1996; 313(7048): 19-24.
17. Taragin TI, Wilczek AP, Karns ME, Trout, R & Carson JL. Physician demographics and the risk of medical malpractice. *The American Journal of Medicine* 1992; 93(5): 537-542.
18. Firth-Cozens, J. Doctors with difficulties: why so few women? *Postgraduate Medical Journal* 2008; 84(992): 318-320.
19. Roter D, Lipkin M & Korsgaard A. Sex differences in patients' and physicians' communication during primary care medical visits. *Medical Care* 1991; 29(11): 1083-1093.

STROBE Statement—Checklist of items that should be included in reports of *cross-sectional studies*

|                              | Item No | Recommendation                                                                                                                                                                                               |     |
|------------------------------|---------|--------------------------------------------------------------------------------------------------------------------------------------------------------------------------------------------------------------|-----|
| <b>Title and abstract</b>    | 1       | (a) Indicate the study's design with a commonly used term in the title or the abstract                                                                                                                       | Y   |
|                              |         | (b) Provide in the abstract an informative and balanced summary of what was done and what was found                                                                                                          | Y   |
| <b>Introduction</b>          |         |                                                                                                                                                                                                              |     |
| Background/rationale         | 2       | Explain the scientific background and rationale for the investigation being reported                                                                                                                         | Y   |
| Objectives                   | 3       | State specific objectives, including any prespecified hypotheses                                                                                                                                             | Y   |
| <b>Methods</b>               |         |                                                                                                                                                                                                              |     |
| Study design                 | 4       | Present key elements of study design early in the paper                                                                                                                                                      | Y   |
| Setting                      | 5       | Describe the setting, locations, and relevant dates, including periods of recruitment, exposure, follow-up, and data collection                                                                              | Y   |
| Participants                 | 6       | (a) Give the eligibility criteria, and the sources and methods of selection of participants                                                                                                                  | Y   |
| Variables                    | 7       | Clearly define all outcomes, exposures, predictors, potential confounders, and effect modifiers. Give diagnostic criteria, if applicable                                                                     | Y   |
| Data sources/<br>measurement | 8*      | For each variable of interest, give sources of data and details of methods of assessment (measurement). Describe comparability of assessment methods if there is more than one group                         | Y   |
| Bias                         | 9       | Describe any efforts to address potential sources of bias                                                                                                                                                    | N/A |
| Study size                   | 10      | Explain how the study size was arrived at                                                                                                                                                                    | N/A |
| Quantitative variables       | 11      | Explain how quantitative variables were handled in the analyses. If applicable, describe which groupings were chosen and why                                                                                 | Y   |
| Statistical methods          | 12      | (a) Describe all statistical methods, including those used to control for confounding                                                                                                                        | Y   |
|                              |         | (b) Describe any methods used to examine subgroups and interactions                                                                                                                                          | Y   |
|                              |         | (c) Explain how missing data were addressed                                                                                                                                                                  | N/A |
|                              |         | (d) If applicable, describe analytical methods taking account of sampling strategy                                                                                                                           | N/A |
|                              |         | (e) Describe any sensitivity analyses                                                                                                                                                                        | N/A |
| <b>Results</b>               |         |                                                                                                                                                                                                              |     |
| Participants                 | 13*     | (a) Report numbers of individuals at each stage of study—eg numbers potentially eligible, examined for eligibility, confirmed eligible, included in the study, completing follow-up, and analysed            | N/A |
|                              |         | (b) Give reasons for non-participation at each stage                                                                                                                                                         | N/A |
|                              |         | (c) Consider use of a flow diagram                                                                                                                                                                           | N/A |
| Descriptive data             | 14*     | (a) Give characteristics of study participants (eg demographic, clinical, social) and information on exposures and potential confounders                                                                     | Y   |
|                              |         | (b) Indicate number of participants with missing data for each variable of interest                                                                                                                          | N/A |
| Outcome data                 | 15*     | Report numbers of outcome events or summary measures                                                                                                                                                         | Y   |
| Main results                 | 16      | (a) Give unadjusted estimates and, if applicable, confounder-adjusted estimates and their precision (eg, 95% confidence interval). Make clear which confounders were adjusted for and why they were included | Y   |

|                          |    |                                                                                                                                                                            |     |
|--------------------------|----|----------------------------------------------------------------------------------------------------------------------------------------------------------------------------|-----|
|                          |    | (b) Report category boundaries when continuous variables were categorized                                                                                                  | Y   |
|                          |    | (c) If relevant, consider translating estimates of relative risk into absolute risk for a meaningful time period                                                           | N/A |
| Other analyses           | 17 | Report other analyses done—eg analyses of subgroups and interactions, and sensitivity analyses                                                                             | Y   |
| <b>Discussion</b>        |    |                                                                                                                                                                            |     |
| Key results              | 18 | Summarise key results with reference to study objectives                                                                                                                   | Y   |
| Limitations              | 19 | Discuss limitations of the study, taking into account sources of potential bias or imprecision. Discuss both direction and magnitude of any potential bias                 | Y   |
| Interpretation           | 20 | Give a cautious overall interpretation of results considering objectives, limitations, multiplicity of analyses, results from similar studies, and other relevant evidence | Y   |
| Generalisability         | 21 | Discuss the generalisability (external validity) of the study results                                                                                                      | Y   |
| <b>Other information</b> |    |                                                                                                                                                                            |     |
| Funding                  | 22 | Give the source of funding and the role of the funders for the present study and, if applicable, for the original study on which the present article is based              | Y   |

\*Give information separately for exposed and unexposed groups.

**Note:** An Explanation and Elaboration article discusses each checklist item and gives methodological background and published examples of transparent reporting. The STROBE checklist is best used in conjunction with this article (freely available on the Web sites of PLoS Medicine at <http://www.plosmedicine.org/>, Annals of Internal Medicine at <http://www.annals.org/>, and Epidemiology at <http://www.epidem.com/>). Information on the STROBE Initiative is available at [www.strobe-statement.org](http://www.strobe-statement.org).

# BMJ Open

**Disciplined doctors: does the sex of a doctor matter?  
A cross-sectional study examining the association between  
a doctor's sex and receiving sanctions against their medical  
registration.**

|                                    |                                                                                                                                                                                                                                                              |
|------------------------------------|--------------------------------------------------------------------------------------------------------------------------------------------------------------------------------------------------------------------------------------------------------------|
| Journal:                           | <i>BMJ Open</i>                                                                                                                                                                                                                                              |
| Manuscript ID:                     | bmjopen-2014-005405.R1                                                                                                                                                                                                                                       |
| Article Type:                      | Research                                                                                                                                                                                                                                                     |
| Date Submitted by the Author:      | 17-Jun-2014                                                                                                                                                                                                                                                  |
| Complete List of Authors:          | Unwin, Emily; University College London, UCL Medical School<br>Woolf, Katherine; University College London, UCL Medical School<br>Wadlow, Clare; University College London, UCL Medical School<br>Dacre, Jane; University College London, UCL Medical School |
| <b>Primary Subject<br>Heading</b>: | Medical education and training                                                                                                                                                                                                                               |
| Secondary Subject Heading:         | Health services research, Epidemiology                                                                                                                                                                                                                       |
| Keywords:                          | LAW (see Medical Law), MEDICAL EDUCATION & TRAINING,<br>EPIDEMIOLOGY, GMC, Gender                                                                                                                                                                            |
|                                    |                                                                                                                                                                                                                                                              |

SCHOLARONE™  
Manuscripts



## Title Page

### **Disciplined doctors: does the sex of a doctor matter? A cross-sectional study examining the association between a doctor's sex and receiving sanctions against their medical registration.**

Emily Unwin, Katherine Woolf, Clare Wadlow, Jane Dacre

#### **Corresponding author:**

Prof Jane Dacre, Director UCL Medical School  
UCL Medical School, 74 Huntley Street. London, WC1E 6AU. UK  
j.dacre@ucl.ac.uk  
Tel: 020 7679 0894  
Fax: 020 7679 0890

Dr Emily Unwin, PhD student  
UCL Medical School, Royal Free Hospital, London, NW3 2PF. UK

Dr Katherine Woolf, Lecturer  
UCL Medical School, Royal Free Hospital, London, NW3 2PF. UK

Dr Clare Wadlow, Clinical training fellow  
UCL Medical School, Royal Free Hospital, London, NW3 2PF. UK

#### **Key words:**

Law, Medical education & training, epidemiology, GMC, gender

#### **Word count:**

4432

## Abstract

**Objectives:** To examine the association between doctors' sex and receiving sanctions on their medical registration, whilst controlling for other potentially confounding variables.

**Design:** Cross-sectional study.

**Setting:** The General Medical Council's (GMC) List of Registered Medical Practitioners (LRMP) database of doctors practising in the United Kingdom (UK).

**Population:** All doctors on the GMC's LRMP on 29<sup>th</sup> May 2013. The database included all doctors who are or have been registered to practice medicine in the UK since October 2005. The exposure of interest was doctor's sex. Confounding variables included years since primary medical qualification, world region of primary medical qualification and specialty.

**Outcome measures:** Sanctions on a doctor's medical registration. Sanction types included warning, undertakings, conditions, suspension or erasure from the register. Binary logistic regression modelling, controlling for the confounders, described the association between doctor's sex and sanctions on a doctor's medical registration.

**Results:** Of the 329,542 doctors on the LRMP, 2,697 doctors (0.8%) had sanctions against their registration, 516 (19.1%) of whom were female. In the fully adjusted model, female doctors had nearly a third of the odds (OR 0.37, 95% CI: 0.33-0.41) of having sanctions compared to male doctors. There was evidence that the association varies with specialty, with female doctors who had specialised as General Practitioners (GPs) being the least likely to receive sanctions compared to their male colleagues (OR 0.26, 95% CI: 0.22-0.31).

**Conclusions:** Female doctors have reduced odds of receiving sanctions on their medical registration when compared to their male colleagues. This association remained after adjustment for the confounding factors. These results are representative of all doctors registered to practice in the UK. Further exploration of why doctors' sex may impact their professional performance is underway.

## Article summary

### Strengths and limitations of this study

- We used a large national database with no missing data, so the findings of the study apply to all doctors registered to practise in the UK.
- Receiving sanctions is a rare outcome and using a large dataset is crucial when examining rare outcomes.
- This is one of the first studies of this nature on UK data that adjusted for known confounders.
- The study was constrained by the variables collected and made available by the GMC. So we were unable to examine the effect of other potential confounding factors.
- The data available did not provide the reasons for why a sanction had been imposed, nor data on those granted voluntary erasure. A more detailed evaluation of the reasons for referral to the GMC may go towards explaining the sex difference observed.

## Introduction

The number of complaints about doctors' fitness to practise received by the UK medical regulatory body, the General Medical Council (GMC), has been increasing since 2007<sup>1</sup>. Following a triage and investigation process by the GMC the outcome of a case against a doctor can be closed, or can result in a sanction against the doctor's registration. The cost of this regulatory process, both in terms of financial cost of the actual complaints investigation procedure, but also in terms of the loss of the medical workforce during the process, can be significant. The level of stress that a doctor endures while undergoing a fitness to practise investigation was recently reported in the BMJ and highlights the impact the complaints investigation procedure can have on the mental well being of doctors<sup>2</sup>.

One of the most significant changes in the medical profession has been the increase in the number of women entering this previously male dominated profession. The number of female medical students has been increasing since the mid-1960s with female medical students outnumbering male medical students since the mid-1990s<sup>3</sup>. It is predicted that female doctors will outnumber their male colleagues by 2017<sup>3</sup>. This change in the demographic profile of UK doctors has brought with it a heightened interest in how the increase of female doctors may impact the profession.

Examining and understanding the predictors of doctors receiving sanctions may aid the medical profession in identifying doctors whose performance might raise future concerns, in order to support these doctors and help prevent GMC referral. Research from Canada, the United States of America and Australia and New Zealand has suggested that male and female doctors differ in terms of risk of disciplinary action, with male doctors being at increased risk<sup>4,5,6,7,8,9,10</sup>. However, the applicability of the findings from these studies to the UK may be limited due to differences in both the medical and legal systems in these countries. In 2011 Wakeford explored the situation in the UK<sup>11</sup>. He examined the factors associated with severest outcomes of the GMC disciplinary procedures, suspension or erasure from the medical register. In agreement with these worldwide studies, he demonstrated that female doctors were four times less likely to be disciplined when compared to male doctors. However, the interpretation of this finding is limited because the measure of effect for doctors' sex was not adjusted for potential confounders.

1  
2  
3 We aimed to examine the effect of doctors' sex on receiving sanctions against their  
4 medical registration, while adjusting for known confounding factors. This would allow  
5 for a meaningful comparison of male and female doctors and their experience of  
6 disciplinary action in the UK.  
7  
8  
9

## 10 **Methods**

### 11 **Study design, setting and source of data**

12 We conducted a cross-sectional study using UK-wide data. The data and permission  
13 to use the data for research purposes were obtained from the GMC. This study is  
14 part of a research project that has received ethical approval from the UCL Research  
15 Ethics Committee.  
16  
17

18 Under the Medical Act 1983 the GMC is required to keep up-to-date registers of  
19 qualified doctors. The main register is the List of Registered Medical Practitioners  
20 (LRMP). The LRMP is a list of all doctors registered to practise medicine in the UK,  
21 and as such changes daily. It lists those doctors who are (or could) practise  
22 medicine, as well as those doctors who have been suspended or erased. The GMC  
23 provided us with a snapshot of doctors registered on the LRMP on the 29<sup>th</sup> May  
24 2013. The list included all doctors who have been registered with the GMC (and  
25 therefore eligible to actively practise medicine) at any point in the period 20<sup>th</sup> October  
26 2005<sup>a</sup> – 28<sup>th</sup> May 2013. The different categories of registration status included:  
27 provisionally or fully registered; suspended; not registered – administrative reason, or  
28 deceased, or having relinquished registration; and not registered – erased after  
29 Fitness to Practise panel hearing. The database provided details of doctor's sex; the  
30 year, country, and institutions of the doctor's primary medical qualification and the  
31 doctor's current registration status, including whether they currently had any  
32 sanctions on their medical registration (see below for details). It classified doctors as  
33 General Practitioners (GPs) (on the GP register) and as hospital specialists (on the  
34 Specialist register). Doctors who are neither on the GP or Specialist registers are  
35 doctors who have not undertaken or completed speciality training.  
36  
37  
38  
39  
40  
41  
42  
43  
44  
45  
46  
47

### 48 **Population**

49 All doctors who were listed on the LRMP on the 29<sup>th</sup> May 2013 were included.  
50  
51

### 52 **Primary outcome and exposure**

---

53  
54  
55  
56  
57 <sup>a</sup> The 20<sup>th</sup> October 2005 was the date when the GMC first began to publish full details of a doctor's  
58 registration status on the LRMP online.  
59  
60

1  
2  
3 The outcome of interest was sanctions on a doctor's medical registration on the 29<sup>th</sup>  
4 May 2013.

5  
6 The types of sanctions included:

- 7  
8
- 9 • **Warning:** issued when a doctor's performance has not been in keeping with  
10 the principles set by the GMC for doctors, but a restriction on the doctor's  
11 registration is not necessary. Warnings remain on the LRMP for a five year  
12 period;
  - 13 • **Undertakings:** an agreement between the GMC and the doctor about the  
14 doctor's future practice. The doctor must adhere to these undertakings to  
15 maintain their registration;
  - 16 • **Conditions:** set out by the GMC and restrict a doctor's practice. The doctor  
17 must comply with these conditions to maintain their registration. Conditions  
18 can initially be imposed for a maximum of three years and then be renewed in  
19 periods of up to 36 months;
  - 20 • **Suspension or erasure:** the doctor's licence is withdrawn by the GMC and  
21 they are no longer able to practise. Suspension from the register can last up  
22 to 12 months, but may be indefinite in certain circumstances.
- 23  
24  
25  
26  
27  
28

29 A sanction can be imposed if a doctor's fitness to practise has been proved to be  
30 impaired. The impairment can result from misconduct; poor professional  
31 performance; physical or mental ill health; or a conviction or fitness to practise  
32 determination by another regulatory body either in the UK or overseas<sup>12</sup>. However it  
33 is recognised that the reason for impairment can cross more than one category (for  
34 example a doctor with a drug misuse problem could be classified as having mental ill  
35 health, yet the effects of the drug abuse could impact their professional  
36 performance). The duration of a sanction on a doctor's registration varies and it is  
37 possible for doctors to have more than one sanction against their registration and this  
38 typically represents the outcomes of different complaints. It was not possible to  
39 establish the date a sanction was imposed or the reason for why a sanction had  
40 been imposed from the available data.

41  
42  
43  
44  
45  
46  
47  
48

49 The outcome of interest was collapsed into a binary variable: doctors with sanctions  
50 against their registration; and doctors with no sanctions against their registration.

51  
52

53 The exposure of interest was doctor's sex, as declared by the doctor to the GMC.

54  
55  
56  
57  
58  
59  
60

### Selection of variables

The variables included in the study were selected before any statistical analysis. Data was available on the year of primary medical qualification (PMQ), country of PMQ and primary specialty, if on the Specialist or General Practitioner (GP) Registers. These variables were selected as a priori confounders based on findings from earlier research<sup>7,8,11,13</sup>, which demonstrated that these factors may influence the risk of receiving sanctions.

Once the variables had been selected, we performed a variable reduction process, to reduce the number categories into meaningful categories. Once again, this was performed before any statistical analysis. The variable 'year of PMQ' was converted into 'number of years since qualification' by subtracting the year of PMQ from 2013<sup>b</sup>. We then collapsed the variable into six categories. The first category '0-2 years' represented Foundation Training, the second category '3-10 years' represented the bulk of time a doctor would likely spend in Specialty Training. The subsequent categories were divided into 10-year blocks. The variable 'country of PMQ' was collapsed into three categories; 'UK', 'EEA' (European Economic Area) and 'International'. The list of countries included in the EEA category was obtained from the European Union website<sup>14</sup> and included all countries that were members before May 2013. The variable 'specialty' was divided into fourteen categories. Doctors who were not present on either the Specialist Register or the GP Register were categorised as having 'no specialty' and represented trainee and other non-specialist doctors. Doctors on both the Specialist Register and the GP Register were recorded as having 'dual specialty' and doctors only on the GP register were categorised as 'GP'. For doctors only registered on the Specialist Register, their primary specialty was taken and recorded into one of eleven categories. To categorise those doctors on the Specialist Register two researchers (EU and CW) independently allocated each primary specialty to a specialty category. Kappa statistic demonstrated a good level of agreement (kappa = 0.72). Any disagreements about specialty category allocation were resolved through discussion.

### Statistical methods

We took a causal modelling analysis approach to analyse the data. We firstly performed bivariate analyses to look for crude associations in the data, followed by Mantel-Haenszel analyses, before going on to complete multivariate analyses using

---

<sup>b</sup> As mentioned above, a doctor could appear in the LRMP dataset if they had been removed from the medical register. The actual date of those doctors being removed could lie anytime between 20<sup>th</sup> October 2005 and 28<sup>th</sup> May 2013. However, as no actual removal dates were given for those doctors, we used 2013 for all doctors.

1  
2  
3 binary logistic regression modelling. The initial logistic regression model included  
4 only the exposure (sex) and outcome (sanctions) variables to provide a crude  
5 measure of effect. The final logistic regression model was built to include all  
6 potential confounder variables, while checking for multicollinearity. The final logistic  
7 regression model enabled the calculation of an adjusted measure of effect. The final  
8 regression model enabled the calculation of an adjusted measure of effect. The final  
9 model was assessed for the presence of effect modifiers following the findings from  
10 the Mantel-Haenszel analyses.  
11  
12

13  
14  
15 Statistical analyses were conducted using the software Stata 12/SE.  
16

17  
18 We used the STROBE Statement<sup>15</sup> to guide our study report.  
19

## 20 21 **Results**

22  
23 There were 329,542 doctors on the LRMP on the 29<sup>th</sup> May 2013, of whom 40.3%  
24 were female. Table 1 shows the distribution of variables by the sex of doctors. The  
25 median number of years since qualification was 19 years. The distribution of the  
26 number of years since a doctor had qualified was skewed to the right with the  
27 majority of the doctors qualifying 11-20 years ago (28.1%). The majority of the  
28 doctors had received their PMQ from a UK medical school (59.3%).  
29

30  
31 Approximately half of all the doctors were neither on the GP Register nor the  
32 Specialist Register (51.0%), of which the majority (58.0%) had received their PMQ  
33 greater than 10 years previously. It is interesting to note that half of the doctors  
34 registered to practise medicine in the UK in this period were not registered specialists  
35 (they were neither on the GP or Specialist registers) and the majority of these  
36 doctors had qualified greater than ten years ago, suggesting that these doctors are  
37 not trainee doctors, but doctors who have elected not to complete specialty training.  
38 Of those doctors who had specialised, General Practice was the most popular  
39 specialty (21.3%), followed by Medicine (6.6%). 0.5% of the doctors were on both  
40 the Specialist and GP Registers.  
41  
42  
43  
44  
45  
46  
47

48  
49 2697 (0.8%) doctors had sanctions against their registration on the 29<sup>th</sup> May 2013.  
50 There was a higher proportion of male doctors who had sanctions against their  
51 registration when compared to female doctors (1.1% of all male doctors compared  
52 with 0.4% of all female doctors,  $X^2=505.4$ ,  $P<0.001$ ). There was strong evidence for  
53 an association between receiving sanctions and the number of years since received  
54 PMQ, with doctors who qualified 31-40 years ago having the highest proportion of  
55 sanctions; world region of PMQ, with doctors who qualified outside the EEA with the  
56  
57  
58  
59  
60



1  
2  
3 highest proportion of doctors with sanctions; and specialty, with doctors on both the  
4 Specialist and GP Registers having the highest proportion of doctors with sanctions.  
5  
6 These results are presented in Table 2.  
7

8  
9 Using bivariate analyses we compared female doctors to male doctors. There was a  
10 strong trend between sex of a doctor and the number of years since the doctor  
11 received their PMQ, with female doctors being more likely to have recently qualified  
12 and the proportion of female doctors reducing as the number of years since PMQ  
13 increased. We also found that female doctors were more likely to have qualified in  
14 the UK (65.5% of all female doctors compared to 55.0% of all male doctors) and  
15 male doctors were more likely to have qualified outside of the EEA (32.1% of all male  
16 doctors compared to 22.5% of all female doctors). Approximately equal proportions  
17 of male and female doctors qualified in the EEA (12.9% and 12.0% respectively).  
18 Both sexes were more likely to be not registered in a specialty (GP or hospital),  
19 though there was a slightly higher proportion of women when compared to men who  
20 were not on the Specialist or GP Registers. When examining those doctors who  
21 were registered in a specialty, a higher proportion of female doctors were on the GP  
22 Register compared to male doctors (24.3% of female doctors compared with 19.3%  
23 of male doctors) and a higher proportion of male doctors were registered with a  
24 hospital specialty (32.0% of male doctors compared with 20.1% of female doctors).  
25 In summary, number of years since received PMQ, world region where PMQ was  
26 received, and registered specialty were associated with both the outcome (sanctions)  
27 and the exposure (sex of a doctor) and as such we considered these variables as  
28 confounders.  
29  
30  
31  
32  
33  
34  
35  
36  
37  
38  
39

40  
41 The unadjusted odds ratio for having sanctions against a doctor's registration  
42 comparing female doctors with male doctors was 0.35 (95% CI: 0.32-0.38),  
43 suggesting that being a female doctor is protective of receiving sanctions.  
44

45 Mantel-Haenszel analyses and tests of homogeneity were conducted to examine the  
46 change in the strength of the association between sanctions and sex while controlling  
47 for each of the confounders separately.  
48

49 There was strong evidence that the true odds ratios were different between the  
50 different specialty categories ( $P=0.0002$ ), therefore specialty was considered as an  
51 effect modifier when conducting multivariate analyses.  
52  
53  
54  
55

56 Table 3 represents the results from the binary logistic regression model built to adjust  
57 for all the variables. After taking into account the number of years since PMQ, world  
58  
59  
60

1  
2  
3 region where the doctor received their PMQ and specialty, female doctors had nearly  
4 a third of the odds of having sanctions on their registration compared to male doctors  
5 (OR 0.37, 95% CI: 0.33-0.41,  $P < 0.0001$ ).

6  
7 All of the a priori confounders were felt to be confounders because the adjusted odds  
8 ratio changed when each variable was added to the model. We found no evidence  
9 of multicollinearity.

10  
11 The Mantel-Haenszel analyses suggested that specialty may be an effect modifier,  
12 we therefore performed a statistical test for effect modification by firstly collapsing the  
13 specialty variable into four groups to increase the power of the test. Table 4  
14 demonstrates that specialty was felt to be an important effect modifier with female  
15 doctors being less likely to receive sanctions when compared to male doctors, but  
16 the effect was greater for GPs than for those doctors with no specialty or practising a  
17 hospital specialty.

## 23 24 **Discussion**

25  
26 In our large cross-sectional study we found strong evidence that being female was  
27 associated with a reduction in odds of receiving sanctions (OR 0.35, 95% CI: 0.32-  
28 0.38) in the unadjusted model. Controlling for years since PMQ, world region where  
29 received PMQ, and specialty did slightly increase this odds ratio (OR 0.37, 95% CI:  
30 0.33-0.41,  $P < 0.0001$ ), but there remained strong evidence for the association  
31 between doctor's sex and receiving sanctions. There was evidence that the  
32 association varied with specialty, with female GPs being the least likely to have  
33 sanctions against their registration.

34  
35 To our knowledge this is the first study in the UK to examine the association between  
36 doctor's sex and receiving sanctions against medical registration, while adjusting for  
37 known confounders. We believe that these known confounders have only been  
38 adjusted for in one other study which was conducted in the USA<sup>8</sup>.

## 39 40 **Strengths and weaknesses of this study**

41  
42 One of the major strengths of this study is that we used a large national database.  
43 The advantage of using this dataset is two-fold; firstly, because a national database  
44 was used the findings of the study apply to all doctors registered to practise in the  
45 UK; secondly, receiving sanctions is a rare outcome and using a large dataset is  
46 crucial when examining rare outcomes.

1  
2  
3 A further strength of this study is that it adjusted for known confounders, all these  
4 confounders have only been adjusted for in one previous study, which was  
5 conducted in California<sup>8</sup>. Previous research on UK data did not adjust the measure  
6 of effect of sex for potential confounders<sup>11</sup>.  
7

8  
9 Finally, a further advantage was the completeness of the dataset. The data is  
10 collected by the GMC for inclusion on the LRMP, and not research purposes.  
11 Doctors are required to provide the data to the GMC to be registered and as such  
12 there is no missing data. However, the fact the data is not collected for research  
13 purposes is also a limitation of the study. The study was constrained by the  
14 variables collected and made available by the GMC. As such, we were only able to  
15 explore the variables available and we were unable to examine the effect of other  
16 potential confounding factors or explore the reasons for why a sanction had been  
17 imposed.  
18

19  
20 It could be argued that the reason for referral to the GMC could be a source of  
21 residual confounding if systematic differences exist between the sexes. The GMC  
22 may take action against a doctor's registration for a number of reasons, which can be  
23 broadly divided into three major categories; misconduct; poor professional  
24 performance; or physical or mental ill health. The data available did not provide the  
25 reasons or the category for why a sanction had been imposed, but a more detailed  
26 evaluation of the reasons for referral to the GMC may go towards explaining the sex  
27 difference observed. In their research, Alam et al.<sup>4</sup> and Elkin et al.<sup>10</sup>, demonstrated  
28 not only that male doctors were more likely to be subject to disciplinary action, but  
29 that the main offense for which a doctor was being disciplined was sexual  
30 misconduct. It is possible that male doctors are more likely to commit an offense  
31 involving sexual misconduct than their female colleagues, which may go towards  
32 explaining the sex difference seen in these populations. However, other studies in  
33 this area did not find sexual misconduct to be the most common offense<sup>6,7,9</sup>. As  
34 such, exploring the offenses for which a doctor may receive disciplinary action in this  
35 population may go towards explaining the sex difference observed and may help the  
36 regulatory body and medical profession to introduce targeted interventions, such as  
37 education programmes, to reduce the number of offenses.  
38

39  
40 A further source of residual confounding could be the route of referral. Doctors  
41 practising in the UK can be referred to the GMC through five main routes; the public;  
42 employers; doctors; the GMC; and the police<sup>16</sup>. It would be interesting to examine  
43 whether the referral rate for each route demonstrates any sex differences, and if so,  
44 exploring the reasons for this difference.  
45  
46  
47  
48  
49  
50  
51  
52  
53  
54  
55  
56  
57  
58  
59  
60

1  
2  
3 A further limitation is that a doctor can apply for voluntary erasure from the LRMP  
4 during an investigation process. Once again, this is a potential source of residual  
5 confounding and it is possible that the sex of doctors who are subject to a complaints  
6 investigation and apply for voluntary erasure differs to those doctors who complete  
7 the investigative process and receive a sanction (however, the GMC's decision to  
8 grant a request for voluntary erasure is based on the public interest and the doctor's  
9 health and likelihood to return to practise<sup>17</sup>). It is important to note that voluntary  
10 erasure is requested by doctors for multiple reasons other than being involved in an  
11 investigation process, including retiring permanently from practising medicine or  
12 leaving the UK to work permanently abroad. To explore whether voluntary erasure  
13 requests may explain the sex difference seen, the reason for why a voluntary erasure  
14 request was submitted would first have to be ascertained. This information was not  
15 available in the dataset used for this research, but could be requested and explored  
16 in future studies.  
17  
18  
19  
20  
21  
22  
23

24 It is also of interest to note that certain sanctions (erasure and some suspensions)  
25 are permanent, whereas other sanctions are time limited. As such, the permanent  
26 sanctions may be over represented because they will never be removed from a  
27 doctor's registration. If male doctors are more likely to receive these permanent  
28 sanctions, this could lead to male doctors being over represented when examining  
29 the association between sex and sanctions, and may go towards explaining the sex  
30 difference observed between doctors who had sanctions imposed against their  
31 registration.  
32  
33  
34  
35  
36  
37  
38  
39

#### 40 **Comparison with other studies**

41 Our main finding, that female doctors are less likely to be subject to disciplinary  
42 action when compared to their male colleagues, mirrors the results of several studies  
43 from across the world which have also examined the association between doctors'  
44 sex and disciplinary action<sup>4,6,7,8,9,10,11</sup>. However, the majority of these studies have  
45 been performed in the United States of America<sup>6,7,8,9</sup>, Canada<sup>4</sup>, Australia and New  
46 Zealand<sup>10</sup>, where the medical and legal systems differ to the UK and therefore we felt  
47 that their findings may not be applicable to the UK population of doctors. These  
48 studies' main objective was not necessarily to explore the association between  
49 doctors' sex and disciplinary action. Some of these studies were descriptive and  
50 those studies that did control for confounders did not, albeit for one study<sup>8</sup>, control for  
51 the same confounders we have selected. To our knowledge, one study has been  
52 performed in the UK using national data<sup>11</sup>, however when examining the association  
53  
54  
55  
56  
57  
58  
59  
60

1  
2  
3 between doctors' sex and disciplinary action this study did not control for any  
4 potential confounders.

5  
6 The findings of this study are in agreement with previous research that has shown  
7 that older doctors<sup>8</sup>, doctors who qualified outside of the country in which they are  
8 practising<sup>11,13</sup> and doctors of certain specialties<sup>7</sup> are more likely to be subjected to  
9 disciplinary action from a medical regulatory board. It has also been demonstrated in  
10 previous studies that female doctors are more likely to have qualified more  
11 recently than male doctors<sup>3</sup>, are more likely to have qualified in the country in which  
12 they are practising<sup>18</sup> and choose different specialties to male doctors<sup>19</sup>.

13  
14 This study showed that the reason that male doctors receive more sanctions is not  
15 because they qualified longer ago, nor because they are more likely to have qualified  
16 outside the UK, despite both of those factors being associated with increased  
17 likelihood of sanctions.  
18  
19  
20  
21  
22  
23

#### 24 **Unanswered questions and future research**

25  
26 This study has demonstrated that female doctors are less likely to receive sanctions  
27 against their medical registration compared to male doctors, however it is not clear  
28 why women are less likely to receive sanctions when compared to men. Exploring  
29 the possible reasons for this sex difference in professional performance is required,  
30 using a theoretical based approach. One theory suggested by some researchers is  
31 that male and female doctors differ in communication style and hence the interaction  
32 with patients and colleagues differed between the sexes, which could affect the risk  
33 of being subject to a complaint<sup>20,21</sup>. Future research could be performed to explore  
34 this further and examine whether communication styles differ between male and  
35 female doctors, and also whether the communication styles of doctors who receive  
36 sanctions differ from doctors who have never received sanctions.  
37  
38  
39  
40  
41  
42  
43

44 We have also demonstrated that the effect of sex on likelihood to receive sanctions  
45 varied by specialty, with female GPs being the least likely to receive sanctions. It  
46 has been demonstrated by an observational study of primary care physicians in the  
47 USA that female primary care physicians spend more time with their patients when  
48 compared to their male colleagues and they engaged more in conversation,  
49 displaying more positive-talk, partnership-building, question-asking and information-  
50 giving<sup>22</sup>. These differences in communication style and time spent with patients may  
51 go towards explaining the larger sex discrepancy observed in GPs, however future  
52 research is required to explore these possible reasons further.  
53  
54  
55  
56  
57  
58  
59  
60

1  
2  
3 Our results show that doctors who had been qualified for longer were more likely to  
4 receive sanctions, it is therefore reasonable to hypothesise that the risk of receiving a  
5 sanction increases with exposure. Therefore doctors who work part-time or have  
6 fewer patient encounters may be less likely to receive sanctions against their  
7 registration. Previous studies have demonstrated that female consultants have fewer  
8 patient episodes and are more likely to work part-time when compared to their male  
9 colleagues<sup>23,24</sup>, it is therefore reasonable to hypothesise that the sex difference  
10 observed in disciplinary action may be partly explained by the difference in work  
11 patterns between the sexes. This hypothesis merits being explored further by  
12 examining whether those doctors who receive sanctions are more likely to work full-  
13 time and have more patient encounters than those doctors who have never received  
14 sanctions.

15  
16  
17  
18  
19  
20  
21  
22  
23 A further possible explanation for the sex difference observed is perhaps that male  
24 and female doctors are viewed and treated differently by the public, the profession  
25 and the regulatory body. It is possible that there is a higher threshold of tolerance for  
26 female doctors. The GMC are twice as likely to receive a complaint about a male  
27 doctor than a female doctor<sup>16</sup>. It is reasonable to assume that as a result male  
28 doctors are more likely to receive sanctions against their medical registration.  
29 Research examining the perception of male and female doctors would be warranted.

30  
31  
32  
33  
34  
35 It should also be noted that this study was observational in design and as such  
36 causality cannot be determined. It is possible that other factors, such as ethnicity,  
37 may be confounding the association between doctors' sex and disciplinary action.  
38 Research examining whether other potential confounders could explain the observed  
39 association is required

40  
41  
42  
43  
44 The points discussed above highlight that the real interest of this research is not  
45 about the outcome sanctions itself, but about trying to understand the differences  
46 between male and female doctors that lead to the observed sex difference in  
47 receiving sanctions. Investigations into why and how male and female medical  
48 practises differ will in turn lead to being able to propose interventions to reduce not  
49 only the number of doctors referred to the medical regulatory body, but also the  
50 difference between the sexes of doctors who are referred. Further exploration of why  
51 doctors' sex may impact their professional performance is needed to enable the  
52 profession to develop a better understanding of the factors associated with impaired  
53  
54  
55  
56  
57  
58  
59  
60

1  
2  
3 fitness to practise and crucially, how to better support those doctors and ensure  
4 patient safety.  
5  
6  
7

### 8 9 **Conclusion**

10 In this study we demonstrated that female doctors practising in the UK were less  
11 likely to receive sanctions on their medical registration when compared with their  
12 male colleagues. These findings remained after adjusting for known confounders.  
13  
14 Reasons for why this sex difference exists needs to be examined.  
15  
16

### 17 18 **Acknowledgements**

19 We acknowledge Una Lane for facilitating access to the data and for answering our  
20 queries on the dataset. We acknowledge Andrew Ledgard for clarifying our queries  
21 on the dataset.  
22  
23  
24  
25  
26  
27  
28  
29  
30  
31  
32  
33  
34  
35  
36  
37  
38  
39  
40  
41  
42  
43  
44  
45  
46  
47  
48  
49  
50  
51  
52  
53  
54  
55  
56  
57  
58  
59  
60

## Footnotes

**Contributorship statement:** EU conceived and designed the study with input from KW and JD. EU and CW categorised the data. EU analysed and interpreted the data with support from KW. EU drafted the manuscript and all authors participated in the revision process and have approved this submission for publication. EU is guarantor, had full access to all of the data in the study, and can take responsibility for the integrity of the data and the accuracy of the data analysis.

**Funding:** No specific funding was obtained for this study. EU is a PhD student, and recipient of a UCL Impact studentship. None of the funders influenced the conduct of this research.

**Competing interests:** All authors have completed the ICMJE uniform disclosure form at [www.icmje.org/coi\\_disclosure.pdf](http://www.icmje.org/coi_disclosure.pdf). All authors declare no competing interests that may be relevant to the submitted work.

**Ethical approval:** The study is part of a research project that has received ethical approval from the UCL Research Ethics Committee.

**Data sharing statement:** No additional data available.

**Transparency declaration:** EU, as guarantor, affirms that this manuscript is an honest, accurate and transparent account of the study being reported; that no important aspects of the study have been omitted; and that any discrepancies from the study as planned have been explained.

**Copyright:** The corresponding author has the right to grant on behalf of all authors and does grant on behalf of all authors, a worldwide licence to the Publishers and its licensees in perpetuity, in all forms, formats and media (whether known now or created in the future), to i) publish, reproduce, distribute, display and store the Contribution, ii) translate the Contribution into other languages, create adaptations, reprints, include within collections and create summaries, extracts and/or, abstracts of the Contribution, iii) create any other derivative work(s) based on the Contribution, iv) to exploit all subsidiary rights in the Contribution, v) the inclusion of electronic links from the Contribution to third party material where-ever it may be located; and, iv) licence any third party to do any or all of the above.



**Table 1:** Distribution of variables by sex of doctors.

| Variable                                           | Male<br>N=196,814 | Female<br>N=132,728 | Total<br>N=329,542 |
|----------------------------------------------------|-------------------|---------------------|--------------------|
| <b>Sanction imposed on registration</b>            |                   |                     |                    |
| No                                                 | 194,633 (98.9%)   | 132,212 (99.6%)     | 326,845 (99.2%)    |
| Yes                                                | 2,181 (1.1%)      | 516 (0.4%)          | 2,697 (0.8%)       |
| <b>No. of years since received PMQ<sup>i</sup></b> |                   |                     |                    |
| 0-2 years                                          | 6,332 (3.2%)      | 8,830 (6.7%)        | 15,162 (4.6%)      |
| 3-10 years                                         | 28,548 (14.5%)    | 37,220 (28.0%)      | 65,768 (20.0%)     |
| 11-20 years                                        | 52,437 (26.6%)    | 40,023 (30.2%)      | 92,460 (28.1%)     |
| 21-30 years                                        | 39,146 (19.9%)    | 23,069 (17.4%)      | 62,215 (18.9%)     |
| 31-40 years                                        | 30,206 (15.4%)    | 12,136 (9.1%)       | 42,342 (12.9%)     |
| ≥41 years                                          | 40,145 (20.4%)    | 11,450 (8.6%)       | 51,595 (15.7%)     |
| <b>Region where received PMQ</b>                   |                   |                     |                    |
| UK                                                 | 108,323 (55.0%)   | 86,989 (65.5%)      | 195,312 (59.3%)    |
| EEA <sup>ii</sup>                                  | 25,333 (12.9%)    | 15,880 (12.0%)      | 41,213 (12.5%)     |
| International                                      | 63,158 (32.1%)    | 29,859 (22.5%)      | 93,017 (28.2%)     |
| <b>Specialty</b>                                   |                   |                     |                    |
| No Specialty                                       | 94,815 (48.2%)    | 73,309 (55.2%)      | 168,124 (51.0%)    |
| Anaesthetics                                       | 8,710 (4.4%)      | 3,797 (2.9%)        | 12,507 (3.8%)      |
| EM <sup>iii</sup>                                  | 754 (0.4%)        | 209 (0.2%)          | 963 (0.3%)         |
| GP <sup>iv</sup>                                   | 37,959 (19.3%)    | 32,264 (24.3%)      | 70,223 (21.3%)     |
| Medicine                                           | 15,076 (7.7%)     | 6,775 (5.1%)        | 21,851 (6.6%)      |
| O&G <sup>v</sup>                                   | 2,934 (1.5%)      | 1,966 (1.5%)        | 4,900 (1.5%)       |
| Ophthalmology                                      | 2,508 (1.3%)      | 1,078 (0.8%)        | 3,586 (1.1%)       |
| Paediatrics                                        | 3,906 (2.0%)      | 3,891 (2.9%)        | 7,797 (2.4%)       |
| Pathology                                          | 5,589 (2.8%)      | 2,965 (2.2%)        | 8,554 (2.6%)       |
| Psychiatry                                         | 5,494 (2.8%)      | 3,077 (2.3%)        | 8,571 (2.6%)       |
| Radiology                                          | 172 (0.1%)        | 41 (0.03%)          | 213 (0.1%)         |
| Surgery                                            | 16,452 (8.4%)     | 1,942 (1.5%)        | 18,394 (5.6%)      |
| Other                                              | 1,330 (0.7%)      | 867 (0.7%)          | 2,197 (0.7%)       |
| Dual Specialty                                     | 1,115 (0.6%)      | 547 (0.4%)          | 1,662 (0.5%)       |

<sup>i</sup>Primary Medical Qualification<sup>ii</sup>European Economic Area<sup>iii</sup>Emergency Medicine<sup>iv</sup>General Practice<sup>v</sup>Obstetrics & Gynaecology

**Table 2:** The distribution of sanctions for each variable and the association of individual factors with sanctions.

| Variable                                           | Total number of doctors | Sanctions (%) | p-value |
|----------------------------------------------------|-------------------------|---------------|---------|
| <b>Sex</b>                                         |                         |               | <0.001  |
| Male                                               | 196,814                 | 1.1%          |         |
| Female                                             | 132,728                 | 0.4%          |         |
| <b>No. of years since received PMQ<sup>i</sup></b> |                         |               | <0.001  |
| 0-2                                                | 15,162                  | 0.1%          |         |
| 3-10                                               | 65,768                  | 0.6%          |         |
| 11-20                                              | 92,460                  | 0.8%          |         |
| 21-30                                              | 62,215                  | 1.1%          |         |
| 31-40                                              | 42,342                  | 1.4%          |         |
| ≥41                                                | 51,595                  | 0.7%          |         |
| <b>Region where received PMQ</b>                   |                         |               | <0.001  |
| UK                                                 | 195,312                 | 0.6%          |         |
| EEA <sup>ii</sup>                                  | 41,213                  | 0.9%          |         |
| International                                      | 93,017                  | 1.2%          |         |
| <b>Specialty</b>                                   |                         |               | <0.001  |
| No Specialty                                       | 168,124                 | 0.7%          |         |
| Anaesthetics                                       | 12,507                  | 0.7%          |         |
| EM <sup>iii</sup>                                  | 963                     | 0.7%          |         |
| GP <sup>iv</sup>                                   | 70,223                  | 1.2%          |         |
| Medicine                                           | 21,851                  | 0.5%          |         |
| O&G <sup>v</sup>                                   | 4,900                   | 1.2%          |         |
| Ophthalmology                                      | 3,586                   | 0.5%          |         |
| Paediatrics                                        | 7,797                   | 0.6%          |         |
| Pathology                                          | 8,554                   | 0.6%          |         |
| Psychiatry                                         | 8,571                   | 0.8%          |         |
| Radiology                                          | 213                     | 0.5%          |         |
| Surgery                                            | 18,394                  | 0.9%          |         |
| Other                                              | 2,197                   | 0.3%          |         |
| Dual Specialty                                     | 1,662                   | 1.4%          |         |

<sup>i</sup>Primary Medical Qualification<sup>ii</sup>European Economic Area<sup>iii</sup>Emergency Medicine<sup>iv</sup>General Practice<sup>v</sup>Obstetrics & Gynaecology

**Table 3:** The adjusted odds ratio for having sanctions against registration for each variable compared to its baseline having adjusted for all other variables.

| Variable                               | Adjusted OR <sup>i</sup> | 95% CI <sup>ii</sup> | p-value |
|----------------------------------------|--------------------------|----------------------|---------|
| <b>Sex of a doctor</b>                 |                          |                      |         |
|                                        |                          |                      | <0.0001 |
| Male                                   | 1                        |                      |         |
| Female                                 | 0.37                     | 0.33-0.41            |         |
| <b>No. of years since received PMQ</b> |                          |                      |         |
|                                        |                          |                      | <0.0001 |
| 0-2                                    | 1                        |                      |         |
| 3-10                                   | 3.42                     | 2.20-5.32            |         |
| 11-20                                  | 3.85                     | 2.48-5.98            |         |
| 21-30                                  | 5.66                     | 3.63-8.81            |         |
| 31-40                                  | 6.44                     | 4.13-10.05           |         |
| ≥41                                    | 3.12                     | 1.20-4.87            |         |
| <b>Region where received PMQ</b>       |                          |                      |         |
|                                        |                          |                      | <0.0001 |
| UK                                     | 1                        |                      |         |
| EEA                                    | 1.33                     | 1.17-1.50            |         |
| International                          | 1.65                     | 1.51-1.80            |         |
| <b>Specialty</b>                       |                          |                      |         |
|                                        |                          |                      | <0.0001 |
| No Specialty                           | 1                        |                      |         |
| Anaesthetics                           | 0.65                     | 0.52-0.82            |         |
| EM                                     | 0.66                     | 0.31-1.39            |         |
| GP                                     | 1.43                     | 1.29-1.58            |         |
| Medicine                               | 0.49                     | 0.40-0.60            |         |
| O&G                                    | 1.22                     | 0.93-1.59            |         |
| Ophthalmology                          | 0.53                     | 0.33-0.83            |         |
| Paediatrics                            | 0.64                     | 0.47-0.88            |         |
| Pathology                              | 0.65                     | 0.50-0.86            |         |
| Psychiatry                             | 0.81                     | 0.63-1.04            |         |
| Radiology                              | 0.47                     | 0.07-3.38            |         |
| Surgery                                | 0.78                     | 0.66-0.93            |         |
| Other                                  | 0.36                     | 0.17-0.77            |         |
| Dual Specialty                         | 1.37                     | 0.90-2.09            |         |

<sup>i</sup> Odds Ratio

<sup>ii</sup> Confidence Interval

**Table 4:** Stratum-specific odds ratios for having sanctions imposed on registration if the doctor is female for each specialty divided into four categories.

| Variable                  | Stratum-Specific OR <sup>i</sup> | 95% CI <sup>ii</sup> | p-value |
|---------------------------|----------------------------------|----------------------|---------|
| <b>Specialty Category</b> |                                  |                      |         |
|                           |                                  |                      | <0.0001 |
| No Specialty              | 0.43                             | 0.38-0.49            |         |
| GP                        | 0.26                             | 0.22-0.31            |         |
| Hospital Specialty        | 0.44                             | 0.36-0.56            |         |
| Dual Specialty            | 0.09                             | 0.13-0.70            |         |

<sup>i</sup> Odds Ratio

<sup>ii</sup> Confidence Interval

## References

1. General Medical Council. *The state of medical education and practice in the UK*. London: GMC; 2012.
2. Dyer C. GMC and vulnerable doctors: too blunt an instrument? *BMJ* 2013; 347: f6230.
3. Elston MA. *Women and medicine: the future*. London: Royal College of Physicians; 2009.
4. Alam A, Klemensberg J, Griesman J et al. The characteristics of physicians disciplined by professional colleges in Canada. *Open Medicine* 2011; 5(4): e173-e174.
5. Cardarelli R & Licciardone, JC. Factors associated with high-severity disciplinary action by a state medical board: a Texas study of medical license revocation. *JAOA* 2006; 106(3): 153-156.
6. Clay SW & Conaster RR. Characteristics of physicians disciplined by the State Medical Board of Ohio. *JAOA* 2003; 103(2): 81-88.
7. Khaliq AA, Dimassi H, Huang CY, et al. Disciplinary action against physicians: who is likely to get disciplined? *The American Journal of Medicine* 2005; 118(7): 773-777.
8. Kohatsu ND, Gould D, Ross LK et al. Characteristics associated with physician discipline: a case-control study. *Archives of Internal Medicine* 2004; 164(6): 653-658.
9. Morrison J & Wickersham P. Physicians disciplined by a State Medical Board. *JAMA* 1998; 279: 1889-1893.
10. Elkin KJ, Spittal MJ, Elkin DJ et al. Doctors disciplined for professional misconduct in Australia and New Zealand, 2000-2009. *MJA* 2011; 194: 452-456.
11. Wakeford R. Who gets struck off? *BMJ* 2011; 343: d7842.
12. General Medical Council. *A guide for doctors referred to the GMC*. [http://www.gmc-uk.org/concerns/doctors\\_under\\_investigation/a\\_guide\\_for\\_referred\\_doctors.asp](http://www.gmc-uk.org/concerns/doctors_under_investigation/a_guide_for_referred_doctors.asp) (accessed December 2013)
13. Humphrey C, Hickman S & Gulliford MC. Place of medical qualification and outcomes of UK General Medical Council "fitness to practise" process: cohort study. *BMJ* 2011; 342: d1817.
14. European Union. *Countries*. [http://europa.eu/about-eu/countries/index\\_en.htm](http://europa.eu/about-eu/countries/index_en.htm) (accessed May 2013).
15. Von Elm E, Altman DG, Egger M, et al. The Strengthening the Reporting of Observational Studies in Epidemiology (STROBE) Statement: Guidelines for Reporting Observational Studies. *PLoS Med* 2007; 4(10): e296.
16. General Medical Council. *The state of medical education and practice in the UK*. London: GMC; 2013.
17. General Medical Council. *Guidance on making decisions on voluntary erasure applications*. GMC; 2013.
18. Lambert TW, Goldacre MJ & Parkhouse J. Doctors who qualified in the UK between 1974 and 1993: age, gender, nationality, marital status and family formation. *Medical Education* 1998; 32(5): 533-537.
19. Lambert TW, Goldacre MJ, Edwards C, et al. Career preferences of doctors who qualified in the United Kingdom in 1993 compared with those doctors qualifying in 1974, 1977, 1980, and 1983. *BMJ* 1996; 313(7048): 19-24.
20. Taragin TI, Wilczek AP, Karns ME, et al. Physician demographics and the risk of medical malpractice. *The American Journal of Medicine* 1992; 93(5): 537-542.
21. Firth-Cozens, J. Doctors with difficulties: why so few women? *Postgraduate Medical Journal* 2008; 84(992): 318-320.
22. Roter D, Lipkin M & Korsgaard A. Sex differences in patients' and physicians' communication during primary care medical visits. *Medical Care* 1991; 29(11): 1083-1093.
23. Bloor K, Freemantle N & Maynard A. Gender and variation in activity rates of hospital consultants. *J R Soc Med* 2008; 101(1): 27-33.
24. Goldacre MJ, Lambert TW & Davidson JM. Loss of British-trained doctors from the medical workforce in Great Britain. *Med Educ* 2001; 35(4): 337-344.

## Title Page

### Disciplined doctors: does the sex of a doctor matter?

A cross-sectional study examining the association between a doctor's sex and receiving sanctions against their medical registration.

Formatted: Font: 12 pt

Emily Unwin, Katherine Woolf, Clare Wadlow, Jane Dacre

#### Corresponding author:

Prof Jane Dacre, Director UCL Medical School  
UCL Medical School, 74 Huntley Street. London, WC1E 6AU. UK  
j.dacre@ucl.ac.uk  
Tel: 020 7679 0894  
Fax: 020 7679 0890

Dr Emily Unwin, PhD student  
UCL Medical School, Royal Free Hospital, London, NW3 2PF. UK

Dr Katherine Woolf, Lecturer  
UCL Medical School, Royal Free Hospital, London, NW3 2PF. UK

Dr Clare Wadlow, Clinical training fellow  
UCL Medical School, Royal Free Hospital, London, NW3 2PF. UK

#### Key words:

Law, Medical education & training, epidemiology, GMC, gender

#### Word count:

4432

## Abstract

**Objectives:** To examine the association between doctors' sex and receiving sanctions on their medical registration, whilst controlling for other potentially confounding variables.

**Design:** Cross-sectional study.

**Setting:** The General Medical Council's (GMC) List of Registered Medical Practitioners (LRMP) database of doctors practising in the United Kingdom (UK).

**Population:** All doctors on the GMC's LRMP on 29<sup>th</sup> May 2013. The database included all doctors who are or have been registered to practice medicine in the UK since October 2005. The exposure of interest was doctor's sex. Confounding variables included years since primary medical qualification, world region of primary medical qualification and specialty.

**Outcome measures:** Sanctions on a doctor's medical registration. Sanction types included warning, undertakings, conditions, suspension or erasure from the register. Binary logistic regression modelling, controlling for the confounders, described the association between doctor's sex and sanctions on a doctor's medical registration.

**Results:** Of the 329,542 doctors on the LRMP, 2,697 doctors (0.8%) had sanctions against their registration, 516 (19.1%) of whom were female. In the fully adjusted model, female doctors had nearly a third of the odds (OR 0.37, 95% CI: 0.33-0.41) of having sanctions compared to male doctors. There was evidence that the association varies with specialty, with female doctors who had specialised as [General Practitioners \(GPs\)](#) being the least likely to receive sanctions compared to their male colleagues ([OR 0.26, 95% CI: 0.22-0.31](#)).

**Conclusions:** Female doctors have reduced odds of receiving sanctions on their medical registration when compared to their male colleagues. This association remained after adjustment for the confounding factors. These results are representative of all doctors registered to practice in the UK. Further exploration of why doctors' sex may impact their professional performance is underway.

## Article summary

### Strengths and limitations of this study

- We used a large national database with no missing data, so the findings of the study apply to all doctors registered to practise in the UK.
- Receiving sanctions is a rare outcome and using a large dataset is crucial when examining rare outcomes.
- This is one of the first studies of this nature on UK data that adjusted for known confounders.
- The study was constrained by the variables collected and made available by the GMC. So we were unable to examine the effect of other potential confounding factors.
- The data available did not provide the reasons for why a sanction had been imposed, nor data on those granted voluntary erasure. A more detailed evaluation of the reasons for referral to the GMC may go towards explaining the sex difference observed.

## Introduction

The number of complaints about doctors' fitness to practise received by the UK medical regulatory body, the General Medical Council (GMC), has been increasing since 2007<sup>1</sup>. Following a triage and investigation process by the GMC the outcome of a case against a doctor can be closed, or can result in a sanction against the doctor's registration. The cost of this regulatory process, both in terms of financial cost of the actual complaints investigation procedure, but also in terms of the loss of the medical workforce during the process, can be significant. The level of stress that a doctor endures while undergoing a fitness to practise investigation was recently reported in the BMJ and highlights the impact the complaints investigation procedure can have on the mental well being of doctors<sup>2</sup>.

One of the most significant changes in the medical profession has been the increase in the number of women entering this previously male dominated profession. The number of female medical students has been increasing since the mid-1960s with female medical students outnumbering male medical students since the mid-1990s<sup>3</sup>. It is predicted that female doctors will outnumber their male colleagues by 2017<sup>3</sup>. This change in the demographic profile of UK doctors has brought with it a heightened interest in how the increase of female doctors may impact the profession.

Examining and understanding the predictors of doctors receiving sanctions may aid the medical profession in identifying doctors whose performance might raise future concerns, in order to support these doctors and help prevent GMC referral. Research from [Canada](#), the United States of America [and Australia and New Zealand](#) has suggested that male and female doctors differ in terms of risk of disciplinary action, with male doctors being at increased risk<sup>4,5,6,7,8,9,10</sup>. However, the applicability of the findings from these ~~American~~ studies to the UK may be limited due to differences in both the medical and legal systems in these countries. In 2011 Wakeford explored the situation in the UK<sup>11</sup>. He examined the factors associated with severest outcomes of the GMC disciplinary procedures, suspension or erasure from the medical register. In agreement with the ~~se worldwide-American~~ studies, he demonstrated that female doctors were four times less likely to be disciplined when compared to male doctors. However, the interpretation of this finding is limited because the measure of effect for doctors' sex was not adjusted for potential confounders.



1  
2  
3  
4  
5  
6 We aimed to examine the effect of doctors' sex on receiving sanctions against their  
7 medical registration, while adjusting for known confounding factors. This would allow  
8 for a meaningful comparison of male and female doctors and their experience of  
9 disciplinary action in the UK.  
10

## 11 12 13 **Methods**

### 14 **Study design, setting and source of data**

15 We conducted a cross-sectional study using UK-wide data. The data [and permission](#)  
16 [to use the data for research purposes](#) were obtained from the GMC. [This study is](#)  
17 [part of a research project that has received ethical approval from the UCL Research](#)  
18 [Ethics Committee.](#)  
19

20 Under the Medical Act 1983 the GMC is required to keep up-to-date registers of  
21 qualified doctors. The main register is the List of Registered Medical Practitioners  
22 (LRMP). The LRMP is a list of all doctors registered to practise medicine in the UK,  
23 and as such changes daily. [It lists those doctors who are \(or could\) practise](#)  
24 [medicine, as well as those doctors who have been suspended or erased.](#) The GMC  
25 provided us with a snapshot of doctors registered on the LRMP on the 29<sup>th</sup> May  
26 2013. The list included [all](#) doctors who have been registered with the GMC [\(and](#)  
27 [therefore eligible to actively practise medicine\)](#) at any point in the period 20<sup>th</sup> October  
28 2005<sup>a</sup> – 28<sup>th</sup> May 2013. The different categories of registration status included:  
29 provisionally [or fully](#) registered ~~with a licence; provisionally registered without a~~  
30 ~~licence; registered with a licence; registered without a licence;~~ suspended; not  
31 registered – administrative reason, ~~or ; not registered~~ – deceased, ~~or having~~  
32 ~~relinquished registration;~~ [and](#) not registered – erased after Fitness to Practise panel  
33 hearing; ~~and not registered~~ ~~having relinquished registration.~~ The database  
34 provided details of doctor's sex; the year, country, and institutions of the doctor's  
35 primary medical qualification [and the doctor's current registration status, including](#)  
36 [whether they currently had any sanctions on their medical registration \(see below for](#)  
37 [details\).](#) It classified doctors as General Practitioners (GPs) (on the GP register) and  
38 [as hospital specialists \(on the Specialist register\).](#) Doctors who are neither on the  
39 GP or Specialist registers are doctors who have not undertaken or completed  
40 speciality training; ~~date of entry on the GP and/or Specialist registers (when they~~  
41 ~~complete speciality training and qualify as a specialist); and the doctor's current~~  
42 ~~registration status, including whether they currently had any sanctions on their~~  
43 ~~medical registration (see below for details).~~  
44  
45  
46  
47  
48  
49  
50  
51  
52  
53

54 <sup>a</sup> The 20<sup>th</sup> October 2005 was the date when the GMC first began to publish full details of a doctor's  
55 registration status on the LRMP online.  
56  
57  
58  
59  
60

## Population

All doctors who were listed on the LRMP on the 29<sup>th</sup> May 2013 were included.

## Primary outcome and exposure

The outcome of interest was sanctions on a doctor's medical registration on the 29<sup>th</sup> May 2013.

The types of sanctions included:

- **Warning:** issued when a doctor's performance has not been in keeping with the principles set by the GMC for doctors, but a restriction on the doctor's registration is not necessary. Warnings remain on the LRMP for a five year period;
- **Undertakings:** an agreement between the GMC and the doctor about the doctor's future practice. The doctor must adhere to these undertakings to maintain their registration;
- **Conditions:** set out by the GMC and restrict a doctor's practice. The doctor must comply with these conditions to maintain their registration. Conditions can initially be imposed for a maximum of three years and then be renewed in periods of up to 36 months;
- **Suspension or erasure:** the doctor's licence is withdrawn by the GMC and they are no longer able to practise. Suspension from the register can last up to 12 months, but may be indefinite in certain circumstances.

A sanction can be imposed if a doctor's fitness to practise has been proved to be impaired. The impairment can result from misconduct; poor professional performance; physical or mental ill health; or a conviction or fitness to practise determination by another regulatory body either in the UK or overseas<sup>12</sup>. However it is recognised that the reason for impairment can cross more than one category (for example a doctor with a drug misuse problem could be classified as having mental ill health, yet the effects of the drug abuse could impact their professional performance). The duration of a sanction on a doctor's registration varies and it is possible for doctors to have more than one sanction against their registration and this typically represents the outcomes of different complaints. It was not possible to establish the date a sanction was imposed or the reason for why a sanction had been imposed from the available data.

1  
2  
3  
4  
5  
6 The outcome of interest was collapsed into a binary variable: doctors with sanctions  
7 against their registration; and doctors with no sanctions against their registration.  
8  
9

10 The exposure of interest was doctor's sex, as declared by the doctor to the GMC.  
11

### 12 **Selection of variables**

13  
14 The variables included in the study were selected before any statistical analysis.  
15 Data was available on the year of primary medical qualification (PMQ), country of  
16 PMQ and primary specialty, if on the Specialist or General Practitioner (GP)  
17 Registers. These variables were selected as a priori confounders based on findings  
18 from earlier research<sup>7,8,11,13</sup>, which demonstrated that these factors may influence the  
19 risk of receiving sanctions.  
20  
21

22 Once the variables had been selected, we performed a variable reduction process, to  
23 reduce the number categories into meaningful categories. Once again, this was  
24 performed before any statistical analysis. The variable 'year of PMQ' was converted  
25 into 'number of years since qualification' by subtracting the year of PMQ from 2013  
26<sup>b</sup>. We then collapsed the variable into six categories. The first category '0-2 years'  
27 represented Foundation Training, the second category '3-10 years' represented the  
28 bulk of time a doctor would likely spend in Specialty Training. The subsequent  
29 categories were divided into 10-year blocks. The variable 'country of PMQ' was  
30 collapsed into three categories; 'UK', 'EEA' (European Economic Area) and  
31 'International'. The list of countries included in the EEA category was obtained from  
32 the European Union website<sup>14</sup> and included all countries that were members before  
33 May 2013. The variable 'specialty' was divided into fourteen categories. Doctors  
34 who were not present on either the Specialist Register or the GP Register were  
35 categorised as having 'no specialty' **and represented trainee and other non-specialist**  
36 **doctors**. Doctors on both the Specialist Register and the GP Register were recorded  
37 as having 'dual specialty' and doctors only on the GP register were categorised as  
38 'GP'. For doctors only registered on the Specialist Register, their primary specialty  
39 was taken and recorded into one of eleven categories. To categorise those doctors  
40 on the Specialist Register two researchers (EU and CW) independently allocated  
41 each primary specialty to a specialty category. Kappa statistic demonstrated a good  
42 level of agreement (kappa = 0.72). Any disagreements about specialty category  
43 allocation were resolved through discussion.  
44  
45  
46  
47  
48  
49  
50  
51

52  
53 <sup>b</sup> As mentioned above, a doctor could appear in the LRMP dataset if they had been removed from the  
54 medical register. The actual date of those doctors being removed could lie anytime between 20<sup>th</sup>  
55 October 2005 and 28<sup>th</sup> May 2013. However, as no actual removal dates were given for those doctors,  
56 we used 2013 for all doctors.  
57  
58  
59  
60

## Statistical methods

We took a causal modelling analysis approach to analyse the data. We firstly performed bivariate analyses to look for crude associations in the data, followed by Mantel-Haenszel analyses, before going on to complete multivariate analyses using binary logistic regression modelling. The initial logistic regression model included only the exposure (sex) and outcome (sanctions) variables to provide a crude measure of effect. The final logistic regression model was built to include all potential confounder variables, while checking for multicollinearity. The final logistic regression model enabled the calculation of an adjusted measure of effect. The final model was assessed for the presence of effect modifiers following the findings from the Mantel-Haenszel analyses.

Statistical analyses were conducted using the software Stata 12/SE.

We used the STROBE Statement<sup>15</sup> to guide our study report.

## Results

There were 329,542 doctors on the LRMP on the 29<sup>th</sup> May 2013, of whom 40.3% were female. Table 1 shows the distribution of variables by the sex of doctors. The median number of years since qualification was 19 years. The distribution of the number of years since a doctor had qualified was skewed to the right with the majority of the doctors qualifying 11-20 years ago (28.1%). The majority of the doctors had received their PMQ from a UK medical school (59.3%).

Approximately half of all the doctors were neither on the GP Register nor the Specialist Register (51.0%), of which the majority (58.0%) had received their PMQ greater than 10 years previously. It is interesting to note that half of the doctors registered to practise medicine in the UK in this period were not registered specialists (they were neither on the GP or Specialist registers) and the majority of these doctors had qualified greater than ten years ago, suggesting that these doctors are not trainee doctors, but doctors who have elected not to complete specialty training.

Of those doctors who had specialised, General Practice was the most popular specialty (21.3%), followed by Medicine (6.6%). 0.5% of the doctors were on both the Specialist and GP Registers.

2697 (0.8%) doctors had sanctions against their registration on the 29<sup>th</sup> May 2013. There was a higher proportion of male doctors who had sanctions against their

1  
2  
3  
4  
5  
6 registration when compared to female doctors (1.1% of all male doctors compared  
7 with 0.4% of all female doctors,  $\chi^2=505.4$ ,  $P<0.001$ ). There was strong evidence for  
8 an association between receiving sanctions and the number of years since received  
9 PMQ, with doctors who qualified 31-40 years ago having the highest proportion of  
10 sanctions; world region of PMQ, with doctors who qualified outside the EEA with the  
11 highest proportion of doctors with sanctions; and specialty, with doctors on both the  
12 Specialist and GP Registers having the highest proportion of doctors with sanctions.  
13 These results are presented in Table 2.  
14  
15  
16

17  
18 Using bivariate analyses we compared female doctors to male doctors. There was a  
19 strong trend between sex of a doctor and the number of years since the doctor  
20 received their PMQ, with female doctors being more likely to have recently qualified  
21 and the proportion of female doctors reducing as the number of years since PMQ  
22 increased. We also found that female doctors were more likely to have qualified in  
23 the UK (65.5% of all female doctors compared to 55.0% of all male doctors) and  
24 male doctors were more likely to have qualified outside of the EEA (32.1% of all male  
25 doctors compared to 22.5% of all female doctors). Approximately equal proportions  
26 of male and female doctors qualified in the EEA (12.9% and 12.0% respectively).  
27 Both sexes were more likely to be not registered in a specialty (GP or hospital),  
28 though there was a slightly higher proportion of women when compared to men who  
29 were not on the Specialist or GP Registers. When examining those doctors who  
30 were registered in a specialty, a higher proportion of female doctors were on the GP  
31 Register compared to male doctors (24.3% of female doctors compared with 19.3%  
32 of male doctors) and a higher proportion of male doctors were registered with a  
33 hospital specialty (32.0% of male doctors compared with 20.1% of female doctors).  
34 In summary, number of years since received PMQ, world region where PMQ was  
35 received, and registered specialty were associated with both the outcome (sanctions)  
36 and the exposure (sex of a doctor) and as such we considered these variables as  
37 confounders.  
38  
39  
40  
41  
42  
43  
44  
45

46 The unadjusted odds ratio for having sanctions against a doctor's registration  
47 comparing female doctors with male doctors was 0.35 (95% CI: 0.32-0.38),  
48 suggesting that being a female doctor is protective of receiving sanctions.  
49

50 Mantel-Haenszel analyses and tests of homogeneity were conducted to examine the  
51 change in the strength of the association between sanctions and sex while controlling  
52 for each of the confounders separately.  
53  
54  
55  
56  
57  
58  
59  
60

1  
2  
3  
4  
5  
6 There was strong evidence that the true odds ratios were different between the  
7 different specialty categories ( $P=0.0002$ ), therefore specialty was considered as an  
8 effect modifier when conducting multivariate analyses.  
9

10  
11 Table 3 represents the results from the binary logistic regression model built to adjust  
12 for all the variables. After taking into account the number of years since PMQ, world  
13 region where the doctor received their PMQ and specialty, female doctors had nearly  
14 a third of the odds of having sanctions on their registration compared to male doctors  
15 (OR 0.37, 95% CI: 0.33-0.41,  $P<0.0001$ ).  
16

17  
18 All of the a priori confounders were felt to be confounders because the adjusted odds  
19 ratio changed when each variable was added to the model. We found no evidence  
20 of multicollinearity.  
21

22 The Mantel-Haenszel analyses suggested that specialty may be an effect modifier,  
23 we therefore performed a statistical test for effect modification by firstly collapsing the  
24 specialty variable into four groups to increase the power of the test. Table 4  
25 demonstrates that specialty was felt to be an important effect modifier with female  
26 doctors being less likely to receive sanctions when compared to male doctors, but  
27 the effect was greater for GPs than for those doctors with no specialty or practising a  
28 hospital specialty.  
29  
30  
31

32  
33 ~~Upon discovering the strong evidence for an association between doctor's sex and~~  
34 ~~likelihood of receiving sanctions on a doctor's registration, we decided to further the~~  
35 ~~findings by performing post-hoc analyses to establish whether the type of sanction~~  
36 ~~imposed on a doctor's registration was associated with doctor's sex. All variables~~  
37 ~~were categorised to create binary variables to ensure there were sufficient cases in~~  
38 ~~each category of variable. The results displayed in Table 5 demonstrate that female~~  
39 ~~doctors have reduced odds of having each type of sanction imposed on their~~  
40 ~~registration when compared to their male colleagues. Female doctors had~~  
41 ~~approximately one third of the odds of receiving a warning, being suspended or~~  
42 ~~erased from the register and they had just over half the odds of receiving~~  
43 ~~undertakings or conditions on their registration compared to male doctors. The~~  
44 ~~Mantel-Haenszel analyses suggested that when examining the outcome 'warning'~~  
45 ~~specialty may be an effect modifier, and when examining the outcome 'erased' world~~  
46 ~~region where received PMQ may be an effect modifier, we therefore performed a~~  
47 ~~statistical test for effect modification. Specialty was demonstrated to be an important~~  
48 ~~effect modifier when examining the association between warning and sex, with~~  
49 ~~female specialists having approximately half the odds of receiving a warning~~  
50  
51  
52  
53  
54  
55  
56  
57  
58  
59  
60

~~compared to male specialists, whereas for male and female doctors without a specialty there was no strong evidence for a difference in the odds of receiving a warning (see Table 6). World region where a doctor received their PMQ was also shown to be an important effect modifier when examining the association between erasure and sex. Female doctors who had received their PMQ in the UK had approximately one fifth of the odds of being erased, whereas female doctors who received their PMQ outside of the UK had approximately one third of the odds of being erased when compared to their male colleagues (see Table 7).~~

## Discussion

In our large cross-sectional study we found strong evidence that being female was associated with a reduction in odds of receiving sanctions (OR 0.35, 95% CI: 0.32-0.38) in the unadjusted model. Controlling for years since PMQ, world region where received PMQ, and specialty did slightly increase this odds ratio (OR 0.37, 95% CI: 0.33-0.41,  $P < 0.0001$ ), but there remained strong evidence for the association between doctor's sex and receiving sanctions. There was evidence that the association varied with specialty, with female GPs being the least likely to have sanctions against their registration. ~~Post hoc analyses demonstrated the association between receiving a warning varied with specialty registration, with female specialists having less than half the odds of receiving a warning when compared to their male colleagues, but no real evidence for a difference between the sexes and receiving a warning in doctors who had not yet specialised. Post hoc analyses also provided evidence to show that the odds of being erased from the medical register varied depending on where a doctor had received their PMQ, with female doctors who had received their PMQ in the UK being the least likely to be erased from the medical register.~~

To our knowledge this is the first study in the UK to examine the association between doctor's sex and receiving sanctions against medical registration, while adjusting for known confounders. We believe that these known confounders have only been adjusted for in one other study which was conducted in the USA<sup>8</sup>.

## Strengths and weaknesses of this study

One of the major strengths of this study is that we used a large national database. The advantage of using this dataset is two-fold; firstly, because a national database was used the findings of the study apply to all doctors registered to practise in the

1  
2  
3  
4  
5  
6 UK; secondly, receiving sanctions is a rare outcome and using a large dataset is  
7 crucial when examining rare outcomes.

8  
9 A further strength of this study is that it adjusted for known confounders, all these  
10 confounders have only been adjusted for in one previous study, which was  
11 conducted in California<sup>8</sup>. Previous research on UK data did not adjust the measure  
12 of effect of sex for potential confounders<sup>11</sup>.

13  
14 Finally, a further advantage was the completeness of the dataset. The data is  
15 collected by the GMC for inclusion on the LRMP, and not research purposes.  
16 Doctors are required to provide the data to the GMC to be registered and as such  
17 there is no missing data. However, the fact the data is not collected for research  
18 purposes is also a limitation of the study. The study was constrained by the  
19 variables collected and made available by the GMC. As such, we were only able to  
20 explore the variables available and we were unable to examine the effect of other  
21 potential confounding factors or explore the reasons for why a sanction had been  
22 imposed.

23  
24 It could be argued that the reason for referral to the GMC could be a source of  
25 residual confounding if systematic differences exist between the sexes. The GMC  
26 may take action against a doctor's registration for a number of reasons, which can be  
27 broadly divided into three major categories; including misconduct; poor professional  
28 performance; or physical or mental ill health. The data available did not provide the  
29 reasons or the category for why a sanction had been imposed, but a more detailed  
30 evaluation of the reasons for referral to the GMC may go towards explaining the sex  
31 difference observed. In their research, Alam et al.<sup>4</sup> and Elkin et al.<sup>10</sup>, demonstrated  
32 not only that male doctors were more likely to be subject to disciplinary action, but  
33 that the main offense for which a doctor was being disciplined was sexual  
34 misconduct. It is possible that male doctors are more likely to commit an offense  
35 involving sexual misconduct than their female colleagues, which may go towards  
36 explaining the sex difference seen in these populations. However, other studies in  
37 this area did not find sexual misconduct to be the most common offense<sup>6,7,9</sup>. As  
38 such, exploring the offenses for which a doctor may receive disciplinary action in this  
39 population may go towards explaining the sex difference observed and may help the  
40 regulatory body and medical profession to introduce targeted interventions, such as  
41 education programmes, to reduce the number of offenses.

42  
43 A further source of residual confounding could be the route of referral. Doctors  
44 practising in the UK can be referred to the GMC through five main routes: the public;  
45 employers; doctors; the GMC; and the police<sup>16</sup>. It would be interesting to examine  
46  
47  
48  
49  
50  
51  
52  
53  
54  
55  
56  
57  
58  
59  
60



whether the referral rate for each route demonstrates any sex differences, and if so, exploring the reasons for this difference.

A further limitation is that a doctor can apply for voluntary erasure from the LRMP during an investigation process. Once again, this is a potential source of residual confounding and it is possible that the sex of doctors who are subject to a complaints investigation and apply for voluntary erasure differs to those doctors who complete the investigative process and receive a sanction (however, ~~it is important to note that~~ the GMC's decision to grant a request for voluntary erasure is based on the public interest and the doctor's health and likelihood to return to practise<sup>174</sup>). It is important to note that voluntary erasure is requested by doctors for multiple reasons other than being involved in an investigation process, including retiring permanently from practising medicine or leaving the UK to work permanently abroad. To explore whether voluntary erasure requests may explain the sex difference seen, the reason for why a voluntary erasure request was submitted would first have to be ascertained. This information was not available in the dataset used for this research, but could be requested and explored in future studies.

It is also of interest to note that certain sanctions (erasure and some suspensions) are permanent, whereas other sanctions are time limited. As such, the permanent sanctions may be over represented because they will never be removed from a doctor's registration. If male doctors are more likely to receive these permanent sanctions, this could lead to male doctors being over represented when examining the association between sex and sanctions, and may go towards explaining the sex difference observed between doctors who had sanctions imposed against their registration.

### **Comparison with other studies**

Our main finding, that female doctors are less likely to be subject to disciplinary action when compared to their male colleagues, mirrors the results of several studies from across the world which have also examined the association between doctors' sex and disciplinary action.~~Several studies have examined the association between doctors' sex and disciplinary action, with the majority of these studies demonstrating that female doctors are less likely to be subject to disciplinary action than male doctors~~<sup>4,4,6,7,8,9,10,11,5,6,7,8,9</sup>. However, the majority of these studies have been performed in the United States of America<sup>6,7,8,9</sup>, Canada<sup>4</sup>, Australia and New Zealand<sup>10</sup>, where the medical and legal systems differ to the UK and therefore we felt that their findings may not be applicable to the UK population of doctors. These

1  
2  
3  
4  
5  
6 studies' main objective was not necessarily to explore the association between  
7 doctors' sex and disciplinary action. Some of these studies were descriptive and  
8 those studies that did control for confounders did not, albeit for one study<sup>8</sup>, control for  
9 the same confounders we have selected. To our knowledge, one study has been  
10 performed in the UK using national data<sup>11</sup>, however when examining the association  
11 between doctors' sex and disciplinary action this study did not control for any  
12 potential confounders.

13  
14  
15 The findings of this study are in agreement with previous research that has shown  
16 that older doctors<sup>8</sup>, doctors who qualified outside of the country in which they are  
17 practising<sup>11,13</sup> and doctors of certain specialties<sup>7</sup> are more likely to be subjected to  
18 disciplinary action from a medical regulatory board. It has also been demonstrated in  
19 previous studies that female doctors are more likely to have qualified more  
20 recently than male doctors<sup>3</sup>, are more likely to have qualified in the country in which  
21 they are practising<sup>18</sup> and choose different specialties to male doctors<sup>19</sup>.

22  
23  
24 This study showed that the reason that male doctors receive more sanctions is not  
25 because they qualified longer ago, nor because they are more likely to have qualified  
26 outside the UK, despite both of those factors being associated with increased  
27 likelihood of sanctions.  
28  
29

### 30 31 32 **Unanswered questions and future research**

33 This study has demonstrated that female doctors are less likely to receive sanctions  
34 against their medical registration compared to male doctors, however it is not clear  
35 why women are less likely to receive sanctions when compared to men. Exploring  
36 the possible reasons for this sex difference in professional performance is required,  
37 using a theoretical based approach. One theory suggested by some researchers is  
38 that male and female doctors differ in communication style and hence the interaction  
39 with patients and colleagues differed between the sexes, which could affect the risk  
40 of being subject to a complaint<sup>20,21</sup>. Future research could be performed to explore  
41 this further and examine whether communication styles differ between male and  
42 female doctors, and also whether the communication styles of doctors who receive  
43 sanctions differ from doctors who have never received sanctions.  
44  
45  
46  
47  
48

49 We have also demonstrated that the effect of sex on likelihood to receive sanctions  
50 varied by specialty, with female GPs being the least likely to receive sanctions. It  
51 has been demonstrated by an observational study of primary care physicians in the  
52 USA that female primary care physicians spend more time with their patients when  
53 compared to their male colleagues and they engaged more in conversation,  
54  
55  
56  
57  
58  
59  
60

1  
2  
3  
4  
5  
6 displaying more positive-talk, partnership-building, question-asking and information-  
7 giving<sup>22</sup>. These differences in communication style and time spent with patients may  
8 go towards explaining the larger sex discrepancy observed in GPs, however future  
9 research is required to explore these possible reasons further.  
10

11  
12  
13 Our results show that doctors who had been qualified for longer were more likely to  
14 receive sanctions, it is therefore reasonable to hypothesise that the risk of receiving a  
15 sanction increases with exposure. Therefore doctors who work part-time or have  
16 fewer patient encounters may be less likely to receive sanctions against their  
17 registration. Previous studies have demonstrated that female consultants have fewer  
18 patient episodes and are more likely to work part-time when compared to their male  
19 colleagues<sup>23,24</sup>, it is therefore reasonable to hypothesise that the sex difference  
20 observed in disciplinary action may be partly explained by the difference in work  
21 patterns between the sexes. This hypothesis merits being explored further by  
22 examining whether those doctors who receive sanctions are more likely to work full-  
23 time and have more patient encounters than those doctors who have never received  
24 sanctions.  
25  
26  
27  
28  
29

30  
31 A further possible explanation for the sex difference observed is perhaps that male  
32 and female doctors are viewed and treated differently by the public, the profession  
33 and the regulatory body. It is possible that there is a higher threshold of tolerance for  
34 female doctors. The GMC are twice as likely to receive a complaint about a male  
35 doctor than a female doctor<sup>16</sup>. It is reasonable to assume that as a result male  
36 doctors are more likely to receive sanctions against their medical registration.  
37 Research examining the perception of male and female doctors would be  
38 warranted.~~We have also shown that female specialists are much less likely than~~  
39 ~~male specialists to receive a warning, but the sex difference disappears for doctors~~  
40 ~~who have not yet specialised. The association between sex and the other types of~~  
41 ~~sanctions was not found to vary with specialty registration. Examining why receiving~~  
42 ~~warnings varies according to specialty registration, with a sex difference being~~  
43 ~~observed in specialists, merits being explored. Possibilities include that the threshold~~  
44 ~~for delivering a warning to a non-specialist is lower than for a specialist because it~~  
45 ~~may be more likely that a non-specialist is at an early stage of their career and~~  
46 ~~perhaps the medical regulatory body feel it is important to highlight that behaviour~~  
47 ~~which demonstrates a significant departure from the principles of Good Medical~~  
48 ~~Practice as set out by the GMC will be dealt with seriously and the warning may be~~  
49  
50  
51  
52  
53  
54  
55  
56  
57  
58  
59  
60

1  
2  
3  
4  
5  
6 hoped to act as a deterrent for any future more serious demonstrations of departure  
7 from the principles set out by the GMC.  
8

9  
10 Our results have demonstrated that female doctors who qualified in the UK are the  
11 least likely to be erased from the medical register (the most severe sanction to be  
12 imposed). Female doctors who qualified outside of the UK are less likely to be  
13 erased from the medical register than their male colleagues who qualified outside of  
14 the UK, but they are more likely to be erased than their female colleagues who  
15 qualified in the UK. These results echo the findings of a cohort study conducted by  
16 Humphrey et al.<sup>11</sup> who demonstrated that referrals to the GMC concerning doctors  
17 who had received their PMQ outside of the UK was associated with the most severe  
18 sanctions on their registration (suspension or erasure).  
19

20  
21 Our results also show that female doctors have approximately one third of the odds  
22 of being erased or suspended, and just over half the odds of receiving undertakings  
23 or conditions when compared to their male colleagues. These results suggest that,  
24 with the exception of the sanction 'warning', the more severe the sanction  
25 (suspension or erasure from the medical register) the more likely men will receive it.  
26 Exploring the reasons for this sex difference in the severity of sanctions imposed  
27 would be of interest. It is possible that male doctors' behaviour and actions warrant  
28 the severest types of sanctions to be imposed, whereas female doctors' behaviour  
29 and actions do not require such severe sanctions. Examining the reasons for why  
30 doctors have received sanctions would go towards showing whether this is in fact the  
31 case.  
32  
33

34  
35 It should also be noted that this study was observational in design and as such  
36 causality cannot be determined. It is possible that other factors, such as ethnicity,  
37 may be confounding the association between doctors' sex and disciplinary action.  
38 Research examining whether other potential confounders could explain the observed  
39 association is required  
40

41  
42 The points discussed above highlight that the real interest of this research is not  
43 about the outcome sanctions itself, but about trying to understand the differences  
44 between male and female doctors that lead to the observed sex difference in  
45 receiving sanctions. Investigations into why and how male and female medical  
46 practises differ will in turn lead to being able to propose interventions to reduce not  
47  
48  
49  
50  
51  
52  
53  
54  
55  
56  
57  
58  
59  
60

1  
2  
3  
4  
5  
6 only the number of doctors referred to the medical regulatory body, but also the  
7 difference between the sexes of doctors who are referred. Further exploration of why  
8 doctors' sex may impact their professional performance is needed to enable the  
9 profession to develop a better understanding of the factors associated with impaired  
10 fitness to practise and crucially, how to better support those doctors and ensure  
11 patient safety.

12 ~~It should also be noted that this study was observational in design and as such~~  
13 ~~causality cannot be determined. It is possible that other factors, such as ethnicity,~~  
14 ~~may be confounding the association between doctors' sex and disciplinary action.~~  
15 ~~Research examining whether other potential confounders could explain the observed~~  
16 ~~association is require~~

17 ~~Further exploration of why doctors' sex may impact their professional performance is~~  
18 ~~needed to enable the profession to develop a better understanding of the factors~~  
19 ~~associated with impaired fitness to practise and crucially, how to better support those~~  
20 ~~doctors and ensure patient safe~~

## 21 **Conclusion**

22  
23  
24  
25  
26  
27  
28 In this study we demonstrated that female doctors practising in the UK were less  
29 likely to receive sanctions on their medical registration when compared with their  
30 male colleagues. These findings remained after adjusting for known confounders.  
31 Reasons for why this sex difference exists needs to be examined.

## 32 **Acknowledgements**

33  
34  
35  
36 We acknowledge Una Lane for facilitating access to the data and for answering our  
37 queries on the dataset. We acknowledge Andrew Ledgard for clarifying our queries  
38 on the dataset.  
39  
40  
41  
42  
43  
44  
45  
46  
47  
48  
49  
50  
51  
52  
53  
54  
55  
56  
57  
58  
59  
60

## Footnotes

**Contributorship statement:** EU conceived and designed the study with input from KW and JD. EU and CW categorised the data. EU analysed and interpreted the data with support from KW. EU drafted the manuscript and all authors participated in the revision process and have approved this submission for publication. EU is guarantor, had full access to all of the data in the study, and can take responsibility for the integrity of the data and the accuracy of the data analysis.

**Funding:** No specific funding was obtained for this study. EU is a PhD student, and recipient of a UCL Impact studentship. None of the funders influenced the conduct of this research.

**Competing interests:** All authors have completed the ICMJE uniform disclosure form at [www.icmje.org/coi\\_disclosure.pdf](http://www.icmje.org/coi_disclosure.pdf). All authors declare no competing interests that may be relevant to the submitted work.

**Ethical approval:** The study is part of a research project that has received ethical approval from the UCL Research Ethics Committee.

**Data sharing statement:** No additional data available.

**Transparency declaration:** EU, as guarantor, affirms that this manuscript is an honest, accurate and transparent account of the study being reported; that no important aspects of the study have been omitted; and that any discrepancies from the study as planned have been explained.

**Copyright:** The corresponding author has the right to grant on behalf of all authors and does grant on behalf of all authors, a worldwide licence to the Publishers and its licensees in perpetuity, in all forms, formats and media (whether known now or created in the future), to i) publish, reproduce, distribute, display and store the Contribution, ii) translate the Contribution into other languages, create adaptations, reprints, include within collections and create summaries, extracts and/or, abstracts of the Contribution, iii) create any other derivative work(s) based on the Contribution, iv) to exploit all subsidiary rights in the Contribution, v) the inclusion of electronic links from the Contribution to third party material where-ever it may be located; and, iv) licence any third party to do any or all of the above.

**Table 1:** Distribution of variables by sex of doctors.

| Variable                                           | Male<br>N=196,814 | Female<br>N=132,728 | Total<br>N=329,542 |
|----------------------------------------------------|-------------------|---------------------|--------------------|
| <b>Sanction imposed on registration</b>            |                   |                     |                    |
| No                                                 | 194,633 (98.9%)   | 132,212 (99.6%)     | 326,845 (99.2%)    |
| Yes                                                | 2,181 (1.1%)      | 516 (0.4%)          | 2,697 (0.8%)       |
| <b>No. of years since received PMQ<sup>i</sup></b> |                   |                     |                    |
| 0-2 years                                          | 6,332 (3.2%)      | 8,830 (6.7%)        | 15,162 (4.6%)      |
| 3-10 years                                         | 28,548 (14.5%)    | 37,220 (28.0%)      | 65,768 (20.0%)     |
| 11-20 years                                        | 52,437 (26.6%)    | 40,023 (30.2%)      | 92,460 (28.1%)     |
| 21-30 years                                        | 39,146 (19.9%)    | 23,069 (17.4%)      | 62,215 (18.9%)     |
| 31-40 years                                        | 30,206 (15.4%)    | 12,136 (9.1%)       | 42,342 (12.9%)     |
| ≥41 years                                          | 40,145 (20.4%)    | 11,450 (8.6%)       | 51,595 (15.7%)     |
| <b>Region where received PMQ</b>                   |                   |                     |                    |
| UK                                                 | 108,323 (55.0%)   | 86,989 (65.5%)      | 195,312 (59.3%)    |
| EEA <sup>ii</sup>                                  | 25,333 (12.9%)    | 15,880 (12.0%)      | 41,213 (12.5%)     |
| International                                      | 63,158 (32.1%)    | 29,859 (22.5%)      | 93,017 (28.2%)     |
| <b>Specialty</b>                                   |                   |                     |                    |
| No Specialty                                       | 94,815 (48.2%)    | 73,309 (55.2%)      | 168,124 (51.0%)    |
| Anaesthetics                                       | 8,710 (4.4%)      | 3,797 (2.9%)        | 12,507 (3.8%)      |
| EM <sup>iii</sup>                                  | 754 (0.4%)        | 209 (0.2%)          | 963 (0.3%)         |
| GP <sup>iv</sup>                                   | 37,959 (19.3%)    | 32,264 (24.3%)      | 70,223 (21.3%)     |
| Medicine                                           | 15,076 (7.7%)     | 6,775 (5.1%)        | 21,851 (6.6%)      |
| O&G <sup>v</sup>                                   | 2,934 (1.5%)      | 1,966 (1.5%)        | 4,900 (1.5%)       |
| Ophthalmology                                      | 2,508 (1.3%)      | 1,078 (0.8%)        | 3,586 (1.1%)       |
| Paediatrics                                        | 3,906 (2.0%)      | 3,891 (2.9%)        | 7,797 (2.4%)       |
| Pathology                                          | 5,589 (2.8%)      | 2,965 (2.2%)        | 8,554 (2.6%)       |
| Psychiatry                                         | 5,494 (2.8%)      | 3,077 (2.3%)        | 8,571 (2.6%)       |
| Radiology                                          | 172 (0.1%)        | 41 (0.03%)          | 213 (0.1%)         |
| Surgery                                            | 16,452 (8.4%)     | 1,942 (1.5%)        | 18,394 (5.6%)      |
| Other                                              | 1,330 (0.7%)      | 867 (0.7%)          | 2,197 (0.7%)       |
| Dual Specialty                                     | 1,115 (0.6%)      | 547 (0.4%)          | 1,662 (0.5%)       |

<sup>i</sup>Primary Medical Qualification<sup>iv</sup>General Practice<sup>ii</sup>European Economic Area<sup>v</sup>Obstetrics & Gynaecology<sup>iii</sup>Emergency Medicine

**Table 2:** The distribution of sanctions for each variable and the association of individual factors with sanctions.

| Variable                                           | Total number of doctors | Sanctions (%) | p-value |
|----------------------------------------------------|-------------------------|---------------|---------|
| <b>Sex</b>                                         |                         |               | <0.001  |
| Male                                               | 196,814                 | 1.1%          |         |
| Female                                             | 132,728                 | 0.4%          |         |
| <b>No. of years since received PMQ<sup>i</sup></b> |                         |               | <0.001  |
| 0-2                                                | 15,162                  | 0.1%          |         |
| 3-10                                               | 65,768                  | 0.6%          |         |
| 11-20                                              | 92,460                  | 0.8%          |         |
| 21-30                                              | 62,215                  | 1.1%          |         |
| 31-40                                              | 42,342                  | 1.4%          |         |
| ≥41                                                | 51,595                  | 0.7%          |         |
| <b>Region where received PMQ</b>                   |                         |               | <0.001  |
| UK                                                 | 195,312                 | 0.6%          |         |
| EEA <sup>ii</sup>                                  | 41,213                  | 0.9%          |         |
| International                                      | 93,017                  | 1.2%          |         |
| <b>Specialty</b>                                   |                         |               | <0.001  |
| No Specialty                                       | 168,124                 | 0.7%          |         |
| Anaesthetics                                       | 12,507                  | 0.7%          |         |
| EM <sup>iii</sup>                                  | 963                     | 0.7%          |         |
| GP <sup>iv</sup>                                   | 70,223                  | 1.2%          |         |
| Medicine                                           | 21,851                  | 0.5%          |         |
| O&G <sup>v</sup>                                   | 4,900                   | 1.2%          |         |
| Ophthalmology                                      | 3,586                   | 0.5%          |         |
| Paediatrics                                        | 7,797                   | 0.6%          |         |
| Pathology                                          | 8,554                   | 0.6%          |         |
| Psychiatry                                         | 8,571                   | 0.8%          |         |
| Radiology                                          | 213                     | 0.5%          |         |
| Surgery                                            | 18,394                  | 0.9%          |         |
| Other                                              | 2,197                   | 0.3%          |         |
| Dual Specialty                                     | 1,662                   | 1.4%          |         |

<sup>i</sup>Primary Medical Qualification

<sup>iv</sup>General Practice

<sup>ii</sup>European Economic Area

<sup>v</sup>Obstetrics & Gynaecology

<sup>iii</sup>Emergency Medicine



**Table 3:** The adjusted odds ratio for having sanctions against registration for each variable compared to its baseline having adjusted for all other variables.

| Variable                               | Adjusted OR <sup>i</sup> | 95% CI <sup>ii</sup> | p-value |
|----------------------------------------|--------------------------|----------------------|---------|
| <b>Sex of a doctor</b>                 |                          |                      | <0.0001 |
| Male                                   | 1                        |                      |         |
| Female                                 | 0.37                     | 0.33-0.41            |         |
| <b>No. of years since received PMQ</b> |                          |                      | <0.0001 |
| 0-2                                    | 1                        |                      |         |
| 3-10                                   | 3.42                     | 2.20-5.32            |         |
| 11-20                                  | 3.85                     | 2.48-5.98            |         |
| 21-30                                  | 5.66                     | 3.63-8.81            |         |
| 31-40                                  | 6.44                     | 4.13-10.05           |         |
| ≥41                                    | 3.12                     | 1.20-4.87            |         |
| <b>Region where received PMQ</b>       |                          |                      | <0.0001 |
| UK                                     | 1                        |                      |         |
| EEA                                    | 1.33                     | 1.17-1.50            |         |
| International                          | 1.65                     | 1.51-1.80            |         |
| <b>Specialty</b>                       |                          |                      | <0.0001 |
| No Specialty                           | 1                        |                      |         |
| Anaesthetics                           | 0.65                     | 0.52-0.82            |         |
| EM                                     | 0.66                     | 0.31-1.39            |         |
| GP                                     | 1.43                     | 1.29-1.58            |         |
| Medicine                               | 0.49                     | 0.40-0.60            |         |
| O&G                                    | 1.22                     | 0.93-1.59            |         |
| Ophthalmology                          | 0.53                     | 0.33-0.83            |         |
| Paediatrics                            | 0.64                     | 0.47-0.88            |         |
| Pathology                              | 0.65                     | 0.50-0.86            |         |
| Psychiatry                             | 0.81                     | 0.63-1.04            |         |
| Radiology                              | 0.47                     | 0.07-3.38            |         |
| Surgery                                | 0.78                     | 0.66-0.93            |         |
| Other                                  | 0.36                     | 0.17-0.77            |         |
| Dual Specialty                         | 1.37                     | 0.90-2.09            |         |

<sup>i</sup> Odds Ratio

<sup>ii</sup> Confidence Interval

**Table 4:** Stratum-specific odds ratios for having sanctions imposed on registration if the doctor is female for each specialty divided into four categories.

| Variable                  | Stratum-Specific OR <sup>i</sup> | 95% CI <sup>ii</sup> | p-value |
|---------------------------|----------------------------------|----------------------|---------|
| <b>Specialty Category</b> |                                  |                      | <0.0001 |
| No Specialty              | 0.43                             | 0.38-0.49            |         |
| GP                        | 0.26                             | 0.22-0.31            |         |
| Hospital Specialty        | 0.44                             | 0.36-0.56            |         |
| Dual Specialty            | 0.09                             | 0.13-0.70            |         |

<sup>i</sup> Odds Ratio

<sup>ii</sup> Confidence Interval

**Table 5:** The unadjusted and adjusted odds ratio for having each type of sanction against registration for a female doctor when compared to a male doctor.

| Sanction-type | Model 1                    |                     | Model 2 <sup>†</sup>     |                     |
|---------------|----------------------------|---------------------|--------------------------|---------------------|
|               | Unadjusted-OR <sup>‡</sup> | 95%-CI <sup>§</sup> | Adjusted-OR <sup>‡</sup> | 95%-CI <sup>§</sup> |
| Warning       | 0.29                       | 0.24-0.35           | 0.30                     | 0.25-0.36           |
| Undertakings  | 0.64                       | 0.52-0.79           | 0.66                     | 0.53-0.81           |
| Conditions    | 0.48                       | 0.39-0.59           | 0.54                     | 0.44-0.67           |
| Suspended     | 0.28                       | 0.21-0.36           | 0.32                     | 0.25-0.42           |
| Erased        | 0.21                       | 0.17-0.27           | 0.26                     | 0.21-0.34           |

<sup>†</sup>Model adjusted for number of years since received PMQ, region where received PMQ and specialty

<sup>‡</sup>Odds Ratio

<sup>§</sup>Confidence Interval

**Table 6:** Stratum specific odds ratios for having a warning imposed on registration if the doctor is female for each specialty divided into two categories.

| Variable                          | Stratum-Specific OR <sup>†</sup> | 95% CI <sup>‡</sup> | p-value |
|-----------------------------------|----------------------------------|---------------------|---------|
| <b>Specialty-Category</b>         |                                  |                     | 0.0034  |
| No-Specialty                      | 0.90                             | 0.67-1.20           |         |
| On-Specialist and/or-GP Registers | 0.48                             | 0.35-0.65           |         |

<sup>†</sup>Odds Ratio

<sup>‡</sup>Confidence Interval

**Table 7:** Stratum specific odds ratios for being erased from the LRMP if the doctor is female for each region where received PMQ divided into two categories.

| Variable                                  | Stratum-Specific OR <sup>†</sup> | 95% CI <sup>‡</sup> | p-value |
|-------------------------------------------|----------------------------------|---------------------|---------|
| <b>Region where received PMQ-Category</b> |                                  |                     | 0.0304  |
| EEA and/or-International                  | 0.32                             | 0.24-0.44           |         |
| UK                                        | 0.18                             | 0.11-0.28           |         |

<sup>†</sup>Odds Ratio

<sup>‡</sup>Confidence Interval

## References

1. General Medical Council. *The state of medical education and practice in the UK*. London: GMC; 2012.
2. Dyer C. GMC and vulnerable doctors: too blunt an instrument? *BMJ* 2013; 347: f6230.
3. Elston MA. *Women and medicine: the future*. London: Royal College of Physicians; 2009.
4. Alam A, Klemensberg J, Griesman J & Bell CM. The characteristics of physicians disciplined by professional colleges in Canada. *Open Medicine* 2011; 5(4): e173-e174.
5. Cardarelli R & Licciardone, JC. Factors associated with high-severity disciplinary action by a state medical board: a Texas study of medical license revocation. *JAOA* 2006; 106(3): 153-156.
6. Clay SW & Conaster RR. Characteristics of physicians disciplined by the State Medical Board of Ohio. *JAOA* 2003; 103(2): 81-88.
7. Khaliq AA, Dimassi H, Huang CY, Narine L & Smego RA Jr. Disciplinary action against physicians: who is likely to get disciplined? *The American Journal of Medicine* 2005; 118(7): 773-777.
8. Kohatsu ND, Gould D, Ross LK & Fox PJ. Characteristics associated with physician discipline: a case-control study. *Archives of Internal Medicine* 2004; 164(6): 653-658.
9. Morrison J & Wickersham P. Physicians disciplined by a State Medical Board. *JAMA* 1998; 279: 1889-1893.
10. Elkin KJ, Spittal MJ, Elkin DJ & Studdert DM. Doctors disciplined for professional misconduct in Australia and New Zealand, 2000-2009. *MJA* 2011; 194: 452-456.
11. Wakeford R. Who gets struck off? *BMJ* 2011; 343: d7842.

12. General Medical Council. *A guide for doctors referred to the GMC*. [http://www.gmc-uk.org/concerns/doctors\\_under\\_investigation/a\\_guide\\_for\\_referred\\_doctors.asp](http://www.gmc-uk.org/concerns/doctors_under_investigation/a_guide_for_referred_doctors.asp) (accessed December 2013)
13. Humphrey C, Hickman S & Gulliford MC. Place of medical qualification and outcomes of UK General Medical Council "fitness to practise" process: cohort study. *BMJ* 2011; 342: d1817.
14. European Union. *Countries*. [http://europa.eu/about-eu/countries/index\\_en.htm](http://europa.eu/about-eu/countries/index_en.htm) (accessed May 2013).
15. Von Elm E, Altman DG, Egger M, Pocock SJ, Gøtzsche PC & Vandenbroucke JP. The Strengthening the Reporting of Observational Studies in Epidemiology (STROBE) Statement: Guidelines for Reporting Observational Studies. *PLoS Med* 2007; 4(10): e296.
16. General Medical Council. *The state of medical education and practice in the UK*. London: GMC; 2013.
17. General Medical Council. *Guidance on making decisions on voluntary erasure applications*. GMC; 2013.
18. Lambert TW, Goldacre MJ & Parkhouse J. Doctors who qualified in the UK between 1974 and 1993: age, gender, nationality, marital status and family formation. *Medical Education* 1998; 32(5): 533-537.
19. Lambert TW, Goldacre MJ, Edwards C & Parkhouse J. Career preferences of doctors who qualified in the United Kingdom in 1993 compared with those doctors qualifying in 1974, 1977, 1980, and 1983. *BMJ* 1996; 313(7048): 19-24.
20. Taragin TI, Wilczek AP, Karns ME, Trout, R & Carson JL. Physician demographics and the risk of medical malpractice. *The American Journal of Medicine* 1992; 93(5): 537-542.
21. Firth-Cozens, J. Doctors with difficulties: why so few women? *Postgraduate Medical Journal* 2008; 84(992): 318-320.
22. Roter D, Lipkin M & Korsgaard A. Sex differences in patients' and physicians' communication during primary care medical visits. *Medical Care* 1991; 29(11): 1083-1093.
23. Bloor K, Freemantle N & Maynard A. Gender and variation in activity rates of hospital consultants. *J R Soc Med* 2008; 101(1): 27-33.
24. Goldacre MJ, Lambert TW & Davidson JM. Loss of British-trained doctors from the medical workforce in Great Britain. *Med Educ* 2001; 35(4): 337-344.

STROBE Statement—Checklist of items that should be included in reports of *cross-sectional studies*

|                              | Item No | Recommendation                                                                                                                                                                                               |     |
|------------------------------|---------|--------------------------------------------------------------------------------------------------------------------------------------------------------------------------------------------------------------|-----|
| <b>Title and abstract</b>    | 1       | (a) Indicate the study's design with a commonly used term in the title or the abstract                                                                                                                       | Y   |
|                              |         | (b) Provide in the abstract an informative and balanced summary of what was done and what was found                                                                                                          | Y   |
| <b>Introduction</b>          |         |                                                                                                                                                                                                              |     |
| Background/rationale         | 2       | Explain the scientific background and rationale for the investigation being reported                                                                                                                         | Y   |
| Objectives                   | 3       | State specific objectives, including any prespecified hypotheses                                                                                                                                             | Y   |
| <b>Methods</b>               |         |                                                                                                                                                                                                              |     |
| Study design                 | 4       | Present key elements of study design early in the paper                                                                                                                                                      | Y   |
| Setting                      | 5       | Describe the setting, locations, and relevant dates, including periods of recruitment, exposure, follow-up, and data collection                                                                              | Y   |
| Participants                 | 6       | (a) Give the eligibility criteria, and the sources and methods of selection of participants                                                                                                                  | Y   |
| Variables                    | 7       | Clearly define all outcomes, exposures, predictors, potential confounders, and effect modifiers. Give diagnostic criteria, if applicable                                                                     | Y   |
| Data sources/<br>measurement | 8*      | For each variable of interest, give sources of data and details of methods of assessment (measurement). Describe comparability of assessment methods if there is more than one group                         | Y   |
| Bias                         | 9       | Describe any efforts to address potential sources of bias                                                                                                                                                    | N/A |
| Study size                   | 10      | Explain how the study size was arrived at                                                                                                                                                                    | N/A |
| Quantitative variables       | 11      | Explain how quantitative variables were handled in the analyses. If applicable, describe which groupings were chosen and why                                                                                 | Y   |
| Statistical methods          | 12      | (a) Describe all statistical methods, including those used to control for confounding                                                                                                                        | Y   |
|                              |         | (b) Describe any methods used to examine subgroups and interactions                                                                                                                                          | Y   |
|                              |         | (c) Explain how missing data were addressed                                                                                                                                                                  | N/A |
|                              |         | (d) If applicable, describe analytical methods taking account of sampling strategy                                                                                                                           | N/A |
|                              |         | (e) Describe any sensitivity analyses                                                                                                                                                                        | N/A |
| <b>Results</b>               |         |                                                                                                                                                                                                              |     |
| Participants                 | 13*     | (a) Report numbers of individuals at each stage of study—eg numbers potentially eligible, examined for eligibility, confirmed eligible, included in the study, completing follow-up, and analysed            | N/A |
|                              |         | (b) Give reasons for non-participation at each stage                                                                                                                                                         | N/A |
|                              |         | (c) Consider use of a flow diagram                                                                                                                                                                           | N/A |
| Descriptive data             | 14*     | (a) Give characteristics of study participants (eg demographic, clinical, social) and information on exposures and potential confounders                                                                     | Y   |
|                              |         | (b) Indicate number of participants with missing data for each variable of interest                                                                                                                          | N/A |
| Outcome data                 | 15*     | Report numbers of outcome events or summary measures                                                                                                                                                         | Y   |
| Main results                 | 16      | (a) Give unadjusted estimates and, if applicable, confounder-adjusted estimates and their precision (eg, 95% confidence interval). Make clear which confounders were adjusted for and why they were included | Y   |

|                          |    |                                                                                                                                                                            |     |
|--------------------------|----|----------------------------------------------------------------------------------------------------------------------------------------------------------------------------|-----|
|                          |    | (b) Report category boundaries when continuous variables were categorized                                                                                                  | Y   |
|                          |    | (c) If relevant, consider translating estimates of relative risk into absolute risk for a meaningful time period                                                           | N/A |
| Other analyses           | 17 | Report other analyses done—eg analyses of subgroups and interactions, and sensitivity analyses                                                                             | Y   |
| <b>Discussion</b>        |    |                                                                                                                                                                            |     |
| Key results              | 18 | Summarise key results with reference to study objectives                                                                                                                   | Y   |
| Limitations              | 19 | Discuss limitations of the study, taking into account sources of potential bias or imprecision. Discuss both direction and magnitude of any potential bias                 | Y   |
| Interpretation           | 20 | Give a cautious overall interpretation of results considering objectives, limitations, multiplicity of analyses, results from similar studies, and other relevant evidence | Y   |
| Generalisability         | 21 | Discuss the generalisability (external validity) of the study results                                                                                                      | Y   |
| <b>Other information</b> |    |                                                                                                                                                                            |     |
| Funding                  | 22 | Give the source of funding and the role of the funders for the present study and, if applicable, for the original study on which the present article is based              | Y   |

\*Give information separately for exposed and unexposed groups.

**Note:** An Explanation and Elaboration article discusses each checklist item and gives methodological background and published examples of transparent reporting. The STROBE checklist is best used in conjunction with this article (freely available on the Web sites of PLoS Medicine at <http://www.plosmedicine.org/>, Annals of Internal Medicine at <http://www.annals.org/>, and Epidemiology at <http://www.epidem.com/>). Information on the STROBE Initiative is available at [www.strobe-statement.org](http://www.strobe-statement.org).

# BMJ Open

**Disciplined doctors: does the sex of a doctor matter?  
A cross-sectional study examining the association between  
a doctor's sex and receiving sanctions against their medical  
registration.**

|                                 |                                                                                                                                                                                                                                                              |
|---------------------------------|--------------------------------------------------------------------------------------------------------------------------------------------------------------------------------------------------------------------------------------------------------------|
| Journal:                        | <i>BMJ Open</i>                                                                                                                                                                                                                                              |
| Manuscript ID:                  | bmjopen-2014-005405.R2                                                                                                                                                                                                                                       |
| Article Type:                   | Research                                                                                                                                                                                                                                                     |
| Date Submitted by the Author:   | 16-Jul-2014                                                                                                                                                                                                                                                  |
| Complete List of Authors:       | Unwin, Emily; University College London, UCL Medical School<br>Woolf, Katherine; University College London, UCL Medical School<br>Wadlow, Clare; University College London, UCL Medical School<br>Dacre, Jane; University College London, UCL Medical School |
| <b>Primary Subject Heading</b>: | Medical education and training                                                                                                                                                                                                                               |
| Secondary Subject Heading:      | Health services research, Epidemiology                                                                                                                                                                                                                       |
| Keywords:                       | LAW (see Medical Law), MEDICAL EDUCATION & TRAINING,<br>EPIDEMIOLOGY, GMC, Gender                                                                                                                                                                            |
|                                 |                                                                                                                                                                                                                                                              |

SCHOLARONE™  
Manuscripts

## Title Page

### **Disciplined doctors: does the sex of a doctor matter? A cross-sectional study examining the association between a doctor's sex and receiving sanctions against their medical registration.**

Emily Unwin, Katherine Woolf, Clare Wadlow, Jane Dacre

#### **Corresponding author:**

Prof Jane Dacre, Director UCL Medical School  
UCL Medical School, 74 Huntley Street. London, WC1E 6AU. UK  
j.dacre@ucl.ac.uk  
Tel: 020 7679 0894  
Fax: 020 7679 0890

Dr Emily Unwin, PhD student  
UCL Medical School, Royal Free Hospital, London, NW3 2PF. UK

Dr Katherine Woolf, Lecturer  
UCL Medical School, Royal Free Hospital, London, NW3 2PF. UK

Dr Clare Wadlow, Clinical training fellow  
UCL Medical School, Royal Free Hospital, London, NW3 2PF. UK

#### **Key words:**

Law, Medical education & training, epidemiology, GMC, gender

#### **Word count:**

4767

## Abstract

**Objectives:** To examine the association between doctors' sex and receiving sanctions on their medical registration, whilst controlling for other potentially confounding variables.

**Design:** Cross-sectional study.

**Setting:** The General Medical Council's (GMC) List of Registered Medical Practitioners (LRMP) database of doctors practising in the United Kingdom (UK).

**Population:** All doctors on the GMC's LRMP on 29<sup>th</sup> May 2013. The database included all doctors who are or have been registered to practice medicine in the UK since October 2005. The exposure of interest was doctor's sex. Confounding variables included years since primary medical qualification, world region of primary medical qualification and specialty.

**Outcome measures:** Sanctions on a doctor's medical registration. Sanction types included warning, undertakings, conditions, suspension or erasure from the register. Binary logistic regression modelling, controlling for the confounders, described the association between doctor's sex and sanctions on a doctor's medical registration.

**Results:** Of the 329,542 doctors on the LRMP, 2,697 doctors (0.8%) had sanctions against their registration, 516 (19.1%) of whom were female. In the fully adjusted model, female doctors had nearly a third of the odds (OR 0.37, 95% CI: 0.33-0.41) of having sanctions compared to male doctors. There was evidence that the association varies with specialty, with female doctors who had specialised as General Practitioners (GPs) being the least likely to receive sanctions compared to their male colleagues (OR 0.26, 95% CI: 0.22-0.31).

**Conclusions:** Female doctors have reduced odds of receiving sanctions on their medical registration when compared to their male colleagues. This association remained after adjustment for the confounding factors. These results are representative of all doctors registered to practice in the UK. Further exploration of why doctors' sex may impact their professional performance is underway.



## Article summary

### Strengths and limitations of this study

- We used a large national database with no missing data, so the findings of the study apply to all doctors registered to practise in the UK.
- Receiving sanctions is a rare outcome and using a large dataset is crucial when examining rare outcomes.
- This is one of the first studies of this nature on UK data that adjusted for known confounders.
- The study was constrained by the variables collected and made available by the GMC. So we were unable to examine the effect of other potential confounding factors.
- The data available did not provide the reasons for why a sanction had been imposed, nor data on those granted voluntary erasure. A more detailed evaluation of the reasons for referral to the GMC may go towards explaining the sex difference observed.

## Introduction

The number of complaints about doctors' fitness to practise received by the UK medical regulatory body, the General Medical Council (GMC), has been increasing since 2007<sup>1</sup>. Following a triage and investigation process by the GMC the outcome of a case against a doctor can be closed, or can result in a sanction against the doctor's registration. The cost of this regulatory process, both in terms of financial cost of the actual complaints investigation procedure, but also in terms of the loss of the medical workforce during the process, can be significant. The level of stress that a doctor endures while undergoing a fitness to practise investigation was recently reported in the BMJ and highlights the impact the complaints investigation procedure can have on the mental well being of doctors<sup>2</sup>.

One of the most significant changes in the medical profession has been the increase in the number of women entering this previously male dominated profession. The number of female medical students has been increasing since the mid-1960s with female medical students outnumbering male medical students since the mid-1990s<sup>3</sup>. It is predicted that female doctors will outnumber their male colleagues by 2017<sup>3</sup>. This change in the demographic profile of UK doctors has brought with it a heightened interest in how the increase of female doctors may impact the profession.

Examining and understanding the predictors of doctors receiving sanctions may aid the medical profession in identifying doctors whose performance might raise future concerns, in order to support these doctors and help prevent GMC referral. Research from Canada, the United States of America and Australia and New Zealand has suggested that male and female doctors differ in terms of risk of disciplinary action, with male doctors being at increased risk<sup>4,5,6,7,8,9,10</sup>. However, the applicability of the findings from these studies to the UK may be limited due to differences in both the medical and legal systems in these countries. In 2011 Wakeford explored the situation in the UK<sup>11</sup>. He examined the factors associated with severest outcomes of the GMC disciplinary procedures, suspension or erasure from the medical register. In agreement with these worldwide studies, he demonstrated that female doctors were four times less likely to be disciplined when compared to male doctors. However, the interpretation of this finding is limited because the measure of effect for doctors' sex was not adjusted for potential confounders.

1  
2  
3 We aimed to examine the effect of doctors' sex on receiving sanctions against their  
4 medical registration, while adjusting for known confounding factors. This would allow  
5 for a meaningful comparison of male and female doctors and their experience of  
6 disciplinary action in the UK.  
7  
8  
9

## 10 **Methods**

### 11 **Study design, setting and source of data**

12 We conducted a cross-sectional study using UK-wide data. The data and permission  
13 to use the data for research purposes were obtained from the GMC. This study is  
14 part of a research project that has received ethical approval from the UCL Research  
15 Ethics Committee.  
16  
17  
18

19 Under the Medical Act 1983 the GMC is required to keep up-to-date registers of  
20 qualified doctors. The main register is the List of Registered Medical Practitioners  
21 (LRMP). The LRMP is a list of all doctors registered to practise medicine in the UK,  
22 and as such changes daily. It lists those doctors who are (or could) practise  
23 medicine, as well as those doctors who have been suspended or erased. The GMC  
24 provided us with a snapshot of doctors registered on the LRMP on the 29<sup>th</sup> May  
25 2013. The list included all doctors who have been registered with the GMC (and  
26 therefore eligible to actively practise medicine) at any point in the period 20<sup>th</sup> October  
27 2005<sup>a</sup> – 28<sup>th</sup> May 2013. The different categories of registration status included:  
28 provisionally or fully registered; suspended; not registered – administrative reason, or  
29 deceased, or having relinquished registration; and not registered – erased after  
30 Fitness to Practise panel hearing. The database provided details of doctor's sex; the  
31 year, country, and institutions of the doctor's primary medical qualification and the  
32 doctor's current registration status, including whether they currently had any  
33 sanctions on their medical registration (see below for details). It classified doctors as  
34 General Practitioners (GPs) (on the GP register) and as hospital specialists (on the  
35 Specialist register). To become registered on the GP or Specialist registers a doctor  
36 must be a fully qualified consultant or GP (i.e. the doctor has successfully completed  
37 their Specialty Training). Doctors who are neither on the GP or Specialist registers  
38 can be primarily divided into two groups; the first being doctors who are currently  
39 undertaking a Specialty Training programme with the aim of becoming a GP or a  
40 consultant in a specialty; and the second group being composed of doctors in non-  
41 training posts. Non-training posts are doctors who are not fully qualified consultants  
42 or GPs. Non-training posts are focused to meet the National Health Service (NHS)  
43  
44  
45  
46  
47  
48  
49  
50  
51  
52  
53  
54  
55  
56

57 <sup>a</sup> The 20<sup>th</sup> October 2005 was the date when the GMC first began to publish full details of a doctor's  
58 registration status on the LRMP online.  
59  
60

1  
2  
3 service requirements and the doctors who choose to undertake a non-training post  
4 do so for a variety of reasons including difficulty in obtaining a place in a Specialty  
5 Training program due to the high competition, or doctors who prefer the work-life  
6 balance the non-training post can provide<sup>12</sup>.  
7  
8  
9

### 10 **Population**

11 All doctors who were listed on the LRMP on the 29<sup>th</sup> May 2013 were included.  
12  
13

### 14 **Primary outcome and exposure**

15 The outcome of interest was sanctions on a doctor's medical registration on the 29<sup>th</sup>  
16 May 2013.  
17  
18

19 The types of sanctions included:  
20

- 21 • **Warning:** issued when a doctor's performance has not been in keeping with  
22 the principles set by the GMC for doctors, but a restriction on the doctor's  
23 registration is not necessary. Warnings remain on the LRMP for a five year  
24 period;  
25
- 26 • **Undertakings:** an agreement between the GMC and the doctor about the  
27 doctor's future practice. The doctor must adhere to these undertakings to  
28 maintain their registration;  
29
- 30 • **Conditions:** set out by the GMC and restrict a doctor's practice. The doctor  
31 must comply with these conditions to maintain their registration. Conditions  
32 can initially be imposed for a maximum of three years and then be renewed in  
33 periods of up to 36 months;  
34
- 35 • **Suspension or erasure:** the doctor's licence is withdrawn by the GMC and  
36 they are no longer able to practise. Suspension from the register can last up  
37 to 12 months, but may be indefinite in certain circumstances.  
38  
39  
40  
41  
42

43 A sanction can be imposed if a doctor's fitness to practise has been proved to be  
44 impaired. The impairment can result from misconduct; poor professional  
45 performance; physical or mental ill health; or a conviction or fitness to practise  
46 determination by another regulatory body either in the UK or overseas<sup>13</sup>. However it  
47 is recognised that the reason for impairment can cross more than one category (for  
48 example a doctor with a drug misuse problem could be classified as having mental ill  
49 health, yet the effects of the drug abuse could impact their professional  
50 performance). The duration of a sanction on a doctor's registration varies and it is  
51 possible for doctors to have more than one sanction against their registration and this  
52 typically represents the outcomes of different complaints (For further information on  
53  
54  
55  
56  
57  
58  
59  
60

1  
2  
3 sanctions visit <http://www.gmc-uk.org/concerns/index.asp>). It was not possible to  
4 establish the date a sanction was imposed or the reason for why a sanction had  
5 been imposed from the available data.  
6  
7

8  
9 The outcome of interest was collapsed into a binary variable: doctors with sanctions  
10 against their registration; and doctors with no sanctions against their registration.  
11

12  
13 The exposure of interest was doctor's sex, as declared by the doctor to the GMC.  
14  
15

### 16 17 **Selection of variables**

18 The variables included in the study were selected before any statistical analysis.  
19 Data was available on the year of primary medical qualification (PMQ), country of  
20 PMQ and primary specialty, if on the Specialist or General Practitioner (GP)  
21 Registers. These variables were selected as a priori confounders based on findings  
22 from earlier research<sup>7,8,11,14</sup>, which demonstrated that these factors may influence the  
23 risk of receiving sanctions.  
24  
25

26  
27 Once the variables had been selected, we performed a variable reduction process, to  
28 reduce the number categories into meaningful categories. Once again, this was  
29 performed before any statistical analysis. The variable 'year of PMQ' was converted  
30 into 'number of years since qualification' by subtracting the year of PMQ from 2013  
31<sup>b</sup>. We then collapsed the variable into six categories. The first category '0-2 years'  
32 represented Foundation Training, the second category '3-10 years' represented the  
33 bulk of time a doctor would likely spend in Specialty Training. The subsequent  
34 categories were divided into 10-year blocks. The variable 'country of PMQ' was  
35 collapsed into three categories; 'UK', 'EEA' (European Economic Area) and  
36 'International'. The list of countries included in the EEA category was obtained from  
37 the European Union website<sup>15</sup> and included all countries that were members before  
38 May 2013. The variable 'specialty' was divided into fourteen categories. Doctors  
39 who were not present on either the Specialist Register or the GP Register were  
40 categorised as having 'no specialty' and represented trainee and other non-specialist  
41 doctors. Doctors on both the Specialist Register and the GP Register were recorded  
42 as having 'dual specialty' and doctors only on the GP register were categorised as  
43 'GP'. For doctors only registered on the Specialist Register, their primary specialty  
44 was taken and recorded into one of eleven categories. To categorise those doctors  
45  
46  
47  
48  
49  
50  
51  
52  
53  
54

55  
56 <sup>b</sup> As mentioned above, a doctor could appear in the LRMP dataset if they had been removed from the  
57 medical register. The actual date of those doctors being removed could lie anytime between 20<sup>th</sup>  
58 October 2005 and 28<sup>th</sup> May 2013. However, as no actual removal dates were given for those doctors,  
59 we used 2013 for all doctors.  
60

1  
2  
3 on the Specialist Register two researchers (EU and CW) independently allocated  
4 each primary specialty to a specialty category. Kappa statistic demonstrated a good  
5 level of agreement ( $\kappa = 0.72$ ). Any disagreements about specialty category  
6 allocation were resolved through discussion.  
7  
8  
9

### 10 11 **Statistical methods**

12 We took a causal modelling analysis approach to analyse the data. We firstly  
13 performed bivariate analyses to look for crude associations in the data, followed by  
14 Mantel-Haenszel analyses, before going on to complete multivariate analyses using  
15 binary logistic regression modelling. The initial logistic regression model included  
16 only the exposure (sex) and outcome (sanctions) variables to provide a crude  
17 measure of effect. The final logistic regression model was built to include all  
18 potential confounder variables, while checking for multicollinearity. The final logistic  
19 regression model enabled the calculation of an adjusted measure of effect. The final  
20 model was assessed for the presence of effect modifiers following the findings from  
21 the Mantel-Haenszel analyses.  
22  
23  
24  
25  
26  
27  
28

29 Statistical analyses were conducted using the software Stata 12/SE.  
30  
31

32 We used the STROBE Statement<sup>16</sup> to guide our study report.  
33  
34

### 35 **Results**

36 There were 329,542 doctors on the LRMP on the 29<sup>th</sup> May 2013, of whom 40.3%  
37 were female. Table 1 shows the distribution of variables by the sex of doctors. The  
38 median number of years since qualification was 19 years. The distribution of the  
39 number of years since a doctor had qualified was skewed to the right with the  
40 majority of the doctors qualifying 11-20 years ago (28.1%). The majority of the  
41 doctors had received their PMQ from a UK medical school (59.3%).  
42  
43  
44  
45

46 Approximately half of all the doctors were neither on the GP Register nor the  
47 Specialist Register (51.0%), of which the majority (58.0%) had received their PMQ  
48 greater than 10 years previously. It is interesting to note that half of the doctors  
49 registered to practise medicine in the UK in this period were not registered specialists  
50 (they were neither on the GP or Specialist registers) and the majority of these  
51 doctors had qualified greater than ten years ago, suggesting that these doctors are  
52 not trainee doctors, but doctors who have elected not to complete specialty training  
53 and are currently working in a non-training post. Of those doctors who had  
54  
55  
56  
57  
58  
59  
60

1  
2  
3 specialised, General Practice was the most popular specialty (21.3%), followed by  
4 Medicine (6.6%). 0.5% of the doctors were on both the Specialist and GP Registers.  
5  
6

7  
8 2697 (0.8%) doctors had sanctions against their registration on the 29<sup>th</sup> May 2013.  
9 There was a higher proportion of male doctors who had sanctions against their  
10 registration when compared to female doctors (1.1% of all male doctors compared  
11 with 0.4% of all female doctors,  $\chi^2=505.4$ ,  $P<0.001$ ). There was strong evidence for  
12 an association between receiving sanctions and the number of years since received  
13 PMQ, with doctors who qualified 31-40 years ago having the highest proportion of  
14 sanctions; world region of PMQ, with doctors who qualified outside the EEA with the  
15 highest proportion of doctors with sanctions; and specialty, with doctors on both the  
16 Specialist and GP Registers having the highest proportion of doctors with sanctions.  
17 These results are presented in Table 2.  
18  
19  
20  
21  
22  
23

24 Using bivariate analyses we compared female doctors to male doctors. There was a  
25 strong trend between sex of a doctor and the number of years since the doctor  
26 received their PMQ, with female doctors being more likely to have recently qualified  
27 and the proportion of female doctors reducing as the number of years since PMQ  
28 increased. We also found that female doctors were more likely to have qualified in  
29 the UK (65.5% of all female doctors compared to 55.0% of all male doctors) and  
30 male doctors were more likely to have qualified outside of the EEA (32.1% of all male  
31 doctors compared to 22.5% of all female doctors). Approximately equal proportions  
32 of male and female doctors qualified in the EEA (12.9% and 12.0% respectively).  
33 Both sexes were more likely to be not registered in a specialty (GP or hospital),  
34 though there was a slightly higher proportion of women when compared to men who  
35 were not on the Specialist or GP Registers. When examining those doctors who  
36 were registered in a specialty, a higher proportion of female doctors were on the GP  
37 Register compared to male doctors (24.3% of female doctors compared with 19.3%  
38 of male doctors) and a higher proportion of male doctors were registered with a  
39 hospital specialty (32.0% of male doctors compared with 20.1% of female doctors).  
40 In summary, number of years since received PMQ, world region where PMQ was  
41 received, and registered specialty were associated with both the outcome (sanctions)  
42 and the exposure (sex of a doctor) and as such we considered these variables as  
43 confounders.  
44  
45  
46  
47  
48  
49  
50  
51  
52  
53  
54  
55  
56  
57  
58  
59  
60

1  
2  
3 The unadjusted odds ratio for having sanctions against a doctor's registration  
4 comparing female doctors with male doctors was 0.35 (95% CI: 0.32-0.38),  
5 suggesting that being a female doctor is protective of receiving sanctions.  
6

7 Mantel-Haenszel analyses and tests of homogeneity were conducted to examine the  
8 change in the strength of the association between sanctions and sex while controlling  
9 for each of the confounders separately.  
10

11 There was strong evidence that the true odds ratios were different between the  
12 different specialty categories ( $P=0.0002$ ), therefore specialty was considered as an  
13 effect modifier when conducting multivariate analyses.  
14  
15

16  
17  
18 Table 3 represents the results from the binary logistic regression model built to adjust  
19 for all the variables. After taking into account the number of years since PMQ, world  
20 region where the doctor received their PMQ and specialty, female doctors had nearly  
21 a third of the odds of having sanctions on their registration compared to male doctors  
22 (OR 0.37, 95% CI: 0.33-0.41,  $P<0.0001$ ).  
23

24 All of the a priori confounders were felt to be confounders because the adjusted odds  
25 ratio changed when each variable was added to the model. We found no evidence  
26 of multicollinearity.  
27

28 The Mantel-Haenszel analyses suggested that specialty may be an effect modifier,  
29 we therefore performed a statistical test for effect modification by firstly collapsing the  
30 specialty variable into four groups to increase the power of the test. Table 4  
31 demonstrates that specialty was felt to be an important effect modifier with female  
32 doctors being less likely to receive sanctions when compared to male doctors, but  
33 the effect was greater for GPs than for those doctors with no specialty or practising a  
34 hospital specialty.  
35  
36  
37  
38  
39  
40  
41  
42

### 43 Discussion

44 In our large cross-sectional study we found strong evidence that being female was  
45 associated with a reduction in odds of receiving sanctions (OR 0.35, 95% CI: 0.32-  
46 0.38) in the unadjusted model. Controlling for years since PMQ, world region where  
47 received PMQ, and specialty did slightly increase this odds ratio (OR 0.37, 95% CI:  
48 0.33-0.41,  $P<0.0001$ ), but there remained strong evidence for the association  
49 between doctor's sex and receiving sanctions. There was evidence that the  
50 association varied with specialty, with female GPs being the least likely to have  
51 sanctions against their registration.  
52  
53  
54  
55  
56  
57  
58  
59  
60



1  
2  
3 To our knowledge this is the first study in the UK to examine the association between  
4 doctor's sex and receiving sanctions against medical registration, while adjusting for  
5 known confounders. We believe that these known confounders have only been  
6 adjusted for in one other study which was conducted in the USA<sup>8</sup>.  
7  
8  
9

### 10 **Strengths and weaknesses of this study**

11 One of the major strengths of this study is that we used a large national database.  
12 The advantage of using this dataset is two-fold; firstly, because a national database  
13 was used the findings of the study apply to all doctors registered to practise in the  
14 UK; secondly, receiving sanctions is a rare outcome and using a large dataset is  
15 crucial when examining rare outcomes.  
16  
17  
18

19 A further strength of this study is that it adjusted for known confounders, all these  
20 confounders have only been adjusted for in one previous study, which was  
21 conducted in California<sup>8</sup>. Previous research on UK data did not adjust the measure  
22 of effect of sex for potential confounders<sup>11</sup>.  
23  
24  
25

26 Finally, a further advantage was the completeness of the dataset. The data is  
27 collected by the GMC for inclusion on the LRMP, and not research purposes.  
28 Doctors are required to provide the data to the GMC to be registered and as such  
29 there is no missing data. However, the fact the data is not collected for research  
30 purposes is also a limitation of the study. The study was constrained by the  
31 information collected and made available by the GMC. As such, we were only able  
32 to explore the variables available. We were unable to examine the effect of other  
33 potential confounding factors or explore the reasons for why a sanction had been  
34 imposed, nor were we able to establish the date a sanction had been imposed.  
35  
36  
37  
38

39 It could be argued that the reason for referral to the GMC could be a source of  
40 residual confounding if systematic differences exist between the sexes. The GMC  
41 may take action against a doctor's registration for a number of reasons, which can be  
42 broadly divided into three major categories; misconduct; poor professional  
43 performance; or physical or mental ill health. The data available did not provide the  
44 reasons or the category for why a sanction had been imposed, but a more detailed  
45 evaluation of the reasons for referral to the GMC may go towards explaining the sex  
46 difference observed. In their research, Alam et al.<sup>4</sup> and Elkin et al.<sup>10</sup>, demonstrated  
47 not only that male doctors were more likely to be subject to disciplinary action, but  
48 that the main offense for which a doctor was being disciplined was sexual  
49 misconduct. It is possible that male doctors are more likely to commit an offense  
50 involving sexual misconduct than their female colleagues, which may go towards  
51 explaining the sex difference seen in these populations. However, other studies in  
52  
53  
54  
55  
56  
57  
58  
59  
60

1  
2  
3 this area did not find sexual misconduct to be the most common offense<sup>6,7,9</sup>. As  
4 such, exploring the offenses for which a doctor may receive disciplinary action in this  
5 population may go towards explaining the sex difference observed and may help the  
6 regulatory body and medical profession to introduce targeted interventions, such as  
7 education programmes, to reduce the number of offenses.  
8  
9

10 A further source of residual confounding could be the route of referral. Doctors  
11 practising in the UK can be referred to the GMC through five main routes; the public;  
12 employers; doctors; the GMC; and the police<sup>17</sup>. It would be interesting to examine  
13 whether the referral rate for each route demonstrates any sex differences, and if so,  
14 exploring the reasons for this difference.  
15  
16  
17

18 A further limitation is that a doctor can apply for voluntary erasure from the LRMP  
19 during an investigation process. Once again, this is a potential source of residual  
20 confounding and it is possible that the sex of doctors who are subject to a complaints  
21 investigation and apply for voluntary erasure differs to those doctors who complete  
22 the investigative process and receive a sanction (however, the GMC's decision to  
23 grant a request for voluntary erasure is based on the public interest and the doctor's  
24 health and likelihood to return to practise<sup>18</sup>). It is important to note that voluntary  
25 erasure is requested by doctors for multiple reasons other than being involved in an  
26 investigation process, including retiring permanently from practising medicine or  
27 leaving the UK to work permanently abroad. To explore whether voluntary erasure  
28 requests may explain the sex difference seen, the reason for why a voluntary erasure  
29 request was submitted would first have to be ascertained. This information was not  
30 available in the dataset used for this research, but could be requested and explored  
31 in future studies.  
32  
33  
34  
35  
36  
37  
38

39 It is also of interest to note that certain sanctions (erasure and some suspensions)  
40 are permanent, whereas other sanctions are time limited. As such, the permanent  
41 sanctions may be over represented because they will never be removed from a  
42 doctor's registration. If male doctors are more likely to receive these permanent  
43 sanctions, this could lead to male doctors being over represented when examining  
44 the association between sex and sanctions, and may go towards explaining the sex  
45 difference observed between doctors who had sanctions imposed against their  
46 registration.  
47  
48  
49  
50  
51

52 Finally, a further limitation of the study is that nearly half of the doctors in the  
53 population were not recorded on the GP or Specialist registers and were therefore  
54 classified as not having a specialty. Doctors who are not on the GP or Specialist  
55 registers typically fall into one of two categories; either a doctor who is on a Specialty  
56 Training programme with the aim of becoming a GP or a consultant in a specialty; or  
57  
58  
59  
60

1  
2  
3 doctors who have chosen to work in a non-training post. It was not possible from the  
4 information made available by the GMC to examine these two categories. It would  
5 be of interest to explore if the proportions of male and female doctors differ in these  
6 two categories and to examine whether the risk of disciplinary action differs for  
7 doctors who are in a Specialty Training post compared to doctors who are working in  
8 a non-training post. It would also be of interest if further information about the type of  
9 non-training post these doctors were working in and to examine the association with  
10 receiving sanctions.  
11  
12  
13  
14  
15

### 16 17 18 **Comparison with other studies**

19 Our main finding, that female doctors are less likely to be subject to disciplinary  
20 action when compared to their male colleagues, mirrors the results of several studies  
21 from across the world which have also examined the association between doctors'  
22 sex and disciplinary action<sup>4,6,7,8,9,10,11</sup>. However, the majority of these studies have  
23 been performed in the United States of America<sup>6,7,8,9</sup>, Canada<sup>4</sup>, Australia and New  
24 Zealand<sup>10</sup>, where the medical and legal systems differ to the UK and therefore we felt  
25 that their findings may not be applicable to the UK population of doctors. These  
26 studies' main objective was not necessarily to explore the association between  
27 doctors' sex and disciplinary action. Some of these studies were descriptive and  
28 those studies that did control for confounders did not, albeit for one study<sup>8</sup>, control for  
29 the same confounders we have selected. To our knowledge, one study has been  
30 performed in the UK using national data<sup>11</sup>, however when examining the association  
31 between doctors' sex and disciplinary action this study did not control for any  
32 potential confounders.  
33  
34  
35  
36  
37  
38  
39  
40

41 The findings of this study are in agreement with previous research that has shown  
42 that older doctors<sup>8</sup>, doctors who qualified outside of the country in which they are  
43 practising<sup>11,14</sup> and doctors of certain specialties<sup>7</sup> are more likely to be subjected to  
44 disciplinary action from a medical regulatory board. It has also been demonstrated in  
45 previous studies that female doctors are more likely to be have qualified more  
46 recently than male doctors<sup>3</sup>, are more likely to have qualified in the country in which  
47 they are practising<sup>19</sup> and choose different specialties to male doctors<sup>20</sup>.

48 This study showed that the reason that male doctors receive more sanctions is not  
49 because they qualified longer ago, nor because they are more likely to have qualified  
50 outside the UK, despite both of those factors being associated with increased  
51 likelihood of sanctions.  
52  
53  
54  
55  
56  
57  
58  
59  
60

### Unanswered questions and future research

This study has demonstrated that female doctors are less likely to receive sanctions against their medical registration compared to male doctors, however it is not clear why women are less likely to receive sanctions when compared to men. Exploring the possible reasons for this sex difference in professional performance is required, using a theoretical based approach. One theory suggested by some researchers is that male and female doctors differ in communication style and hence the interaction with patients and colleagues differed between the sexes, which could affect the risk of being subject to a complaint<sup>21,22</sup>. Future research could be performed to explore this further and examine whether communication styles differ between male and female doctors, and also whether the communication styles of doctors who receive sanctions differ from doctors who have never received sanctions.

We have also demonstrated that the effect of sex on likelihood to receive sanctions varied by specialty, with female GPs being the least likely to receive sanctions. It has been demonstrated by an observational study of primary care physicians in the USA that female primary care physicians spend more time with their patients when compared to their male colleagues and they engaged more in conversation, displaying more positive-talk, partnership-building, question-asking and information-giving<sup>23</sup>. These differences in communication style and time spent with patients may go towards explaining the larger sex discrepancy observed in GPs, however future research is required to explore these possible reasons further.

Our results show that doctors who had been qualified for longer were more likely to receive sanctions, it is therefore reasonable to hypothesise that the risk of receiving a sanction increases with exposure. Therefore doctors who have fewer patient encounters may be less likely to receive sanctions against their registration. Previous studies have demonstrated that female consultants have fewer patient episodes and are more likely to work part-time (and thus have fewer patient encounters) when compared to their male colleagues<sup>24,25</sup>, it is therefore reasonable to hypothesise that the sex difference observed in disciplinary action may be partly explained by the difference in work patterns between the sexes. This hypothesis merits being explored further by examining whether certain work patterns (i.e. part-time compared to full-time work) are more likely to be associated with receiving sanctions.

1  
2  
3 A further possible explanation for the sex difference observed is perhaps that male  
4 and female doctors are viewed and treated differently by the public, the profession  
5 and the regulatory body. It is possible that there is a higher threshold of tolerance for  
6 female doctors. The GMC are twice as likely to receive a complaint about a male  
7 doctor than a female doctor<sup>17</sup>. It is reasonable to assume that as a result male  
8 doctors are more likely to receive sanctions against their medical registration.  
9 Research examining the perception of male and female doctors would be warranted.  
10  
11

12  
13  
14  
15 It should also be noted that this study was observational in design and as such  
16 causality cannot be determined. It is possible that other factors, such as ethnicity,  
17 may be confounding the association between doctors' sex and disciplinary action.  
18 Research examining whether other potential confounders could explain the observed  
19 association is required  
20  
21  
22  
23

24 The points discussed above highlight that the real interest of this research is not  
25 about the outcome sanctions itself, but about trying to understand the differences  
26 between male and female doctors that lead to the observed sex difference in  
27 receiving sanctions. Investigations into why and how male and female medical  
28 practises differ will in turn lead to being able to propose interventions to reduce not  
29 only the number of doctors referred to the medical regulatory body, but also the  
30 difference between the sexes of doctors who are referred. Further exploration of why  
31 doctors' sex may impact their professional performance is needed to enable the  
32 profession to develop a better understanding of the factors associated with impaired  
33 fitness to practise and crucially, how to better support those doctors and ensure  
34 patient safety.  
35  
36  
37  
38  
39  
40  
41  
42  
43

#### 44 **Conclusion**

45 In this study we demonstrated that female doctors practising in the UK were less  
46 likely to receive sanctions on their medical registration when compared with their  
47 male colleagues. These findings remained after adjusting for known confounders.  
48 Reasons for why this sex difference exists needs to be examined.  
49  
50  
51  
52  
53  
54  
55  
56  
57  
58  
59  
60

## Footnotes

### Acknowledgements

We acknowledge Una Lane for facilitating access to the data and for answering our queries on the dataset. We acknowledge Andrew Ledgard for clarifying our queries on the dataset.

**Contributorship statement:** EU conceived and designed the study with input from KW and JD. EU and CW categorised the data. EU analysed and interpreted the data with support from KW. EU drafted the manuscript and all authors participated in the revision process and have approved this submission for publication. EU is guarantor, had full access to all of the data in the study, and can take responsibility for the integrity of the data and the accuracy of the data analysis.

**Funding:** No specific funding was obtained for this study. EU is a PhD student, and recipient of a UCL Impact studentship. None of the funders influenced the conduct of this research.

**Competing interests:** All authors have completed the ICMJE uniform disclosure form at [www.icmje.org/coi\\_disclosure.pdf](http://www.icmje.org/coi_disclosure.pdf). All authors declare no competing interests that may be relevant to the submitted work.

**Ethical approval:** The study is part of a research project that has received ethical approval from the UCL Research Ethics Committee.

**Data sharing statement:** No additional data available.

**Transparency declaration:** EU, as guarantor, affirms that this manuscript is an honest, accurate and transparent account of the study being reported; that no important aspects of the study have been omitted; and that any discrepancies from the study as planned have been explained.

**Copyright:** The corresponding author has the right to grant on behalf of all authors and does grant on behalf of all authors, a worldwide licence to the Publishers and its licensees in perpetuity, in all forms, formats and media (whether known now or created in the future), to i) publish, reproduce, distribute, display and store the

1  
2  
3 Contribution, ii) translate the Contribution into other languages, create adaptations,  
4 reprints, include within collections and create summaries, extracts and/or, abstracts  
5 of the Contribution, iii) create any other derivative work(s) based on the Contribution,  
6 iv) to exploit all subsidiary rights in the Contribution, v) the inclusion of electronic links  
7 from the Contribution to third party material where-ever it may be located; and, iv)  
8 licence any third party to do any or all of the above.  
9  
10  
11  
12  
13  
14  
15  
16  
17  
18  
19  
20  
21  
22  
23  
24  
25  
26  
27  
28  
29  
30  
31  
32  
33  
34  
35  
36  
37  
38  
39  
40  
41  
42  
43  
44  
45  
46  
47  
48  
49  
50  
51  
52  
53  
54  
55  
56  
57  
58  
59  
60

**Table 1:** Distribution of variables by sex of doctors.

| Variable                                           | Male<br>N=196,814 | Female<br>N=132,728 | Total<br>N=329,542 |
|----------------------------------------------------|-------------------|---------------------|--------------------|
| <b>Sanction imposed on registration</b>            |                   |                     |                    |
| No                                                 | 194,633 (98.9%)   | 132,212 (99.6%)     | 326,845 (99.2%)    |
| Yes                                                | 2,181 (1.1%)      | 516 (0.4%)          | 2,697 (0.8%)       |
| <b>No. of years since received PMQ<sup>i</sup></b> |                   |                     |                    |
| 0-2 years                                          | 6,332 (3.2%)      | 8,830 (6.7%)        | 15,162 (4.6%)      |
| 3-10 years                                         | 28,548 (14.5%)    | 37,220 (28.0%)      | 65,768 (20.0%)     |
| 11-20 years                                        | 52,437 (26.6%)    | 40,023 (30.2%)      | 92,460 (28.1%)     |
| 21-30 years                                        | 39,146 (19.9%)    | 23,069 (17.4%)      | 62,215 (18.9%)     |
| 31-40 years                                        | 30,206 (15.4%)    | 12,136 (9.1%)       | 42,342 (12.9%)     |
| ≥41 years                                          | 40,145 (20.4%)    | 11,450 (8.6%)       | 51,595 (15.7%)     |
| <b>Region where received PMQ</b>                   |                   |                     |                    |
| UK                                                 | 108,323 (55.0%)   | 86,989 (65.5%)      | 195,312 (59.3%)    |
| EEA <sup>ii</sup>                                  | 25,333 (12.9%)    | 15,880 (12.0%)      | 41,213 (12.5%)     |
| International                                      | 63,158 (32.1%)    | 29,859 (22.5%)      | 93,017 (28.2%)     |
| <b>Specialty</b>                                   |                   |                     |                    |
| No Specialty                                       | 94,815 (48.2%)    | 73,309 (55.2%)      | 168,124 (51.0%)    |
| Anaesthetics                                       | 8,710 (4.4%)      | 3,797 (2.9%)        | 12,507 (3.8%)      |
| EM <sup>iii</sup>                                  | 754 (0.4%)        | 209 (0.2%)          | 963 (0.3%)         |
| GP <sup>iv</sup>                                   | 37,959 (19.3%)    | 32,264 (24.3%)      | 70,223 (21.3%)     |
| Medicine                                           | 15,076 (7.7%)     | 6,775 (5.1%)        | 21,851 (6.6%)      |
| O&G <sup>v</sup>                                   | 2,934 (1.5%)      | 1,966 (1.5%)        | 4,900 (1.5%)       |
| Ophthalmology                                      | 2,508 (1.3%)      | 1,078 (0.8%)        | 3,586 (1.1%)       |
| Paediatrics                                        | 3,906 (2.0%)      | 3,891 (2.9%)        | 7,797 (2.4%)       |
| Pathology                                          | 5,589 (2.8%)      | 2,965 (2.2%)        | 8,554 (2.6%)       |
| Psychiatry                                         | 5,494 (2.8%)      | 3,077 (2.3%)        | 8,571 (2.6%)       |
| Radiology                                          | 172 (0.1%)        | 41 (0.03%)          | 213 (0.1%)         |
| Surgery                                            | 16,452 (8.4%)     | 1,942 (1.5%)        | 18,394 (5.6%)      |
| Other                                              | 1,330 (0.7%)      | 867 (0.7%)          | 2,197 (0.7%)       |
| Dual Specialty                                     | 1,115 (0.6%)      | 547 (0.4%)          | 1,662 (0.5%)       |

<sup>i</sup>Primary Medical Qualification<sup>ii</sup>European Economic Area<sup>iii</sup>Emergency Medicine<sup>iv</sup>General Practice<sup>v</sup>Obstetrics & Gynaecology



**Table 2:** The distribution of sanctions for each variable and the association of individual factors with sanctions.

| Variable                                           | Total number of doctors | Sanctions (%) | p-value |
|----------------------------------------------------|-------------------------|---------------|---------|
| <b>Sex</b>                                         |                         |               | <0.001  |
| Male                                               | 196,814                 | 1.1%          |         |
| Female                                             | 132,728                 | 0.4%          |         |
| <b>No. of years since received PMQ<sup>i</sup></b> |                         |               | <0.001  |
| 0-2                                                | 15,162                  | 0.1%          |         |
| 3-10                                               | 65,768                  | 0.6%          |         |
| 11-20                                              | 92,460                  | 0.8%          |         |
| 21-30                                              | 62,215                  | 1.1%          |         |
| 31-40                                              | 42,342                  | 1.4%          |         |
| ≥41                                                | 51,595                  | 0.7%          |         |
| <b>Region where received PMQ</b>                   |                         |               | <0.001  |
| UK                                                 | 195,312                 | 0.6%          |         |
| EEA <sup>ii</sup>                                  | 41,213                  | 0.9%          |         |
| International                                      | 93,017                  | 1.2%          |         |
| <b>Specialty</b>                                   |                         |               | <0.001  |
| No Specialty                                       | 168,124                 | 0.7%          |         |
| Anaesthetics                                       | 12,507                  | 0.7%          |         |
| EM <sup>iii</sup>                                  | 963                     | 0.7%          |         |
| GP <sup>iv</sup>                                   | 70,223                  | 1.2%          |         |
| Medicine                                           | 21,851                  | 0.5%          |         |
| O&G <sup>v</sup>                                   | 4,900                   | 1.2%          |         |
| Ophthalmology                                      | 3,586                   | 0.5%          |         |
| Paediatrics                                        | 7,797                   | 0.6%          |         |
| Pathology                                          | 8,554                   | 0.6%          |         |
| Psychiatry                                         | 8,571                   | 0.8%          |         |
| Radiology                                          | 213                     | 0.5%          |         |
| Surgery                                            | 18,394                  | 0.9%          |         |
| Other                                              | 2,197                   | 0.3%          |         |
| Dual Specialty                                     | 1,662                   | 1.4%          |         |

<sup>i</sup>Primary Medical Qualification<sup>ii</sup>European Economic Area<sup>iii</sup>Emergency Medicine<sup>iv</sup>General Practice<sup>v</sup>Obstetrics & Gynaecology

**Table 3:** The adjusted odds ratio for having sanctions against registration for each variable compared to its baseline having adjusted for all other variables.

| Variable                               | Adjusted OR <sup>i</sup> | 95% CI <sup>ii</sup> | p-value |
|----------------------------------------|--------------------------|----------------------|---------|
| <b>Sex of a doctor</b>                 |                          |                      |         |
|                                        |                          |                      | <0.0001 |
| Male                                   | 1                        |                      |         |
| Female                                 | 0.37                     | 0.33-0.41            |         |
| <b>No. of years since received PMQ</b> |                          |                      |         |
|                                        |                          |                      | <0.0001 |
| 0-2                                    | 1                        |                      |         |
| 3-10                                   | 3.42                     | 2.20-5.32            |         |
| 11-20                                  | 3.85                     | 2.48-5.98            |         |
| 21-30                                  | 5.66                     | 3.63-8.81            |         |
| 31-40                                  | 6.44                     | 4.13-10.05           |         |
| ≥41                                    | 3.12                     | 1.20-4.87            |         |
| <b>Region where received PMQ</b>       |                          |                      |         |
|                                        |                          |                      | <0.0001 |
| UK                                     | 1                        |                      |         |
| EEA                                    | 1.33                     | 1.17-1.50            |         |
| International                          | 1.65                     | 1.51-1.80            |         |
| <b>Specialty</b>                       |                          |                      |         |
|                                        |                          |                      | <0.0001 |
| No Specialty                           | 1                        |                      |         |
| Anaesthetics                           | 0.65                     | 0.52-0.82            |         |
| EM                                     | 0.66                     | 0.31-1.39            |         |
| GP                                     | 1.43                     | 1.29-1.58            |         |
| Medicine                               | 0.49                     | 0.40-0.60            |         |
| O&G                                    | 1.22                     | 0.93-1.59            |         |
| Ophthalmology                          | 0.53                     | 0.33-0.83            |         |
| Paediatrics                            | 0.64                     | 0.47-0.88            |         |
| Pathology                              | 0.65                     | 0.50-0.86            |         |
| Psychiatry                             | 0.81                     | 0.63-1.04            |         |
| Radiology                              | 0.47                     | 0.07-3.38            |         |
| Surgery                                | 0.78                     | 0.66-0.93            |         |
| Other                                  | 0.36                     | 0.17-0.77            |         |
| Dual Specialty                         | 1.37                     | 0.90-2.09            |         |

<sup>i</sup> Odds Ratio<sup>ii</sup> Confidence Interval**Table 4:** Stratum-specific odds ratios for having sanctions imposed on registration if the doctor is female for each specialty divided into four categories.

| Variable                  | Stratum-Specific OR <sup>i</sup> | 95% CI <sup>ii</sup> | p-value |
|---------------------------|----------------------------------|----------------------|---------|
| <b>Specialty Category</b> |                                  |                      |         |
|                           |                                  |                      | <0.0001 |
| No Specialty              | 0.43                             | 0.38-0.49            |         |
| GP                        | 0.26                             | 0.22-0.31            |         |
| Hospital Specialty        | 0.44                             | 0.36-0.56            |         |
| Dual Specialty            | 0.09                             | 0.13-0.70            |         |

<sup>i</sup> Odds Ratio<sup>ii</sup> Confidence Interval

## References

1. General Medical Council. *The state of medical education and practice in the UK*. London: GMC; 2012.
2. Dyer C. GMC and vulnerable doctors: too blunt an instrument? *BMJ* 2013; 347: f6230.
3. Elston MA. *Women and medicine: the future*. London: Royal College of Physicians; 2009.
4. Alam A, Klemensberg J, Griesman J et al. The characteristics of physicians disciplined by professional colleges in Canada. *Open Medicine* 2011; 5(4): e173-e174.
5. Cardarelli R & Licciardone, JC. Factors associated with high-severity disciplinary action by a state medical board: a Texas study of medical license revocation. *JAOA* 2006; 106(3): 153-156.
6. Clay SW & Conaster RR. Characteristics of physicians disciplined by the State Medical Board of Ohio. *JAOA* 2003; 103(2): 81-88.
7. Khaliq AA, Dimassi H, Huang CY et al. Disciplinary action against physicians: who is likely to get disciplined? *The American Journal of Medicine* 2005; 118(7): 773-777.
8. Kohatsu ND, Gould D, Ross LK et al. Characteristics associated with physician discipline: a case-control study. *Archives of Internal Medicine* 2004; 164(6): 653-658.
9. Morrison J & Wickersham P. Physicians disciplined by a State Medical Board. *JAMA* 1998; 279: 1889-1893.
10. Elkin KJ, Spittal MJ, Elkin DJ et al. Doctors disciplined for professional misconduct in Australia and New Zealand, 2000-2009. *MJA* 2011; 194: 452-456.
11. Wakeford R. Who gets struck off? *BMJ* 2011; 343: d7842.
12. National Health Service – Medical Careers. *Non-training posts*. [https://www.medicalcareers.nhs.uk/career\\_options/working\\_as\\_a\\_doctor/non-training\\_posts.aspx](https://www.medicalcareers.nhs.uk/career_options/working_as_a_doctor/non-training_posts.aspx) (accessed July 2014).
13. General Medical Council. *A guide for doctors referred to the GMC*. [http://www.gmc-uk.org/concerns/doctors\\_under\\_investigation/a\\_guide\\_for\\_referred\\_doctors.asp](http://www.gmc-uk.org/concerns/doctors_under_investigation/a_guide_for_referred_doctors.asp) (accessed December 2013).
14. Humphrey C, Hickman S & Gulliford MC. Place of medical qualification and outcomes of UK General Medical Council “fitness to practise” process: cohort study. *BMJ* 2011; 342: d1817.
15. European Union. *Countries*. [http://europa.eu/about-eu/countries/index\\_en.htm](http://europa.eu/about-eu/countries/index_en.htm) (accessed May 2013).
16. Von Elm E, Altman DG, Egger M, et al. The Strengthening the Reporting of Observational Studies in Epidemiology (STROBE) Statement: Guidelines for Reporting Observational Studies. *PLoS Med* 2007; 4(10): e296.
17. General Medical Council. *The state of medical education and practice in the UK*. London: GMC; 2013.
18. General Medical Council. *Guidance on making decisions on voluntary erasure applications*. GMC; 2013.
19. Lambert TW, Goldacre MJ & Parkhouse J. Doctors who qualified in the UK between 1974 and 1993: age, gender, nationality, marital status and family formation. *Medical Education* 1998; 32(5): 533-537.
20. Lambert TW, Goldacre MJ, Edwards C & Parkhouse J. Career preferences of doctors who qualified in the United Kingdom in 1993 compared with those doctors qualifying in 1974, 1977, 1980, and 1983. *BMJ* 1996; 313(7048): 19-24.
21. Taragin TI, Wilczek AP, Karns ME, et al. Physician demographics and the risk of medical malpractice. *The American Journal of Medicine* 1992; 93(5): 537-542.
22. Firth-Cozens, J. Doctors with difficulties: why so few women? *Postgraduate Medical Journal* 2008; 84(992): 318-320.
23. Roter D, Lipkin M & Korsgaard A. Sex differences in patients’ and physicians’ communication during primary care medical visits. *Medical Care* 1991; 29(11): 1083-1093.
24. Bloor K, Freemantle N & Maynard A. Gender and variation in activity rates of hospital consultants. *J R Soc Med* 2008; 101(1): 27-33.
25. Goldacre MJ, Lambert TW & Davidson JM. Loss of British-trained doctors from the medical workforce in Great Britain. *Med Educ* 2001; 35(4): 337-344.

## Title Page

**Disciplined doctors: does the sex of a doctor matter?  
A cross-sectional study examining the association between a doctor's  
sex and receiving sanctions against their medical registration.**

Emily Unwin, Katherine Woolf, Clare Wadlow, Jane Dacre

**Corresponding author:**

Prof Jane Dacre, Director UCL Medical School  
UCL Medical School, 74 Huntley Street. London, WC1E 6AU. UK  
j.dacre@ucl.ac.uk  
Tel: 020 7679 0894  
Fax: 020 7679 0890

Dr Emily Unwin, PhD student  
UCL Medical School, Royal Free Hospital, London, NW3 2PF. UK

Dr Katherine Woolf, Lecturer  
UCL Medical School, Royal Free Hospital, London, NW3 2PF. UK

Dr Clare Wadlow, Clinical training fellow  
UCL Medical School, Royal Free Hospital, London, NW3 2PF. UK

**Key words:**

Law, Medical education & training, epidemiology, GMC, gender

**Word count:**

4767

## Abstract

**Objectives:** To examine the association between doctors' sex and receiving sanctions on their medical registration, whilst controlling for other potentially confounding variables.

**Design:** Cross-sectional study.

**Setting:** The General Medical Council's (GMC) List of Registered Medical Practitioners (LRMP) database of doctors practising in the United Kingdom (UK).

**Population:** All doctors on the GMC's LRMP on 29<sup>th</sup> May 2013. The database included all doctors who are or have been registered to practice medicine in the UK since October 2005. The exposure of interest was doctor's sex. Confounding variables included years since primary medical qualification, world region of primary medical qualification and specialty.

**Outcome measures:** Sanctions on a doctor's medical registration. Sanction types included warning, undertakings, conditions, suspension or erasure from the register. Binary logistic regression modelling, controlling for the confounders, described the association between doctor's sex and sanctions on a doctor's medical registration.

**Results:** Of the 329,542 doctors on the LRMP, 2,697 doctors (0.8%) had sanctions against their registration, 516 (19.1%) of whom were female. In the fully adjusted model, female doctors had nearly a third of the odds (OR 0.37, 95% CI: 0.33-0.41) of having sanctions compared to male doctors. There was evidence that the association varies with specialty, with female doctors who had specialised as General Practitioners (GPs) being the least likely to receive sanctions compared to their male colleagues (OR 0.26, 95% CI: 0.22-0.31).

**Conclusions:** Female doctors have reduced odds of receiving sanctions on their medical registration when compared to their male colleagues. This association remained after adjustment for the confounding factors. These results are representative of all doctors registered to practice in the UK. Further exploration of why doctors' sex may impact their professional performance is underway.

## Article summary

### Strengths and limitations of this study

- We used a large national database with no missing data, so the findings of the study apply to all doctors registered to practise in the UK.
- Receiving sanctions is a rare outcome and using a large dataset is crucial when examining rare outcomes.
- This is one of the first studies of this nature on UK data that adjusted for known confounders.
- The study was constrained by the variables collected and made available by the GMC. So we were unable to examine the effect of other potential confounding factors.
- The data available did not provide the reasons for why a sanction had been imposed, nor data on those granted voluntary erasure. A more detailed evaluation of the reasons for referral to the GMC may go towards explaining the sex difference observed.

## Introduction

The number of complaints about doctors' fitness to practise received by the UK medical regulatory body, the General Medical Council (GMC), has been increasing since 2007<sup>1</sup>. Following a triage and investigation process by the GMC the outcome of a case against a doctor can be closed, or can result in a sanction against the doctor's registration. The cost of this regulatory process, both in terms of financial cost of the actual complaints investigation procedure, but also in terms of the loss of the medical workforce during the process, can be significant. The level of stress that a doctor endures while undergoing a fitness to practise investigation was recently reported in the BMJ and highlights the impact the complaints investigation procedure can have on the mental well being of doctors<sup>2</sup>.

One of the most significant changes in the medical profession has been the increase in the number of women entering this previously male dominated profession. The number of female medical students has been increasing since the mid-1960s with female medical students outnumbering male medical students since the mid-1990s<sup>3</sup>. It is predicted that female doctors will outnumber their male colleagues by 2017<sup>3</sup>. This change in the demographic profile of UK doctors has brought with it a heightened interest in how the increase of female doctors may impact the profession.

Examining and understanding the predictors of doctors receiving sanctions may aid the medical profession in identifying doctors whose performance might raise future concerns, in order to support these doctors and help prevent GMC referral. Research from Canada, the United States of America and Australia and New Zealand has suggested that male and female doctors differ in terms of risk of disciplinary action, with male doctors being at increased risk<sup>4,5,6,7,8,9,10</sup>. However, the applicability of the findings from these studies to the UK may be limited due to differences in both the medical and legal systems in these countries. In 2011 Wakeford explored the situation in the UK<sup>11</sup>. He examined the factors associated with severest outcomes of the GMC disciplinary procedures, suspension or erasure from the medical register. In agreement with these worldwide studies, he demonstrated that female doctors were four times less likely to be disciplined when compared to male doctors. However, the interpretation of this finding is limited because the measure of effect for doctors' sex was not adjusted for potential confounders.

1  
2  
3 We aimed to examine the effect of doctors' sex on receiving sanctions against their  
4 medical registration, while adjusting for known confounding factors. This would allow  
5 for a meaningful comparison of male and female doctors and their experience of  
6 disciplinary action in the UK.  
7  
8  
9

## 10 **Methods**

### 11 **Study design, setting and source of data**

12 We conducted a cross-sectional study using UK-wide data. The data and permission  
13 to use the data for research purposes were obtained from the GMC. This study is  
14 part of a research project that has received ethical approval from the UCL Research  
15 Ethics Committee.  
16  
17

18 Under the Medical Act 1983 the GMC is required to keep up-to-date registers of  
19 qualified doctors. The main register is the List of Registered Medical Practitioners  
20 (LRMP). The LRMP is a list of all doctors registered to practise medicine in the UK,  
21 and as such changes daily. It lists those doctors who are (or could) practise  
22 medicine, as well as those doctors who have been suspended or erased. The GMC  
23 provided us with a snapshot of doctors registered on the LRMP on the 29<sup>th</sup> May  
24 2013. The list included all doctors who have been registered with the GMC (and  
25 therefore eligible to actively practise medicine) at any point in the period 20<sup>th</sup> October  
26 2005<sup>a</sup> – 28<sup>th</sup> May 2013. The different categories of registration status included:  
27 provisionally or fully registered; suspended; not registered – administrative reason, or  
28 deceased, or having relinquished registration; and not registered – erased after  
29 Fitness to Practise panel hearing. The database provided details of doctor's sex; the  
30 year, country, and institutions of the doctor's primary medical qualification and the  
31 doctor's current registration status, including whether they currently had any  
32 sanctions on their medical registration (see below for details). It classified doctors as  
33 General Practitioners (GPs) (on the GP register) and as hospital specialists (on the  
34 Specialist register). To become registered on the GP or Specialist registers a doctor  
35 must be a fully qualified consultant or GP (i.e. the doctor has successfully completed  
36 their Specialty Training). Doctors who are neither on the GP or Specialist registers  
37 can be primarily divided into two groups; the first being doctors who are currently  
38 undertaking a Specialty Training programme with the aim of becoming a GP or a  
39 consultant in a specialty; and the second group being composed of doctors in non-  
40 training posts are doctors who have not undertaken or completed speciality training.  
41 Non-training posts are doctors who are not fully qualified consultants or GPs. Non-  
42  
43  
44  
45  
46  
47  
48  
49  
50  
51  
52  
53  
54  
55  
56

57 <sup>a</sup> The 20<sup>th</sup> October 2005 was the date when the GMC first began to publish full details of a doctor's  
58 registration status on the LRMP online.  
59  
60



training posts are focused to meet the National Health Service (NHS) service requirements and the doctors who choose to undertake a non-training post do so for a variety of reasons including difficulty in obtaining a place in a Specialty Training program due to the high competition, or doctors who prefer the work-life balance the non-training post can provide<sup>12</sup>.

### Population

All doctors who were listed on the LRMP on the 29<sup>th</sup> May 2013 were included.

### Primary outcome and exposure

The outcome of interest was sanctions on a doctor's medical registration on the 29<sup>th</sup> May 2013.

The types of sanctions included:

- **Warning:** issued when a doctor's performance has not been in keeping with the principles set by the GMC for doctors, but a restriction on the doctor's registration is not necessary. Warnings remain on the LRMP for a five year period;
- **Undertakings:** an agreement between the GMC and the doctor about the doctor's future practice. The doctor must adhere to these undertakings to maintain their registration;
- **Conditions:** set out by the GMC and restrict a doctor's practice. The doctor must comply with these conditions to maintain their registration. Conditions can initially be imposed for a maximum of three years and then be renewed in periods of up to 36 months;
- **Suspension or erasure:** the doctor's licence is withdrawn by the GMC and they are no longer able to practise. Suspension from the register can last up to 12 months, but may be indefinite in certain circumstances.

A sanction can be imposed if a doctor's fitness to practise has been proved to be impaired. The impairment can result from misconduct; poor professional performance; physical or mental ill health; or a conviction or fitness to practise determination by another regulatory body either in the UK or overseas<sup>13</sup>. However it is recognised that the reason for impairment can cross more than one category (for example a doctor with a drug misuse problem could be classified as having mental ill health, yet the effects of the drug abuse could impact their professional performance). The duration of a sanction on a doctor's registration varies and it is possible for doctors to have more than one sanction against their registration and this

1  
2  
3 typically represents the outcomes of different complaints.—(For further information on  
4 [sanctions visit http://www.gmc-uk.org/concerns/index.asp](http://www.gmc-uk.org/concerns/index.asp)). It was not possible to  
5  
6 establish the date a sanction was imposed or the reason for why a sanction had  
7  
8 been imposed from the available data.  
9

10  
11 The outcome of interest was collapsed into a binary variable: doctors with sanctions  
12 against their registration; and doctors with no sanctions against their registration.  
13

14  
15 The exposure of interest was doctor's sex, as declared by the doctor to the GMC.  
16

### 17 18 **Selection of variables**

19  
20 The variables included in the study were selected before any statistical analysis.  
21 Data was available on the year of primary medical qualification (PMQ), country of  
22 PMQ and primary specialty, if on the Specialist or General Practitioner (GP)  
23 Registers. These variables were selected as a priori confounders based on findings  
24 from earlier research<sup>7,8,11,14</sup>, which demonstrated that these factors may influence the  
25 risk of receiving sanctions.  
26  
27

28  
29 Once the variables had been selected, we performed a variable reduction process, to  
30 reduce the number categories into meaningful categories. Once again, this was  
31 performed before any statistical analysis. The variable 'year of PMQ' was converted  
32 into 'number of years since qualification' by subtracting the year of PMQ from 2013  
33  
34 <sup>b</sup>. We then collapsed the variable into six categories. The first category '0-2 years'  
35 represented Foundation Training, the second category '3-10 years' represented the  
36 bulk of time a doctor would likely spend in Specialty Training. The subsequent  
37 categories were divided into 10-year blocks. The variable 'country of PMQ' was  
38 collapsed into three categories; 'UK', 'EEA' (European Economic Area) and  
39 'International'. The list of countries included in the EEA category was obtained from  
40 the European Union website<sup>15</sup> and included all countries that were members before  
41 May 2013. The variable 'specialty' was divided into fourteen categories. Doctors  
42 who were not present on either the Specialist Register or the GP Register were  
43 categorised as having 'no specialty' and represented trainee and other non-specialist  
44 doctors. Doctors on both the Specialist Register and the GP Register were recorded  
45 as having 'dual specialty' and doctors only on the GP register were categorised as  
46 'GP'. For doctors only registered on the Specialist Register, their primary specialty  
47  
48  
49  
50  
51  
52  
53  
54

55  
56 <sup>b</sup> As mentioned above, a doctor could appear in the LRMP dataset if they had been removed from the  
57 medical register. The actual date of those doctors being removed could lie anytime between 20<sup>th</sup>  
58 October 2005 and 28<sup>th</sup> May 2013. However, as no actual removal dates were given for those doctors,  
59 we used 2013 for all doctors.  
60

1  
2  
3 was taken and recorded into one of eleven categories. To categorise those doctors  
4 on the Specialist Register two researchers (EU and CW) independently allocated  
5 each primary specialty to a specialty category. Kappa statistic demonstrated a good  
6 level of agreement ( $\kappa = 0.72$ ). Any disagreements about specialty category  
7 allocation were resolved through discussion.  
8  
9

### 10 11 12 **Statistical methods**

13 We took a causal modelling analysis approach to analyse the data. We firstly  
14 performed bivariate analyses to look for crude associations in the data, followed by  
15 Mantel-Haenszel analyses, before going on to complete multivariate analyses using  
16 binary logistic regression modelling. The initial logistic regression model included  
17 only the exposure (sex) and outcome (sanctions) variables to provide a crude  
18 measure of effect. The final logistic regression model was built to include all  
19 potential confounder variables, while checking for multicollinearity. The final logistic  
20 regression model enabled the calculation of an adjusted measure of effect. The final  
21 model was assessed for the presence of effect modifiers following the findings from  
22 the Mantel-Haenszel analyses.  
23  
24  
25  
26  
27  
28

29  
30 Statistical analyses were conducted using the software Stata 12/SE.  
31

32  
33 We used the STROBE Statement<sup>16</sup> to guide our study report.  
34  
35

### 36 37 **Results**

38 There were 329,542 doctors on the LRMP on the 29<sup>th</sup> May 2013, of whom 40.3%  
39 were female. Table 1 shows the distribution of variables by the sex of doctors. The  
40 median number of years since qualification was 19 years. The distribution of the  
41 number of years since a doctor had qualified was skewed to the right with the  
42 majority of the doctors qualifying 11-20 years ago (28.1%). The majority of the  
43 doctors had received their PMQ from a UK medical school (59.3%).  
44  
45

46  
47 Approximately half of all the doctors were neither on the GP Register nor the  
48 Specialist Register (51.0%), of which the majority (58.0%) had received their PMQ  
49 greater than 10 years previously. It is interesting to note that half of the doctors  
50 registered to practise medicine in the UK in this period were not registered specialists  
51 (they were neither on the GP or Specialist registers) and the majority of these  
52 doctors had qualified greater than ten years ago, suggesting that these doctors are  
53 not trainee doctors, but doctors who have elected not to complete specialty training  
54 and are currently working in a non-training post. Of those doctors who had  
55  
56  
57  
58  
59  
60

1  
2  
3 specialised, General Practice was the most popular specialty (21.3%), followed by  
4 Medicine (6.6%). 0.5% of the doctors were on both the Specialist and GP Registers.  
5  
6

7  
8 2697 (0.8%) doctors had sanctions against their registration on the 29<sup>th</sup> May 2013.  
9 There was a higher proportion of male doctors who had sanctions against their  
10 registration when compared to female doctors (1.1% of all male doctors compared  
11 with 0.4% of all female doctors,  $\chi^2=505.4$ ,  $P<0.001$ ). There was strong evidence for  
12 an association between receiving sanctions and the number of years since received  
13 PMQ, with doctors who qualified 31-40 years ago having the highest proportion of  
14 sanctions; world region of PMQ, with doctors who qualified outside the EEA with the  
15 highest proportion of doctors with sanctions; and specialty, with doctors on both the  
16 Specialist and GP Registers having the highest proportion of doctors with sanctions.  
17 These results are presented in Table 2.  
18  
19  
20  
21  
22  
23

24 Using bivariate analyses we compared female doctors to male doctors. There was a  
25 strong trend between sex of a doctor and the number of years since the doctor  
26 received their PMQ, with female doctors being more likely to have recently qualified  
27 and the proportion of female doctors reducing as the number of years since PMQ  
28 increased. We also found that female doctors were more likely to have qualified in  
29 the UK (65.5% of all female doctors compared to 55.0% of all male doctors) and  
30 male doctors were more likely to have qualified outside of the EEA (32.1% of all male  
31 doctors compared to 22.5% of all female doctors). Approximately equal proportions  
32 of male and female doctors qualified in the EEA (12.9% and 12.0% respectively).  
33 Both sexes were more likely to be not registered in a specialty (GP or hospital),  
34 though there was a slightly higher proportion of women when compared to men who  
35 were not on the Specialist or GP Registers. When examining those doctors who  
36 were registered in a specialty, a higher proportion of female doctors were on the GP  
37 Register compared to male doctors (24.3% of female doctors compared with 19.3%  
38 of male doctors) and a higher proportion of male doctors were registered with a  
39 hospital specialty (32.0% of male doctors compared with 20.1% of female doctors).  
40 In summary, number of years since received PMQ, world region where PMQ was  
41 received, and registered specialty were associated with both the outcome (sanctions)  
42 and the exposure (sex of a doctor) and as such we considered these variables as  
43 confounders.  
44  
45  
46  
47  
48  
49  
50  
51  
52  
53  
54  
55  
56  
57  
58  
59  
60

1  
2  
3 The unadjusted odds ratio for having sanctions against a doctor's registration  
4 comparing female doctors with male doctors was 0.35 (95% CI: 0.32-0.38),  
5 suggesting that being a female doctor is protective of receiving sanctions.  
6

7 Mantel-Haenszel analyses and tests of homogeneity were conducted to examine the  
8 change in the strength of the association between sanctions and sex while controlling  
9 for each of the confounders separately.  
10

11 There was strong evidence that the true odds ratios were different between the  
12 different specialty categories ( $P=0.0002$ ), therefore specialty was considered as an  
13 effect modifier when conducting multivariate analyses.  
14  
15

16  
17  
18 Table 3 represents the results from the binary logistic regression model built to adjust  
19 for all the variables. After taking into account the number of years since PMQ, world  
20 region where the doctor received their PMQ and specialty, female doctors had nearly  
21 a third of the odds of having sanctions on their registration compared to male doctors  
22 (OR 0.37, 95% CI: 0.33-0.41,  $P<0.0001$ ).  
23  
24

25 All of the a priori confounders were felt to be confounders because the adjusted odds  
26 ratio changed when each variable was added to the model. We found no evidence  
27 of multicollinearity.  
28

29 The Mantel-Haenszel analyses suggested that specialty may be an effect modifier,  
30 we therefore performed a statistical test for effect modification by firstly collapsing the  
31 specialty variable into four groups to increase the power of the test. Table 4  
32 demonstrates that specialty was felt to be an important effect modifier with female  
33 doctors being less likely to receive sanctions when compared to male doctors, but  
34 the effect was greater for GPs than for those doctors with no specialty or practising a  
35 hospital specialty.  
36  
37  
38  
39  
40  
41  
42

### 43 Discussion

44 In our large cross-sectional study we found strong evidence that being female was  
45 associated with a reduction in odds of receiving sanctions (OR 0.35, 95% CI: 0.32-  
46 0.38) in the unadjusted model. Controlling for years since PMQ, world region where  
47 received PMQ, and specialty did slightly increase this odds ratio (OR 0.37, 95% CI:  
48 0.33-0.41,  $P<0.0001$ ), but there remained strong evidence for the association  
49 between doctor's sex and receiving sanctions. There was evidence that the  
50 association varied with specialty, with female GPs being the least likely to have  
51 sanctions against their registration.  
52  
53  
54  
55  
56  
57  
58  
59  
60

1  
2  
3 To our knowledge this is the first study in the UK to examine the association between  
4 doctor's sex and receiving sanctions against medical registration, while adjusting for  
5 known confounders. We believe that these known confounders have only been  
6 adjusted for in one other study which was conducted in the USA<sup>8</sup>.  
7  
8  
9

### 10 **Strengths and weaknesses of this study**

11 One of the major strengths of this study is that we used a large national database.  
12 The advantage of using this dataset is two-fold; firstly, because a national database  
13 was used the findings of the study apply to all doctors registered to practise in the  
14 UK; secondly, receiving sanctions is a rare outcome and using a large dataset is  
15 crucial when examining rare outcomes.  
16  
17

18 A further strength of this study is that it adjusted for known confounders, all these  
19 confounders have only been adjusted for in one previous study, which was  
20 conducted in California<sup>8</sup>. Previous research on UK data did not adjust the measure  
21 of effect of sex for potential confounders<sup>11</sup>.  
22

23 Finally, a further advantage was the completeness of the dataset. The data is  
24 collected by the GMC for inclusion on the LRMP, and not research purposes.  
25 Doctors are required to provide the data to the GMC to be registered and as such  
26 there is no missing data. However, the fact the data is not collected for research  
27 purposes is also a limitation of the study. The study was constrained by the  
28 information variables collected and made available by the GMC. As such, we were  
29 only able to explore the variables available. Wand we were unable to examine the  
30 effect of other potential confounding factors or explore the reasons for why a  
31 sanction had been imposed, nor were we able to establish the date a sanction had  
32 been imposed.  
33  
34  
35  
36  
37  
38  
39  
40

41 It could be argued that the reason for referral to the GMC could be a source of  
42 residual confounding if systematic differences exist between the sexes. The GMC  
43 may take action against a doctor's registration for a number of reasons, which can be  
44 broadly divided into three major categories; misconduct; poor professional  
45 performance; or physical or mental ill health. The data available did not provide the  
46 reasons or the category for why a sanction had been imposed, but a more detailed  
47 evaluation of the reasons for referral to the GMC may go towards explaining the sex  
48 difference observed. In their research, Alam et al.<sup>4</sup> and Elkin et al.<sup>10</sup>, demonstrated  
49 not only that male doctors were more likely to be subject to disciplinary action, but  
50 that the main offense for which a doctor was being disciplined was sexual  
51 misconduct. It is possible that male doctors are more likely to commit an offense  
52 involving sexual misconduct than their female colleagues, which may go towards  
53  
54  
55  
56  
57  
58  
59  
60

1  
2  
3 explaining the sex difference seen in these populations. However, other studies in  
4 this area did not find sexual misconduct to be the most common offense<sup>6,7,9</sup>. As  
5 such, exploring the offenses for which a doctor may receive disciplinary action in this  
6 population may go towards explaining the sex difference observed and may help the  
7 regulatory body and medical profession to introduce targeted interventions, such as  
8 education programmes, to reduce the number of offenses.  
9

10  
11 A further source of residual confounding could be the route of referral. Doctors  
12 practising in the UK can be referred to the GMC through five main routes; the public;  
13 employers; doctors; the GMC; and the police<sup>17</sup>. It would be interesting to examine  
14 whether the referral rate for each route demonstrates any sex differences, and if so,  
15 exploring the reasons for this difference.  
16  
17

18  
19 A further limitation is that a doctor can apply for voluntary erasure from the LRMP  
20 during an investigation process. Once again, this is a potential source of residual  
21 confounding and it is possible that the sex of doctors who are subject to a complaints  
22 investigation and apply for voluntary erasure differs to those doctors who complete  
23 the investigative process and receive a sanction (however, the GMC's decision to  
24 grant a request for voluntary erasure is based on the public interest and the doctor's  
25 health and likelihood to return to practise<sup>18</sup>). It is important to note that voluntary  
26 erasure is requested by doctors for multiple reasons other than being involved in an  
27 investigation process, including retiring permanently from practising medicine or  
28 leaving the UK to work permanently abroad. To explore whether voluntary erasure  
29 requests may explain the sex difference seen, the reason for why a voluntary erasure  
30 request was submitted would first have to be ascertained. This information was not  
31 available in the dataset used for this research, but could be requested and explored  
32 in future studies.  
33  
34  
35  
36  
37  
38  
39  
40

41 It is also of interest to note that certain sanctions (erasure and some suspensions)  
42 are permanent, whereas other sanctions are time limited. As such, the permanent  
43 sanctions may be over represented because they will never be removed from a  
44 doctor's registration. If male doctors are more likely to receive these permanent  
45 sanctions, this could lead to male doctors being over represented when examining  
46 the association between sex and sanctions, and may go towards explaining the sex  
47 difference observed between doctors who had sanctions imposed against their  
48 registration.  
49  
50  
51  
52

53 Finally, a further limitation of the study is that nearly half of the doctors in the  
54 population were not recorded on the GP or Specialist registers and were therefore  
55 classified as not having a specialty. Doctors who are not on the GP or Specialist  
56 registers typically fall into one of two categories; either a doctor who is on a Specialty  
57  
58  
59  
60

Training programme with the aim of becoming a GP or a consultant in a specialty; or doctors who have chosen to work in a non-training post. It was not possible from the information made available by the GMC to examine these two categories. It would be of interest to explore if the proportions of male and female doctors differ in these two categories and to examine whether the risk of disciplinary action differs for doctors who are in a Specialty Training post compared to doctors who are working in a non-training post. It would also be of interest if further information about the type of non-training post these doctors were working in and to examine the association with receiving sanctions.

### **Comparison with other studies**

Our main finding, that female doctors are less likely to be subject to disciplinary action when compared to their male colleagues, mirrors the results of several studies from across the world which have also examined the association between doctors' sex and disciplinary action<sup>4,6,7,8,9,10,11</sup>. However, the majority of these studies have been performed in the United States of America<sup>6,7,8,9</sup>, Canada<sup>4</sup>, Australia and New Zealand<sup>10</sup>, where the medical and legal systems differ to the UK and therefore we felt that their findings may not be applicable to the UK population of doctors. These studies' main objective was not necessarily to explore the association between doctors' sex and disciplinary action. Some of these studies were descriptive and those studies that did control for confounders did not, albeit for one study<sup>8</sup>, control for the same confounders we have selected. To our knowledge, one study has been performed in the UK using national data<sup>11</sup>, however when examining the association between doctors' sex and disciplinary action this study did not control for any potential confounders.

The findings of this study are in agreement with previous research that has shown that older doctors<sup>8</sup>, doctors who qualified outside of the country in which they are practising<sup>11,14</sup> and doctors of certain specialties<sup>7</sup> are more likely to be subjected to disciplinary action from a medical regulatory board. It has also been demonstrated in previous studies that female doctors are more likely to be have qualified more recently than male doctors<sup>3</sup>, are more likely to have qualified in the country in which they are practising<sup>19</sup> and choose different specialties to male doctors<sup>20</sup>.

This study showed that the reason that male doctors receive more sanctions is not because they qualified longer ago, nor because they are more likely to have qualified outside the UK, despite both of those factors being associated with increased likelihood of sanctions.



### Unanswered questions and future research

This study has demonstrated that female doctors are less likely to receive sanctions against their medical registration compared to male doctors, however it is not clear why women are less likely to receive sanctions when compared to men. Exploring the possible reasons for this sex difference in professional performance is required, using a theoretical based approach. One theory suggested by some researchers is that male and female doctors differ in communication style and hence the interaction with patients and colleagues differed between the sexes, which could affect the risk of being subject to a complaint<sup>21,22</sup>. Future research could be performed to explore this further and examine whether communication styles differ between male and female doctors, and also whether the communication styles of doctors who receive sanctions differ from doctors who have never received sanctions.

We have also demonstrated that the effect of sex on likelihood to receive sanctions varied by specialty, with female GPs being the least likely to receive sanctions. It has been demonstrated by an observational study of primary care physicians in the USA that female primary care physicians spend more time with their patients when compared to their male colleagues and they engaged more in conversation, displaying more positive-talk, partnership-building, question-asking and information-giving<sup>23</sup>. These differences in communication style and time spent with patients may go towards explaining the larger sex discrepancy observed in GPs, however future research is required to explore these possible reasons further.

Our results show that doctors who had been qualified for longer were more likely to receive sanctions, it is therefore reasonable to hypothesise that the risk of receiving a sanction increases with exposure. Therefore doctors who ~~work part time or~~ have fewer patient encounters may be less likely to receive sanctions against their registration. Previous studies have demonstrated that female consultants have fewer patient episodes and are more likely to work part-time (and thus have fewer patient encounters) when compared to their male colleagues<sup>24,25</sup>, it is therefore reasonable to hypothesise that the sex difference observed in disciplinary action may be partly explained by the difference in work patterns between the sexes. This hypothesis merits being explored further by examining whether certain work patterns (i.e. part-time compared to full-time work) are more likely to be associated with receiving sanctions. ~~these doctors who receive sanctions are more likely to work full time and~~

~~have more patient encounters than those doctors who have never received sanctions.~~

A further possible explanation for the sex difference observed is perhaps that male and female doctors are viewed and treated differently by the public, the profession and the regulatory body. It is possible that there is a higher threshold of tolerance for female doctors. The GMC are twice as likely to receive a complaint about a male doctor than a female doctor<sup>17</sup>. It is reasonable to assume that as a result male doctors are more likely to receive sanctions against their medical registration. Research examining the perception of male and female doctors would be warranted.

It should also be noted that this study was observational in design and as such causality cannot be determined. It is possible that other factors, such as ethnicity, may be confounding the association between doctors' sex and disciplinary action. Research examining whether other potential confounders could explain the observed association is required

The points discussed above highlight that the real interest of this research is not about the outcome sanctions itself, but about trying to understand the differences between male and female doctors that lead to the observed sex difference in receiving sanctions. Investigations into why and how male and female medical practises differ will in turn lead to being able to propose interventions to reduce not only the number of doctors referred to the medical regulatory body, but also the difference between the sexes of doctors who are referred. Further exploration of why doctors' sex may impact their professional performance is needed to enable the profession to develop a better understanding of the factors associated with impaired fitness to practise and crucially, how to better support those doctors and ensure patient safety.

## Conclusion

In this study we demonstrated that female doctors practising in the UK were less likely to receive sanctions on their medical registration when compared with their male colleagues. These findings remained after adjusting for known confounders. Reasons for why this sex difference exists needs to be examined.

## Acknowledgements

1  
2  
3  
4  
5  
6  
7  
8  
9  
10  
11  
12  
13  
14  
15  
16  
17  
18  
19  
20  
21  
22  
23  
24  
25  
26  
27  
28  
29  
30  
31  
32  
33  
34  
35  
36  
37  
38  
39  
40  
41  
42  
43  
44  
45  
46  
47  
48  
49  
50  
51  
52  
53  
54  
55  
56  
57  
58  
59  
60

We acknowledge Una Lane for facilitating access to the data and for answering our queries on the dataset. We acknowledge Andrew Ledgard for clarifying our queries on the dataset.

For peer review only

## Footnotes

**Contributorship statement:** EU conceived and designed the study with input from KW and JD. EU and CW categorised the data. EU analysed and interpreted the data with support from KW. EU drafted the manuscript and all authors participated in the revision process and have approved this submission for publication. EU is guarantor, had full access to all of the data in the study, and can take responsibility for the integrity of the data and the accuracy of the data analysis.

**Funding:** No specific funding was obtained for this study. EU is a PhD student, and recipient of a UCL Impact studentship. None of the funders influenced the conduct of this research.

**Competing interests:** All authors have completed the ICMJE uniform disclosure form at [www.icmje.org/coi\\_disclosure.pdf](http://www.icmje.org/coi_disclosure.pdf). All authors declare no competing interests that may be relevant to the submitted work.

**Ethical approval:** The study is part of a research project that has received ethical approval from the UCL Research Ethics Committee.

**Data sharing statement:** No additional data available.

**Transparency declaration:** EU, as guarantor, affirms that this manuscript is an honest, accurate and transparent account of the study being reported; that no important aspects of the study have been omitted; and that any discrepancies from the study as planned have been explained.

**Copyright:** The corresponding author has the right to grant on behalf of all authors and does grant on behalf of all authors, a worldwide licence to the Publishers and its licensees in perpetuity, in all forms, formats and media (whether known now or created in the future), to i) publish, reproduce, distribute, display and store the Contribution, ii) translate the Contribution into other languages, create adaptations, reprints, include within collections and create summaries, extracts and/or, abstracts of the Contribution, iii) create any other derivative work(s) based on the Contribution, iv) to exploit all subsidiary rights in the Contribution, v) the inclusion of electronic links from the Contribution to third party material where-ever it may be located; and, iv) licence any third party to do any or all of the above.

**Table 1:** Distribution of variables by sex of doctors.

| Variable                                           | Male<br>N=196,814 | Female<br>N=132,728 | Total<br>N=329,542 |
|----------------------------------------------------|-------------------|---------------------|--------------------|
| <b>Sanction imposed on registration</b>            |                   |                     |                    |
| No                                                 | 194,633 (98.9%)   | 132,212 (99.6%)     | 326,845 (99.2%)    |
| Yes                                                | 2,181 (1.1%)      | 516 (0.4%)          | 2,697 (0.8%)       |
| <b>No. of years since received PMQ<sup>i</sup></b> |                   |                     |                    |
| 0-2 years                                          | 6,332 (3.2%)      | 8,830 (6.7%)        | 15,162 (4.6%)      |
| 3-10 years                                         | 28,548 (14.5%)    | 37,220 (28.0%)      | 65,768 (20.0%)     |
| 11-20 years                                        | 52,437 (26.6%)    | 40,023 (30.2%)      | 92,460 (28.1%)     |
| 21-30 years                                        | 39,146 (19.9%)    | 23,069 (17.4%)      | 62,215 (18.9%)     |
| 31-40 years                                        | 30,206 (15.4%)    | 12,136 (9.1%)       | 42,342 (12.9%)     |
| ≥41 years                                          | 40,145 (20.4%)    | 11,450 (8.6%)       | 51,595 (15.7%)     |
| <b>Region where received PMQ</b>                   |                   |                     |                    |
| UK                                                 | 108,323 (55.0%)   | 86,989 (65.5%)      | 195,312 (59.3%)    |
| EEA <sup>ii</sup>                                  | 25,333 (12.9%)    | 15,880 (12.0%)      | 41,213 (12.5%)     |
| International                                      | 63,158 (32.1%)    | 29,859 (22.5%)      | 93,017 (28.2%)     |
| <b>Specialty</b>                                   |                   |                     |                    |
| No Specialty                                       | 94,815 (48.2%)    | 73,309 (55.2%)      | 168,124 (51.0%)    |
| Anaesthetics                                       | 8,710 (4.4%)      | 3,797 (2.9%)        | 12,507 (3.8%)      |
| EM <sup>iii</sup>                                  | 754 (0.4%)        | 209 (0.2%)          | 963 (0.3%)         |
| GP <sup>iv</sup>                                   | 37,959 (19.3%)    | 32,264 (24.3%)      | 70,223 (21.3%)     |
| Medicine                                           | 15,076 (7.7%)     | 6,775 (5.1%)        | 21,851 (6.6%)      |
| O&G <sup>v</sup>                                   | 2,934 (1.5%)      | 1,966 (1.5%)        | 4,900 (1.5%)       |
| Ophthalmology                                      | 2,508 (1.3%)      | 1,078 (0.8%)        | 3,586 (1.1%)       |
| Paediatrics                                        | 3,906 (2.0%)      | 3,891 (2.9%)        | 7,797 (2.4%)       |
| Pathology                                          | 5,589 (2.8%)      | 2,965 (2.2%)        | 8,554 (2.6%)       |
| Psychiatry                                         | 5,494 (2.8%)      | 3,077 (2.3%)        | 8,571 (2.6%)       |
| Radiology                                          | 172 (0.1%)        | 41 (0.03%)          | 213 (0.1%)         |
| Surgery                                            | 16,452 (8.4%)     | 1,942 (1.5%)        | 18,394 (5.6%)      |
| Other                                              | 1,330 (0.7%)      | 867 (0.7%)          | 2,197 (0.7%)       |
| Dual Specialty                                     | 1,115 (0.6%)      | 547 (0.4%)          | 1,662 (0.5%)       |

<sup>i</sup>Primary Medical Qualification<sup>ii</sup>European Economic Area<sup>iii</sup>Emergency Medicine<sup>iv</sup>General Practice<sup>v</sup>Obstetrics & Gynaecology

**Table 2:** The distribution of sanctions for each variable and the association of individual factors with sanctions.

| Variable                                           | Total number of doctors | Sanctions (%) | p-value |
|----------------------------------------------------|-------------------------|---------------|---------|
| <b>Sex</b>                                         |                         |               | <0.001  |
| Male                                               | 196,814                 | 1.1%          |         |
| Female                                             | 132,728                 | 0.4%          |         |
| <b>No. of years since received PMQ<sup>i</sup></b> |                         |               | <0.001  |
| 0-2                                                | 15,162                  | 0.1%          |         |
| 3-10                                               | 65,768                  | 0.6%          |         |
| 11-20                                              | 92,460                  | 0.8%          |         |
| 21-30                                              | 62,215                  | 1.1%          |         |
| 31-40                                              | 42,342                  | 1.4%          |         |
| ≥41                                                | 51,595                  | 0.7%          |         |
| <b>Region where received PMQ</b>                   |                         |               | <0.001  |
| UK                                                 | 195,312                 | 0.6%          |         |
| EEA <sup>ii</sup>                                  | 41,213                  | 0.9%          |         |
| International                                      | 93,017                  | 1.2%          |         |
| <b>Specialty</b>                                   |                         |               | <0.001  |
| No Specialty                                       | 168,124                 | 0.7%          |         |
| Anaesthetics                                       | 12,507                  | 0.7%          |         |
| EM <sup>iii</sup>                                  | 963                     | 0.7%          |         |
| GP <sup>iv</sup>                                   | 70,223                  | 1.2%          |         |
| Medicine                                           | 21,851                  | 0.5%          |         |
| O&G <sup>v</sup>                                   | 4,900                   | 1.2%          |         |
| Ophthalmology                                      | 3,586                   | 0.5%          |         |
| Paediatrics                                        | 7,797                   | 0.6%          |         |
| Pathology                                          | 8,554                   | 0.6%          |         |
| Psychiatry                                         | 8,571                   | 0.8%          |         |
| Radiology                                          | 213                     | 0.5%          |         |
| Surgery                                            | 18,394                  | 0.9%          |         |
| Other                                              | 2,197                   | 0.3%          |         |
| Dual Specialty                                     | 1,662                   | 1.4%          |         |

<sup>i</sup>Primary Medical Qualification<sup>ii</sup>European Economic Area<sup>iii</sup>Emergency Medicine<sup>iv</sup>General Practice<sup>v</sup>Obstetrics & Gynaecology

**Table 3:** The adjusted odds ratio for having sanctions against registration for each variable compared to its baseline having adjusted for all other variables.

| Variable                               | Adjusted OR <sup>i</sup> | 95% CI <sup>ii</sup> | p-value |
|----------------------------------------|--------------------------|----------------------|---------|
| <b>Sex of a doctor</b>                 |                          |                      |         |
|                                        |                          |                      | <0.0001 |
| Male                                   | 1                        |                      |         |
| Female                                 | 0.37                     | 0.33-0.41            |         |
| <b>No. of years since received PMQ</b> |                          |                      |         |
|                                        |                          |                      | <0.0001 |
| 0-2                                    | 1                        |                      |         |
| 3-10                                   | 3.42                     | 2.20-5.32            |         |
| 11-20                                  | 3.85                     | 2.48-5.98            |         |
| 21-30                                  | 5.66                     | 3.63-8.81            |         |
| 31-40                                  | 6.44                     | 4.13-10.05           |         |
| ≥41                                    | 3.12                     | 1.20-4.87            |         |
| <b>Region where received PMQ</b>       |                          |                      |         |
|                                        |                          |                      | <0.0001 |
| UK                                     | 1                        |                      |         |
| EEA                                    | 1.33                     | 1.17-1.50            |         |
| International                          | 1.65                     | 1.51-1.80            |         |
| <b>Specialty</b>                       |                          |                      |         |
|                                        |                          |                      | <0.0001 |
| No Specialty                           | 1                        |                      |         |
| Anaesthetics                           | 0.65                     | 0.52-0.82            |         |
| EM                                     | 0.66                     | 0.31-1.39            |         |
| GP                                     | 1.43                     | 1.29-1.58            |         |
| Medicine                               | 0.49                     | 0.40-0.60            |         |
| O&G                                    | 1.22                     | 0.93-1.59            |         |
| Ophthalmology                          | 0.53                     | 0.33-0.83            |         |
| Paediatrics                            | 0.64                     | 0.47-0.88            |         |
| Pathology                              | 0.65                     | 0.50-0.86            |         |
| Psychiatry                             | 0.81                     | 0.63-1.04            |         |
| Radiology                              | 0.47                     | 0.07-3.38            |         |
| Surgery                                | 0.78                     | 0.66-0.93            |         |
| Other                                  | 0.36                     | 0.17-0.77            |         |
| Dual Specialty                         | 1.37                     | 0.90-2.09            |         |

<sup>i</sup> Odds Ratio

<sup>ii</sup> Confidence Interval

**Table 4:** Stratum-specific odds ratios for having sanctions imposed on registration if the doctor is female for each specialty divided into four categories.

| Variable                  | Stratum-Specific OR <sup>i</sup> | 95% CI <sup>ii</sup> | p-value |
|---------------------------|----------------------------------|----------------------|---------|
| <b>Specialty Category</b> |                                  |                      |         |
|                           |                                  |                      | <0.0001 |
| No Specialty              | 0.43                             | 0.38-0.49            |         |
| GP                        | 0.26                             | 0.22-0.31            |         |
| Hospital Specialty        | 0.44                             | 0.36-0.56            |         |
| Dual Specialty            | 0.09                             | 0.13-0.70            |         |

<sup>i</sup> Odds Ratio

<sup>ii</sup> Confidence Interval

## References

1. General Medical Council. *The state of medical education and practice in the UK*. London: GMC; 2012.
2. Dyer C. GMC and vulnerable doctors: too blunt an instrument? *BMJ* 2013; 347: f6230.
3. Elston MA. *Women and medicine: the future*. London: Royal College of Physicians; 2009.
4. Alam A, Klemensberg J, Griesman J & Bell CM. The characteristics of physicians disciplined by professional colleges in Canada. *Open Medicine* 2011; 5(4): e173-e174.
5. Cardarelli R & Licciardone, JC. Factors associated with high-severity disciplinary action by a state medical board: a Texas study of medical license revocation. *JAOA* 2006; 106(3): 153-156.
6. Clay SW & Conaster RR. Characteristics of physicians disciplined by the State Medical Board of Ohio. *JAOA* 2003; 103(2): 81-88.
7. Khaliq AA, Dimassi H, Huang CY, Narine L & Smego RAJr. Disciplinary action against physicians: who is likely to get disciplined? *The American Journal of Medicine* 2005; 118(7): 773-777.
8. Kohatsu ND, Gould D, Ross LK & Fox PJ. Characteristics associated with physician discipline: a case-control study. *Archives of Internal Medicine* 2004; 164(6): 653-658.
9. Morrison J & Wickersham P. Physicians disciplined by a State Medical Board. *JAMA* 1998; 279: 1889-1893.
10. Elkin KJ, Spittal MJ, Elkin DJ & Studdert DM. Doctors disciplined for professional misconduct in Australia and New Zealand, 2000-2009. *MJA* 2011; 194: 452-456.
11. Wakeford R. Who gets struck off? *BMJ* 2011; 343: d7842.
12. National Health Service – Medical Careers. *Non-training posts*. [https://www.medicalcareers.nhs.uk/career\\_options/working\\_as\\_a\\_doctor/non-training\\_posts.aspx](https://www.medicalcareers.nhs.uk/career_options/working_as_a_doctor/non-training_posts.aspx) (accessed July 2014).
13. General Medical Council. *A guide for doctors referred to the GMC*. [http://www.gmc-uk.org/concerns/doctors\\_under\\_investigation/a\\_guide\\_for\\_referred\\_doctors.asp](http://www.gmc-uk.org/concerns/doctors_under_investigation/a_guide_for_referred_doctors.asp) (accessed December 2013).
14. Humphrey C, Hickman S & Gulliford MC. Place of medical qualification and outcomes of UK General Medical Council “fitness to practise” process: cohort study. *BMJ* 2011; 342: d1817.
15. European Union. *Countries*. [http://europa.eu/about-eu/countries/index\\_en.htm](http://europa.eu/about-eu/countries/index_en.htm) (accessed May 2013).
16. Von Elm E, Altman DG, Egger M, Pocock SJ, Gøtzsche PC & Vandembroucke JP. The Strengthening the Reporting of Observational Studies in Epidemiology (STROBE) Statement: Guidelines for Reporting Observational Studies. *PLoS Med* 2007; 4(10): e296.
17. General Medical Council. *The state of medical education and practice in the UK*. London: GMC; 2013.
18. General Medical Council. *Guidance on making decisions on voluntary erasure applications*. GMC; 2013.
19. Lambert TW, Goldacre MJ & Parkhouse J. Doctors who qualified in the UK between 1974 and 1993: age, gender, nationality, marital status and family formation. *Medical Education* 1998; 32(5): 533-537.
20. Lambert TW, Goldacre MJ, Edwards C & Parkhouse J. Career preferences of doctors who qualified in the United Kingdom in 1993 compared with those doctors qualifying in 1974, 1977, 1980, and 1983. *BMJ* 1996; 313(7048): 19-24.
21. Taragin TI, Wilczek AP, Karns ME, Trout, R & Carson JL. Physician demographics and the risk of medical malpractice. *The American Journal of Medicine* 1992; 93(5): 537-542.
22. Firth-Cozens, J. Doctors with difficulties: why so few women? *Postgraduate Medical Journal* 2008; 84(992): 318-320.
23. Roter D, Lipkin M & Korsgaard A. Sex differences in patients’ and physicians’ communication during primary care medical visits. *Medical Care* 1991; 29(11): 1083-1093.
24. Bloor K, Freemantle N & Maynard A. Gender and variation in activity rates of hospital consultants. *J R Soc Med* 2008; 101(1): 27-33.



1  
2  
3  
4  
5  
6  
7  
8  
9  
10  
11  
12  
13  
14  
15  
16  
17  
18  
19  
20  
21  
22  
23  
24  
25  
26  
27  
28  
29  
30  
31  
32  
33  
34  
35  
36  
37  
38  
39  
40  
41  
42  
43  
44  
45  
46  
47  
48  
49  
50  
51  
52  
53  
54  
55  
56  
57  
58  
59  
60

25. Goldacre MJ, Lambert TW & Davidson JM. Loss of British-trained doctors from the medical workforce in Great Britain. *Med Educ* 2001; 35(4): 337-344.

For peer review only

STROBE Statement—Checklist of items that should be included in reports of *cross-sectional studies*

|                              | Item No | Recommendation                                                                                                                                                                                               |     |
|------------------------------|---------|--------------------------------------------------------------------------------------------------------------------------------------------------------------------------------------------------------------|-----|
| <b>Title and abstract</b>    | 1       | (a) Indicate the study's design with a commonly used term in the title or the abstract                                                                                                                       | Y   |
|                              |         | (b) Provide in the abstract an informative and balanced summary of what was done and what was found                                                                                                          | Y   |
| <b>Introduction</b>          |         |                                                                                                                                                                                                              |     |
| Background/rationale         | 2       | Explain the scientific background and rationale for the investigation being reported                                                                                                                         | Y   |
| Objectives                   | 3       | State specific objectives, including any prespecified hypotheses                                                                                                                                             | Y   |
| <b>Methods</b>               |         |                                                                                                                                                                                                              |     |
| Study design                 | 4       | Present key elements of study design early in the paper                                                                                                                                                      | Y   |
| Setting                      | 5       | Describe the setting, locations, and relevant dates, including periods of recruitment, exposure, follow-up, and data collection                                                                              | Y   |
| Participants                 | 6       | (a) Give the eligibility criteria, and the sources and methods of selection of participants                                                                                                                  | Y   |
| Variables                    | 7       | Clearly define all outcomes, exposures, predictors, potential confounders, and effect modifiers. Give diagnostic criteria, if applicable                                                                     | Y   |
| Data sources/<br>measurement | 8*      | For each variable of interest, give sources of data and details of methods of assessment (measurement). Describe comparability of assessment methods if there is more than one group                         | Y   |
| Bias                         | 9       | Describe any efforts to address potential sources of bias                                                                                                                                                    | N/A |
| Study size                   | 10      | Explain how the study size was arrived at                                                                                                                                                                    | N/A |
| Quantitative variables       | 11      | Explain how quantitative variables were handled in the analyses. If applicable, describe which groupings were chosen and why                                                                                 | Y   |
| Statistical methods          | 12      | (a) Describe all statistical methods, including those used to control for confounding                                                                                                                        | Y   |
|                              |         | (b) Describe any methods used to examine subgroups and interactions                                                                                                                                          | Y   |
|                              |         | (c) Explain how missing data were addressed                                                                                                                                                                  | N/A |
|                              |         | (d) If applicable, describe analytical methods taking account of sampling strategy                                                                                                                           | N/A |
|                              |         | (e) Describe any sensitivity analyses                                                                                                                                                                        | N/A |
| <b>Results</b>               |         |                                                                                                                                                                                                              |     |
| Participants                 | 13*     | (a) Report numbers of individuals at each stage of study—eg numbers potentially eligible, examined for eligibility, confirmed eligible, included in the study, completing follow-up, and analysed            | N/A |
|                              |         | (b) Give reasons for non-participation at each stage                                                                                                                                                         | N/A |
|                              |         | (c) Consider use of a flow diagram                                                                                                                                                                           | N/A |
| Descriptive data             | 14*     | (a) Give characteristics of study participants (eg demographic, clinical, social) and information on exposures and potential confounders                                                                     | Y   |
|                              |         | (b) Indicate number of participants with missing data for each variable of interest                                                                                                                          | N/A |
| Outcome data                 | 15*     | Report numbers of outcome events or summary measures                                                                                                                                                         | Y   |
| Main results                 | 16      | (a) Give unadjusted estimates and, if applicable, confounder-adjusted estimates and their precision (eg, 95% confidence interval). Make clear which confounders were adjusted for and why they were included | Y   |

|                          |    |                                                                                                                                                                            |     |
|--------------------------|----|----------------------------------------------------------------------------------------------------------------------------------------------------------------------------|-----|
|                          |    | (b) Report category boundaries when continuous variables were categorized                                                                                                  | Y   |
|                          |    | (c) If relevant, consider translating estimates of relative risk into absolute risk for a meaningful time period                                                           | N/A |
| Other analyses           | 17 | Report other analyses done—eg analyses of subgroups and interactions, and sensitivity analyses                                                                             | Y   |
| <b>Discussion</b>        |    |                                                                                                                                                                            |     |
| Key results              | 18 | Summarise key results with reference to study objectives                                                                                                                   | Y   |
| Limitations              | 19 | Discuss limitations of the study, taking into account sources of potential bias or imprecision. Discuss both direction and magnitude of any potential bias                 | Y   |
| Interpretation           | 20 | Give a cautious overall interpretation of results considering objectives, limitations, multiplicity of analyses, results from similar studies, and other relevant evidence | Y   |
| Generalisability         | 21 | Discuss the generalisability (external validity) of the study results                                                                                                      | Y   |
| <b>Other information</b> |    |                                                                                                                                                                            |     |
| Funding                  | 22 | Give the source of funding and the role of the funders for the present study and, if applicable, for the original study on which the present article is based              | Y   |

\*Give information separately for exposed and unexposed groups.

**Note:** An Explanation and Elaboration article discusses each checklist item and gives methodological background and published examples of transparent reporting. The STROBE checklist is best used in conjunction with this article (freely available on the Web sites of PLoS Medicine at <http://www.plosmedicine.org/>, Annals of Internal Medicine at <http://www.annals.org/>, and Epidemiology at <http://www.epidem.com/>). Information on the STROBE Initiative is available at [www.strobe-statement.org](http://www.strobe-statement.org).
